1    **7 Tesla MRI of the *ex vivo* human brain at 100 micron resolution**

2

3    Brian L. Edlow<sup>1,2</sup>, Azma Mareyam<sup>2</sup>, Andreas Horn<sup>3</sup>, Jonathan R. Polimeni<sup>2</sup>, M. Dylan  
4    Tisdall<sup>4</sup>, Jean Augustinack<sup>2</sup>, Jason P. Stockmann<sup>2</sup>, Bram R. Diamond<sup>2</sup>, Allison  
5    Stevens<sup>2</sup>, Lee S. Tirrell<sup>2</sup>, Rebecca D. Folkerth<sup>5</sup>, Lawrence L. Wald<sup>2</sup>, Bruce Fischl<sup>2,\*</sup> &  
6    Andre van der Kouwe<sup>2,\*</sup>

7    \* co-senior authors

8

9    1. Center for Neurotechnology and Neurorecovery, Massachusetts General Hospital,  
10    Department of Neurology, Boston, MA 02114, USA

11    2. Athinoula A. Martinos Center for Biomedical Imaging, Massachusetts General  
12    Hospital, Department of Radiology, Charlestown, MA 02129, USA

13    3. Movement Disorders & Neuromodulation Section, Department for Neurology,  
14    Charité – University Medicine Berlin, Germany

15    4. Radiology, Perelman School of Medicine, University of Pennsylvania, Philadelphia,  
16    PA 19104, USA

17    5. City of New York Office of the Chief Medical Examiner, and New York University  
18    School of Medicine, New York, NY, USA

19

20    corresponding author: Brian Edlow (bedlow@mgh.harvard.edu)

21 **Abstract**

22 We present an ultra-high resolution MRI dataset of an *ex vivo* human brain  
23 specimen. The brain specimen was donated by a 58-year-old woman who  
24 had no history of neurological disease and died of non-neurological causes.  
25 After fixation in 10% formalin, the specimen was imaged on a 7 Tesla MRI  
26 scanner at 100  $\mu\text{m}$  isotropic resolution using a custom-built 31-channel  
27 receive array coil. Single-echo multi-flip Fast Low-Angle SHot (FLASH) data  
28 were acquired over 100 hours of scan time (25 hours per flip angle), allowing  
29 derivation of a T1 parameter map and synthesized FLASH volumes. This  
30 dataset provides an unprecedented view of the three-dimensional  
31 neuroanatomy of the human brain. To optimize the utility of this resource, we  
32 warped the dataset into standard stereotactic space. We now distribute the  
33 dataset in both native space and stereotactic space to the academic  
34 community via multiple platforms. We envision that this dataset will have a  
35 broad range of investigational, educational, and clinical applications that will  
36 advance understanding of human brain anatomy in health and disease.

37

|                                 |                                  |
|---------------------------------|----------------------------------|
| <b>Design Type(s)</b>           | Single measure design            |
| <b>Measurement Type(s)</b>      | Nuclear magnetic resonance assay |
| <b>Technology Type(s)</b>       | 7 Tesla MRI scanner              |
| <b>Factor Type(s)</b>           |                                  |
| <b>Sample Characteristic(s)</b> | Homo sapiens • brain             |

38

## 39 **Background & Summary**

40 Postmortem *ex vivo* MRI provides significant advantages over *in vivo* MRI for  
41 visualizing the microstructural neuroanatomy of the human brain. Whereas *in*  
42 *vivo* MRI acquisitions are constrained by time (i.e. ~hours) and affected by  
43 motion, *ex vivo* MRI can be performed without time constraints (i.e. ~days)  
44 and without cardiorespiratory or head motion. The resultant advantages for  
45 characterizing neuroanatomy at microscale are particularly important for  
46 identifying cortical layers and subcortical nuclei<sup>1-5</sup>, which are difficult to  
47 visualize even in the highest-resolution *in vivo* MRI datasets<sup>6,7</sup>. *Ex vivo* MRI  
48 also provides advantages over histological methods that are associated with  
49 distortion and tearing of human brain tissue during fixation, embedding, and  
50 slide-mounting.

51 As the field of *ex vivo* MRI has developed over the past two decades,  
52 several laboratories have focused on imaging blocks of tissue from human  
53 brain specimens using small-bore scanners<sup>2,8</sup> and specialized receive coils<sup>9-11</sup>.  
54 This approach allows for spatial resolutions of up to 35–75 microns for  
55 analyses of specific neuroanatomic regions<sup>9,11-13</sup>. However, ultra-high  
56 resolution imaging of whole human brain specimens at high magnetic field  
57 strengths has been far more challenging, due to the need for multi-channel  
58 receive coils and large-bore clinical scanners that can accommodate a whole-  
59 brain specimen. Whole-brain imaging is required to observe neuroanatomic  
60 relationships across distant brain regions, as well as to provide a complete  
61 view of human neuroanatomy in standard stereotactic space.

62 Here, we report the results of a multidisciplinary effort to image a whole  
63 human brain specimen *ex vivo* at an unprecedented spatial resolution of 100

64  $\mu\text{m}$  isotropic. Central to this effort was the construction of an integrated  
65 system consisting of a custom-built 31-channel receive array coil and volume  
66 transmit coil, which was designed to accommodate and tightly enclose an ex  
67 vivo human brain<sup>14</sup>. The scans were performed on a 7 Tesla whole-body  
68 human MRI scanner using four single-echo spoiled gradient-recalled echo  
69 (SPGR/GRE) or Fast Low-Angle SHot (FLASH) sequences. We used varying  
70 flip-angles (FA15°, FA20°, FA25°, FA30°) to generate multiple synthesized  
71 volumes, each of which provides a different tissue contrast. The scans,  
72 performed over ~100 hours (~25 hours per FA), generated an ~8 TB dataset  
73 (~2 TB per flip angle) that required custom-built computational tools for offline  
74 MRI reconstruction and creation of the synthesized volumes. Offline MRI  
75 reconstruction considerably reduces the data amount. We release the  
76 resulting FA25° acquisition, as well as the synthesized FLASH25 volume here,  
77 both in native space and coregistered to standard stereotactic space, for use  
78 by the academic community. We envision a broad range of investigational,  
79 educational, and clinical applications for this dataset that have the potential to  
80 advance understanding of human brain anatomy in health and disease.

81

## 82 **Methods**

### 83 **Specimen acquisition and processing**

84 A 58-year-old woman with a history of lymphoma and stem cell  
85 transplantation, but no history of neurological or psychiatric disease, died in a  
86 medical intensive care unit. She was initially admitted to the hospital for  
87 fevers, chills, and fatigue, and then was transferred to the intensive care unit  
88 for hypoxic respiratory failure requiring mechanical ventilation. Her hospital  
89 course was also notable for a deep venous thromboses and a pulmonary

90 embolism. The cause of her death on hospital day 15 was determined to be  
91 hypoxic respiratory failure due to viral pneumonia. At the time of her death,  
92 her surrogate decision-maker provided written informed consent for a clinical  
93 autopsy and for donation of her brain for research, as part of a protocol  
94 approved by our Institutional Review Board.

95 At autopsy, her fresh brain weighed 1,210 grams (normal range = 1,200  
96 to 1,500 grams). The brain was fixed in 10% formalin 14 hours after death.  
97 Gross examination revealed a normal brain (Fig. 1), without evidence of mass  
98 lesions or cerebrovascular disease. To ensure adequate fixation and prevent  
99 specimen flattening (which can prevent specimens from fitting into custom *ex*  
100 *vivo* MRI coils), we followed a series of standard specimen processing  
101 procedures, as previously described<sup>15</sup>.

102

### 103 **Specimen preparation for scanning**

104 After remaining in fixative for 35 months, the brain specimen was transferred  
105 to Fomblin Y LVAC 06/6 (perfluoropolyether, Solvay Specialty Polymers USA,  
106 LLC, West Deptford, NJ), which is invisible to MR and reduces magnetic  
107 susceptibility artifacts. The specimen, immersed in Fomblin, was then  
108 secured inside a custom-built, air-tight brain holder made of rugged  
109 urethane<sup>16</sup>. The brain holder contains degassing ports for removal of air  
110 bubbles, which further reduces magnetic susceptibility artifacts.

111

### 112 **Construction of a receive array coil and transmit volume coil for *ex vivo*** 113 **imaging of the whole human brain**

114 We built a receive coil apparatus consisting of a 31-channel surface coil loop  
115 array with two halves. The apparatus was fabricated using a 3D printer of

116 slightly larger dimensions than the brain holder, which slides inside the single-  
117 channel birdcage volume transmit coil (Fig. 2). The brain holder is an oblate  
118 spheroid (16 × 19 cm) that conforms to the shape of a whole brain (cerebral  
119 hemispheres + cerebellum + brainstem)<sup>16</sup> (Fig. 2d). It is made of two separate  
120 halves that can be sealed together with a silicone gasket after packing the  
121 brain inside. This holder must also withstand the degassing process when  
122 under vacuum pressure. Degassing is performed in three steps: 1) introducing  
123 vacuum suction into the container with the brain inside, which allows the  
124 bubbles to expand under decreased pressure and exit tissue cavities; 2)  
125 opening the valve to fill the holder with fomblin and then sealing off the fill  
126 valve; and 3) continuation of vacuum suction with low-amplitude vibration of  
127 the holder for 2-6 hours. The vibration facilitates the removal of bubbles from  
128 tissue cavities. All three steps are performed inside a fume hood.

129 The coil former (Fig. 2c) consists of two halves and encloses the brain  
130 holder. The receive array coil consists of 31 detectors (Fig. 2a), with 15  
131 elements on the top half (diameter = 5.5 cm) and 16 on the bottom half  
132 (diameter = 8.5 cm). Coil elements were constructed using 16 AWG wire  
133 loops<sup>17</sup>, each with four or five evenly spaced capacitors (Supplementary Fig.  
134 1). All elements were tuned to 297.2 MHz and matched to a loaded  
135 impedance of 75  $\Omega$  to minimize preamplifier noise. Preamplifier decoupling  
136 was achieved with a cable length of 6 cm. Preamplifiers were placed directly  
137 on the coil elements, yielding a substantial reduction in cable losses compared  
138 to a previous 30-channel *ex vivo* brain array<sup>18</sup>. The active detuning circuit was  
139 formed across the match capacitor using an inductor and PIN diode.

140 Tuning, matching, and decoupling of neighboring elements was  
141 optimized on the bench with a brain sample immersed in periodate-lysine-

142 paraformaldehyde (PLP) solution. Because coil loading varies with the fixative  
143 used, the coil must be tuned and matched on the bench using a brain sample  
144 with the correct fixative. (For example, testing can be performed with a brain  
145 sample immersed in PLP or formalin, but not the regular loading phantom  
146 comprised of water and salt). Loops tuned/matched on PLP showed  
147 unloaded-to-loaded quality factor ratio (Q-ratio) of  $Q_{UL}/Q_L = 210/20 = 10.5$ ,  
148 corresponding to an equivalent noise resistance of 11 ohms for the loaded coil  
149 ( $Q = \omega L/R$ ). By contrast, formalin is a less lossy fixative, giving a coil Q-ratio  
150 of  $Q_{UL}/Q_L = 210/60 = 3.5$ , corresponding to an equivalent noise resistance of 4  
151 ohms.

152 A shielded detunable volume coil (Fig. 2) was built for excitation, with  
153 the following parameters and features: band-pass birdcage, diameter 26.7 cm,  
154 and an extended length of 32 cm to accommodate brain samples of larger  
155 dimensions. For the detuning circuit we used diodes in every leg of the  
156 birdcage. These diodes are powered with the high-power chokes, which can  
157 withstand high voltage and short duration inversion pulses.

158 In summary, this coil system incorporates an improved mechanical  
159 design, preamps mounted at the coil detectors, and an extended transmit coil  
160 design capable of producing high-power pulses.

161

## 162 **7 Tesla MRI data acquisition**

163 The brain specimen was scanned on a whole-body human 7 Tesla (7T)  
164 Siemens Magnetom MRI scanner (Siemens Healthineers, Erlangen,  
165 Germany) with the custom-built coil described above. We utilized a GRE  
166 sequence<sup>19</sup> at 100  $\mu\text{m}$  isotropic spatial resolution with the following acquisition  
167 parameters: TR = 40 msec, TE = 14.2 msec, bandwidth = 90 Hz/px, FA = 15°,

168 20°, 25°, 30°. Total scan time for each FA was 25:01:52 [hh:mm:ss], and each  
169 FA acquisition generated 1.98 TB of raw k-space data. To improve the signal-  
170 to-noise ratio (SNR) and optimise T<sub>1</sub> modelling, we collected FLASH scans at  
171 four FAs: 15°, 20°, 25°, 30° (Fig. 3). Accounting for localizers, quality  
172 assurance (QA) scans, and adjustment scans, the total scan time was 100  
173 hours and 8 minutes, and we collected nearly 7.92 TB of raw k-space data.

174

### 175 **MRI data reconstruction**

176 The size of the k-space data exceeded the storage capacity of the RAID  
177 provided by the scanner image reconstruction computer. The image  
178 reconstruction also required more RAM than what was available. We  
179 therefore implemented software on the scanner to stream the data directly  
180 via TCP/IP to a server on an external computer added to the scanner network,  
181 which saved the data as they were received. Because of additional limitations  
182 related to the total size of the raw data for any single scan, as dictated by the  
183 imager RAID size, we also divided each acquisition into segments. The  
184 server on the external computer stored the data as they were acquired,  
185 creating date stamps for every k-space segment.

186 After the scan was completed, the streamed k-space data were  
187 transferred to a computational server where we ran custom software to stitch  
188 together the segments, reconstruct the images for each channel (via a 3D FFT  
189 on each volume per channel<sup>20</sup>), and combine the images derived from the 31  
190 channels via the root-sum-of-squares of the signal magnitudes at each voxel.  
191 These signal magnitudes were channel-wise decorrelated using a covariance  
192 matrix of the channels' thermal noise. The output from coil combination was  
193 the final acquired image (Data Citation 1; Videos 1, 2 and 3).



194

## 195 **MRI data processing**

196 The acquired data underwent a series of processing steps, culminating in the  
197 creation of a  $T_1$  parameter map and synthesized FLASH volumes (Fig. 3 and  
198 Fig. 4; Videos 4, 5, and 6; Data Citations 1 and 2). The volumes were  
199 estimated directly from the four FLASH acquisitions using the DESPOT1  
200 algorithm<sup>19,21</sup> with the program 'mri\_ms\_fitparms' distributed in FreeSurfer  
201 (<http://surfer.nmr.mgh.harvard.edu>) to quantify tissue properties independent  
202 of scanner and sequence types. This algorithm fits the tissue parameters (i.e.  
203  $T_1$ ) of the signal equation for the FLASH scan at each voxel using multiple  
204 input volumes. The volumes at the originally acquired TRs and flip angles  
205 were then regenerated from the parameter maps by evaluating the FLASH  
206 signal equation. In principle, a volume with any TR and flip angle combination  
207 could be synthesized. These synthesized volumes are created from all the  
208 acquired data, and therefore have better SNR than the individually acquired  
209 input volumes. We choose to release the 25 degree synthetic volume as it  
210 has maximal SNR and the best apparent contrast for cortical and subcortical  
211 structures<sup>9</sup>.

212 Of note, *ex vivo* MRI of the fixed human brain yields a different contrast  
213 than *in vivo* MRI, mainly from a shortened  $T_1$ , but also from a decrease in  $T_2^*$ ,  
214 both of which are related to formalin fixation<sup>22</sup>. The predominant source of  
215 signal contrast in *ex vivo* MRI is likely myelin<sup>23</sup> and/or iron<sup>24</sup>. Specifically,  
216 myelin appears to be a source of  $T_1$  contrast, while cortical iron appears to be  
217 a source of  $T_2^*$  contrast<sup>25</sup>.

218

## 219 **Coregistration of the dataset to standard stereotactic space**

220 The dataset was spatially normalized into the MNI ICBM 2009b NLIN ASYM  
221 template<sup>26</sup> (Supplementary Fig. 2a). This template constitutes the newest  
222 version of the “MNI space” and is considered a high-resolution version of MNI  
223 space because it is available at 0.5 mm isotropic resolution. To combine  
224 structural information present on T<sub>1</sub> and T<sub>2</sub> versions of the template, we  
225 created a joint template using PCA, as previously described<sup>27</sup>. The four  
226 synthesized FLASH volumes (FA15, FA20, FA25, and FA30) were  
227 downsampled to isotropic voxel-sizes of 0.5 mm for spatial normalization and  
228 initially registered into template space in a multispectral approach using  
229 Advanced Normalization Tools (ANTs; <http://stnava.github.io/ANTs/>; <sup>28</sup>). This  
230 multispectral approach simultaneously accounts for intensity data in all four  
231 volumes. The initial normalization was performed in four stages (rigid body,  
232 affine, whole brain SyN and subcortically focused SyN) as defined in the  
233 “effective: low variance + subcortical refine” preset implemented in Lead-DBS  
234 software ([www.lead-dbs.org](http://www.lead-dbs.org); <sup>29</sup>).

235 To refine the warp, we introduced fiducial regions of interest (ROI)  
236 iteratively using a tool developed for this task (available within Lead-DBS).  
237 Specifically, we manually drew line and point fiducial markers in both native  
238 and template spaces (Supplementary Fig. 2b). In addition, we manually  
239 segmented four structures in native space (subthalamic nucleus, internal and  
240 external pallidum and red nucleus). The three types of fiducials (line ROI,  
241 spherical ROI and manual segmentations of key structures) were then added  
242 as “spectra” in subsequent registration refinements (Supplementary Fig. 2c).  
243 Thus, the final registration consisted of a large number of pairings between  
244 native and template space (the first four being the actual anatomical volumes,  
245 the subsequent ones being manual segmentations and paired helper

246 fiducials). To achieve maximal registration precision, the warp was refined in  
247 over 30 iterations with extensive manual expert interaction, each refinement  
248 continuing directly from the last saved state. We used linear interpolation to  
249 create the normalized files in the data release (Data Citations 1 and 3).

250

### 251 **Code availability**

252 Neuroimaging data were processed using standard processing pipelines  
253 (<http://surfer.nmr.mgh.harvard.edu/>, <https://github.com/freesurfer/freesurfer>).  
254 All code used for registration of volumes into standard stereotactic space are  
255 available within the open-source Lead-DBS software  
256 (<https://github.com/leaddbs/leaddbs>). Because registration involved multiple  
257 manual user interface steps, no ready-made code is provided, but the process  
258 can be readily reproduced with the provided data and software.

259

### 260 **Data Records**

261 The native space FA25° acquisition and synthesized FLASH25 volume are  
262 available for download at <https://datadryad.org> (Data Citation 1). Additional  
263 synthesized volumes are available upon request to the corresponding author.  
264 Axial, coronal, and sagittal videos of the native space FA25° acquisition  
265 (Videos 1, 2, and 3) and synthesized FLASH25 volume (Videos 4, 5, and 6)  
266 are also available at the Dryad data repository (Data Citation 1). The  
267 synthesized FLASH25 volume is available for interactive, online viewing at  
268 <https://histopath.nmr.mgh.harvard.edu> (Data Citation 2). The normalized  
269 FLASH25 volume in standard stereotactic space is available at the Dryad data  
270 repository (Data Citation 1) and is hosted on [www.lead-dbs.org](http://www.lead-dbs.org) (preinstalled  
271 as part of the LEAD-DBS software package; Data Citation 3).

272

## 273 **Technical Validation**

### 274 **Coil signal-to-noise ratio (SNR) measurements**

275 The receive coil has a  $Q_{UL}/Q_L$  ratio that ranged from 6 in the top half elements  
276 to 8 in the bottom half elements due to larger coil diameter. The  $S_{12}$  coupling  
277 between neighbouring elements, measured with all other coils active detuned,  
278 ranged from  $-10.9$  to  $-24$  dB. All individual elements had  $S_{11} < -20$  dB and  
279 active detuning of  $> 30$  dB. We evaluated the performance of the transmit coil  
280 by examining the  $B_1^+$  profile<sup>14</sup>, which shows the efficiency throughout the  
281 entire spatial distribution of the brain specimen. The efficiency was greatest in  
282 the center of the specimen and fell off gradually towards the edges, as  
283 expected for a whole brain specimen at 7T.

284 We compared the SNR of the 31-channel *ex vivo* array to that of a  
285 standard 31-channel 7T head coil and a 64-channel 3T head coil. SNR maps  
286 were computed following the method of Kellman & McVeigh<sup>30</sup>. We calibrated  
287 the voltage required for  $180^\circ$  pulse using a  $B_1^+$  map (estimated with the AFI  
288 method)<sup>31</sup> with an ROI of 3-cm diameter at the center of the brain. We  
289 estimated array noise covariance from thermal noise data acquired without RF  
290 excitation. The SNR gain with the 31-channel *ex vivo* array was 1.6-fold  
291 versus the 31-channel 7T standard coil and 3.3-fold versus the 64-channel 3T  
292 head array (Fig. 5). The noise coupling between channels was 11% for the  
293 31-channel *ex vivo* array, a 2-fold improvement relative to our previous  
294 array<sup>18</sup>.

295

### 296 **Coregistration accuracy**

297 We assessed the neuroanatomic accuracy of the final registration results (i.e.  
298 the fit between structures on the normalized FLASH volumes versus the high-  
299 resolution MNI template) by visual inspection using a tool specifically designed  
300 for this task (implemented in Lead-DBS). An example of this visual inspection  
301 assessment for the subthalamic nucleus and globus pallidus interna is  
302 provided in Supplementary Fig. 3. The final maps are stored in NIfTI and mgz  
303 files in isotropic 150  $\mu$ m resolution (Data Citation 1). The normalized  
304 FLASH25 volume is additionally distributed pre-installed within Lead-DBS  
305 software and can be selected for visualization in the 3D viewer (Data Citation  
306 3). Fig. 6 shows an example in synopsis with deep brain stimulation electrode  
307 reconstructions in a hypothetical patient being treated for Parkinson's  
308 Disease.

## 309 **Acknowledgements**

310 We thank Michelle Siciliano and Terrence Ott for assistance in obtaining and  
311 processing the brain specimen. We thank Simon Sigalovsky for assistance  
312 with coil construction, and Gunjan Madan for assistance with coil testing and  
313 evaluation. We thank L. Daniel Bridgers for constructing the brain container and  
314 coil array housing. We thank Andrew Hoopes for assistance with creation of  
315 visual media. This work was supported by the NIH National Institute for  
316 Neurological Disorders and Stroke (K23-NS094538, R01-NS052585, R21-  
317 NS072652, R01-NS070963, R01-NS083534, U01-NS086625), the National  
318 Institute for Biomedical Imaging and Bioengineering (P41-EB015896, R01-  
319 EB006758, R21-EB018907, R01-EB019956, R01-EB023281, R00-  
320 EB021349), the National Institute on Aging (R01-AG057672, R01-AG022381,  
321 R01-AG008122, R01-AG016495, R01-AG008122, U01-AG006781, R21-  
322 AG046657, P41-RR014075, P50-AG005136), the National Center for  
323 Alternative Medicine (RC1-AT005728), the Eunice Kennedy Shriver National  
324 Institute of Child Health and Human Development (K01-HD074651, R01-  
325 HD071664, R00-HD074649), and the Centers for Disease Control and  
326 Prevention (R49-CE001171). This research also utilized resources provided  
327 by the National Center for Research Resources (U24-RR021382), Additional  
328 support was provided by the NIH Blueprint for Neuroscience Research (U01-  
329 MH093765), as part of the multi-institutional Human Connectome Project.  
330 This research also utilized resources provided by National Institutes of Health  
331 shared instrumentation grants S10-RR023401, S10-RR019307, and S10-  
332 RR023043. Additional support for this project comes from the James S.  
333 McDonnell Foundation, Rappaport Foundation, the Tiny Blue Dot Foundation

334 as well as the German Research Foundation (Emmy Noether Grant  
335 410169619).  
336

337 **Author contributions**

338 B.L.E. designed the study, analyzed the data, and prepared the manuscript.  
339 A.M. built the coil, acquired and analyzed the data, and contributed to the  
340 manuscript.  
341 A.H. created the warp from native space to standard stereotactic space,  
342 performed the coregistration for Lead-DBS implementation, and contributed to  
343 the manuscript.  
344 J.R.P. designed the study, acquired and analyzed the data, and contributed to  
345 the manuscript.  
346 M.D.T. acquired and analyzed the data, and contributed to the manuscript.  
347 J.A. designed the study, acquired and analyzed the data, and contributed to  
348 the manuscript.  
349 J.P.S. advised on the building and testing of the coil, and contributed to the  
350 manuscript.  
351 B.R.D. analyzed the data and contributed to the manuscript.  
352 A.S. acquired and analyzed the data, and contributed to the manuscript.  
353 L.S.T. processed and analyzed the data, and contributed to the manuscript.  
354 R.D.F. performed the pathological assessment and contributed to the  
355 manuscript.  
356 L.L.W. supervised the building of the coil and contributed to the manuscript.  
357 B.F. supervised and designed the study, analyzed the data, and contributed to  
358 the manuscript.  
359 A.v.d.K. supervised and designed the study, acquired and analyzed the data,  
360 and contributed to the manuscript.



361 **Additional Information**

362 **Competing interests**

363 None of the authors has a conflicting financial interest. Dr. Fischl and Mr.  
364 Tirrell have financial interest in CorticoMetrics, a company whose medical  
365 pursuits focus on brain imaging and measurement technologies. Their  
366 interests were reviewed and are managed by Massachusetts General Hospital  
367 and Partners HealthCare in accordance with their conflict of interest policies.

368 **Figures**

369

370 **Figure 1. Human brain specimen.** The human brain specimen that  
371 underwent *ex vivo* MRI is shown from inferior (**a**), superior (**b**), right lateral (**c**)  
372 and left lateral (**d**) perspectives. Gross pathological examination of the brain  
373 was normal.

374

375 **Figure 2. Receive array coil and transmit volume coil for *ex vivo* imaging**  
376 **of the whole human brain.** (**a**) The 31-channel receive array has 15  
377 elements on the top half (with a diameter of 5.5 cm) and 16 on the bottom half  
378 (with a diameter of 8.5 cm), each made of 16 AWG wire loops with four or five  
379 evenly spaced capacitors. All elements are tuned to 297.2 MHz. (**c**) The coil  
380 former has slightly larger dimensions than the brain holder, which slides inside  
381 a volume coil (**b**). (**d**) A custom air-tight brain holder was designed to conform  
382 to the shape of a whole human brain. The brain holder is an oblate spheroid  
383 container (16 x 19 cm) with degassing ports that are used to apply a vacuum  
384 suction, thereby reducing air bubbles in the specimen and surrounding fomblin  
385 solution.

386

387 **Figure 3. Comparison of FA25° acquisition and synthesized FLASH25**  
388 **volume.** Representative images from the FA25° acquisition (left column) and  
389 the synthesized FLASH25 volume (right column) are displayed in the sagittal  
390 (top row), coronal (middle row) and axial (bottom row) planes. These images  
391 provide a qualitative comparison of the respective signal-to-noise properties of

392 the FA25° acquisition (~25 hours) and the synthesized FLASH25 volume  
393 (~100 hours). All images are shown in radiologic convention.

394

395 **Figure 4. Delineation of subcortical neuroanatomy.** Representative axial  
396 sections from the synthesized FLASH25 volume are shown at the level of the  
397 rostral pons and caudal midbrain (**a-c**, see inset in panel **c**). Zoomed views of  
398 the brainstem, medial temporal lobe, and anterior cerebellum (within the white  
399 rectangles in **a-c**) are shown in the bottom row (**d-f**). The anatomic detail that  
400 can be visualized in this *ex vivo* 100  $\mu\text{m}$  resolution MRI dataset is beyond that  
401 which can be seen in typical *in vivo* MRI datasets. All images are shown in  
402 radiologic convention. Neuroanatomic abbreviations: Amg = amygdala; Cb =  
403 cerebellum; CP = cerebral peduncle; MB = mammillary body; P = pons; SCP =  
404 superior cerebellar peduncle; VTA = ventral tegmental area; xSCP =  
405 decussation of the superior cerebellar peduncle; Th = thalamus.

406

407 **Figure 5. Signal-to-noise ratio (SNR) analysis of coil performance.**

408 Representative SNR maps are shown in the sagittal (top row), coronal (middle  
409 row) and axial (bottom row) planes for a test brain sample immersed in  
410 periodate-lysine-paraformaldehyde. The maps demonstrate an SNR gain of  
411 1.6-fold for the 31-channel 7 Tesla (7T) *ex vivo* coil (left column) compared to  
412 the 31-channel 7T standard coil (middle row), and a gain of 3.3-fold compared  
413 to the 64-channel 3T head coil (right column). The noise coupling between  
414 channels was 11% for the 31-channel *ex vivo* coil array, a 2-fold improvement  
415 relative to our previous array<sup>18</sup>.

416

417 **Figure 6. Normalization of the *ex vivo* MRI dataset into standard**  
418 **stereotactic space and integration into the Lead-DBS software platform.**  
419 **(a)** Exemplary use-case of the normalized FLASH25 volume in deep brain  
420 stimulation (DBS). DBS electrodes are visualized for a hypothetical patient  
421 using Lead-DBS software (<https://www.lead-dbs.org>)<sup>29</sup>. An axial image from  
422 the normalized scan, at the level of the rostral midbrain, is shown as a  
423 backdrop, with 3D-structures defined by the DISTAL atlas<sup>32</sup> (right subthalamic  
424 and left red nucleus hidden for optimal visualization of the underlying  
425 anatomy). Panels **(b)** and **(c)** show zoomed views of key DBS target regions:  
426 the left globus pallidus interna (GPi in **b**) and the subthalamic nucleus (STN in  
427 **c**). The images in **(b)** and **(c)** are shown in radiologic convention.

428 **References**

- 429 1 Augustinack, J. C., van der Kouwe, A. J. & Fischl, B. Medial temporal  
430 cortices in ex vivo magnetic resonance imaging. *J Comp Neurol* **521**,  
431 4177-4188, doi:10.1002/cne.23432 (2013).
- 432 2 Edlow, B. L. *et al.* Neuroanatomic connectivity of the human ascending  
433 arousal system critical to consciousness and its disorders. *J*  
434 *Neuropathol Exp Neurol* **71**, 531-546,  
435 doi:10.1097/NEN.0b013e3182588293 (2012).
- 436 3 McNab, J. A. *et al.* The Human Connectome Project and beyond: Initial  
437 applications of 300mT/m gradients. *Neuroimage* **80**, 234-245,  
438 doi:10.1016/j.neuroimage.2013.05.074 (2013).
- 439 4 Roebroek, A., Miller, K. L. & Aggarwal, M. Ex vivo diffusion MRI of the  
440 human brain: Technical challenges and recent advances. *NMR Biomed*  
441 **32**, e3941, doi:10.1002/nbm.3941 (2019).
- 442 5 Aggarwal, M. *et al.* Feasibility of creating a high-resolution 3D diffusion  
443 tensor imaging based atlas of the human brainstem: a case study at  
444 11.7 T. *Neuroimage* **74**, 117-127,  
445 doi:10.1016/j.neuroimage.2013.01.061 (2013).
- 446 6 Lusebrink, F., Sciarra, A., Mattern, H., Yakupov, R. & Speck, O. T1-  
447 weighted in vivo human whole brain MRI dataset with an ultrahigh  
448 isotropic resolution of 250  $\mu\text{m}$ . *Sci Data* **4**, 170032,  
449 doi:10.1038/sdata.2017.32 (2017).
- 450 7 Horn, A. *et al.* Teaching NeuroImages: In vivo visualization of Edinger  
451 comb and Wilson pencils. *Neurology* **92**, e1663-e1664,  
452 doi:10.1212/WNL.0000000000007252 (2019).

- 453 8 Takahashi, E., Song, J. W., Folkerth, R. D., Grant, P. E. &  
454 Schmahmann, J. D. Detection of postmortem human cerebellar cortex  
455 and white matter pathways using high angular resolution diffusion  
456 tractography: a feasibility study. *Neuroimage* **68**, 105-111,  
457 doi:10.1016/j.neuroimage.2012.11.042 (2013).
- 458 9 Augustinack, J. C. *et al.* Detection of entorhinal layer II using 7Tesla  
459 [corrected] magnetic resonance imaging. *Ann Neurol* **57**, 489-494,  
460 doi:10.1002/ana.20426 (2005).
- 461 10 Gangolli, M. *et al.* Quantitative validation of a nonlinear histology-MRI  
462 coregistration method using generalized Q-sampling imaging in  
463 complex human cortical white matter. *Neuroimage* **153**, 152-167,  
464 doi:10.1016/j.neuroimage.2017.03.059 (2017).
- 465 11 van Veluw, S. J. *et al.* Microbleed and microinfarct detection in amyloid  
466 angiopathy: a high-resolution MRI-histopathology study. *Brain* **139**,  
467 3151-3162, doi:10.1093/brain/aww229 (2016).
- 468 12 Sengupta, S. *et al.* High resolution anatomical and quantitative MRI of  
469 the entire human occipital lobe ex vivo at 9.4T. *Neuroimage* **168**, 162-  
470 171, doi:10.1016/j.neuroimage.2017.03.039 (2018).
- 471 13 van der Kouwe, A. *et al.* High Resolution Structural and Diffusion MRI  
472 of Ex Vivo Human Motor Cortex. *Organization for Human Brain*  
473 *Mapping* (2011).
- 474 14 Mareyam, A. *et al.* Array coil and sample preparation and support  
475 system for whole brain ex vivo imaging at 100  $\mu$ m. *ISMRM*. #3130  
476 (2015).
- 477 15 Edlow, B. L. *et al.* Multimodal Characterization of the Late Effects of  
478 Traumatic Brain Injury: A Methodological Overview of the Late Effects

- 479 of Traumatic Brain Injury Project. *J Neurotrauma* **35**, 1604-1619,  
480 doi:10.1089/neu.2017.5457 (2018).
- 481 16 Bridgers, L. D. *Design and Manufacture of an Ultra-High Field Ex Vivo*  
482 *Coil Assembly*, Massachusetts Institute of Technology, (2012).
- 483 17 Keil, B. *et al.* Size-optimized 32-channel brain arrays for 3 T pediatric  
484 imaging. *Magn Reson Med* **66**, 1777-1787, doi:10.1002/mrm.22961  
485 (2011).
- 486 18 Mareyam, A., Polimeni, J. R., Alagappan, V., Fischl, B. & Wald, L. L. A  
487 30 channel receive-only 7T array for ex vivo brain hemisphere imaging.  
488 *ISMRM. #106* (2009).
- 489 19 Fischl, B. *et al.* Sequence-independent segmentation of magnetic  
490 resonance images. *Neuroimage* **23 Suppl 1**, S69-84,  
491 doi:10.1016/j.neuroimage.2004.07.016 (2004).
- 492 20 Frigo, M. & Johnson, S. G. The Design and Implementation of FFTW3.  
493 *Proceedings of the IEEE* **93**, 216-231 (2005).
- 494 21 Deoni, S. C., Peters, T. M. & Rutt, B. K. High-resolution T1 and T2  
495 mapping of the brain in a clinically acceptable time with DESPOT1 and  
496 DESPOT2. *Magn Reson Med* **53**, 237-241, doi:10.1002/mrm.20314  
497 (2005).
- 498 22 Tovi, M. & Ericsson, A. Measurements of T1 and T2 over time in  
499 formalin-fixed human whole-brain specimens. *Acta Radiol* **33**, 400-404  
500 (1992).
- 501 23 Eickhoff, S. *et al.* High-resolution MRI reflects myeloarchitecture and  
502 cytoarchitecture of human cerebral cortex. *Hum Brain Mapp* **24**, 206-  
503 215, doi:10.1002/hbm.20082 (2005).

- 504 24 Fukunaga, M. *et al.* Layer-specific variation of iron content in cerebral  
505 cortex as a source of MRI contrast. *Proc Natl Acad Sci U S A* **107**,  
506 3834-3839, doi:10.1073/pnas.0911177107 (2010).
- 507 25 Stuber, C. *et al.* Myelin and iron concentration in the human brain: a  
508 quantitative study of MRI contrast. *Neuroimage* **93 Pt 1**, 95-106,  
509 doi:10.1016/j.neuroimage.2014.02.026 (2014).
- 510 26 Fonov, V. S., Evans, A. C., McKinstry, R. C., Almli, C. R. & Collins, D.  
511 Unbiased nonlinear average age-appropriate brain templates from birth  
512 to adulthood. *Neuroimage* **47**, S102 (2009).
- 513 27 Horn, A. PCA MNI 2009b NLIN template. (2017).  
514 <doi:10.6084/m9.figshare.4644472.v2>.
- 515 28 Avants, B. B., Epstein, C. L., Grossman, M. & Gee, J. C. Symmetric  
516 diffeomorphic image registration with cross-correlation: evaluating  
517 automated labeling of elderly and neurodegenerative brain. *Medical*  
518 *image analysis* **12**, 26-41, doi:10.1016/j.media.2007.06.004 (2008).
- 519 29 Horn, A. *et al.* Lead-DBS v2: Towards a comprehensive pipeline for  
520 deep brain stimulation imaging. *Neuroimage* **184**, 293-316,  
521 doi:10.1016/j.neuroimage.2018.08.068 (2019).
- 522 30 Kellman, P. & McVeigh, E. R. Image reconstruction in SNR units: a  
523 general method for SNR measurement. *Magn Reson Med* **54**, 1439-  
524 1447, doi:10.1002/mrm.20713 (2005).
- 525 31 Yarnykh, V. L. Actual flip-angle imaging in the pulsed steady state: a  
526 method for rapid three-dimensional mapping of the transmitted  
527 radiofrequency field. *Magn Reson Med* **57**, 192-200,  
528 doi:10.1002/mrm.21120 (2007).



529 32 Ewert, S. *et al.* Toward defining deep brain stimulation targets in MNI  
530 space: A subcortical atlas based on multimodal MRI, histology and  
531 structural connectivity. *Neuroimage* **170**, 271-282,  
532 doi:10.1016/j.neuroimage.2017.05.015 (2018).

533

534 **Data Citations**

- 535 1. Edlow, B.L., Mareyam, A., Horn, A., Polimeni, J.R., Tisdall M.D.,  
536 Augustinack, J., Stockmann, J.P., Diamond B.R., Stevens A., Tirrell, L.,  
537 Folkerth, R.D., Wald, L.L., Fischl, B. & Kouwe, A.v.d. *Dryad Digital*  
538 *Repository*. <https://datadryad.org>. doi:10.5061/dryad.119f80q (2019).  
539
- 540 2. Edlow, B.L., Mareyam, A., Horn, A., Polimeni, J.R., Tisdall M.D.,  
541 Augustinack, J., Stockmann, J.P., Diamond B.R., Stevens A., Tirrell, L.,  
542 Folkerth, R.D., Wald, L.L., Fischl, B. & Kouwe, A.v.d. *Biolumida*  
543 <https://histopath.nmr.mgh.harvard.edu> (2019).  
544
- 545 3. Edlow, B.L., Mareyam, A., Horn, A., Polimeni, J.R., Tisdall M.D.,  
546 Augustinack, J., Stockmann, J.P., Diamond B.R., Stevens A., Tirrell, L.,  
547 Folkerth, R.D., Wald, L.L., Fischl, B. & Kouwe, A.v.d. *Lead-DBS*  
548 <https://www.lead-dbs.org> (2019).

549

550 **Videos**

551

552 **Video 1. Axial images from the FA25° acquisition.** These images were  
553 acquired in ~25 hours of scan time. The images are shown in radiologic  
554 convention.

555

556 **Video 2. Coronal images from the FA25° acquisition.** These images were  
557 acquired in ~25 hours of scan time. The images are shown in radiologic  
558 convention.

559

560 **Video 3. Sagittal images from the FA25° acquisition.** These images were  
561 acquired in ~25 hours of scan time.

562

563 **Video 4. Axial images from the synthesized FLASH25 volume.** These  
564 images were acquired in ~100 hours of scan time. The images are shown in  
565 radiologic convention.

566

567 **Video 5. Coronal images from the synthesized FLASH25 volume.** These  
568 images were acquired in ~100 hours of scan time. The images are shown in  
569 radiologic convention.

570

571 **Video 6. Sagittal images from the synthesized FLASH25 volume.** These  
572 images were acquired in ~100 hours of scan time.



a

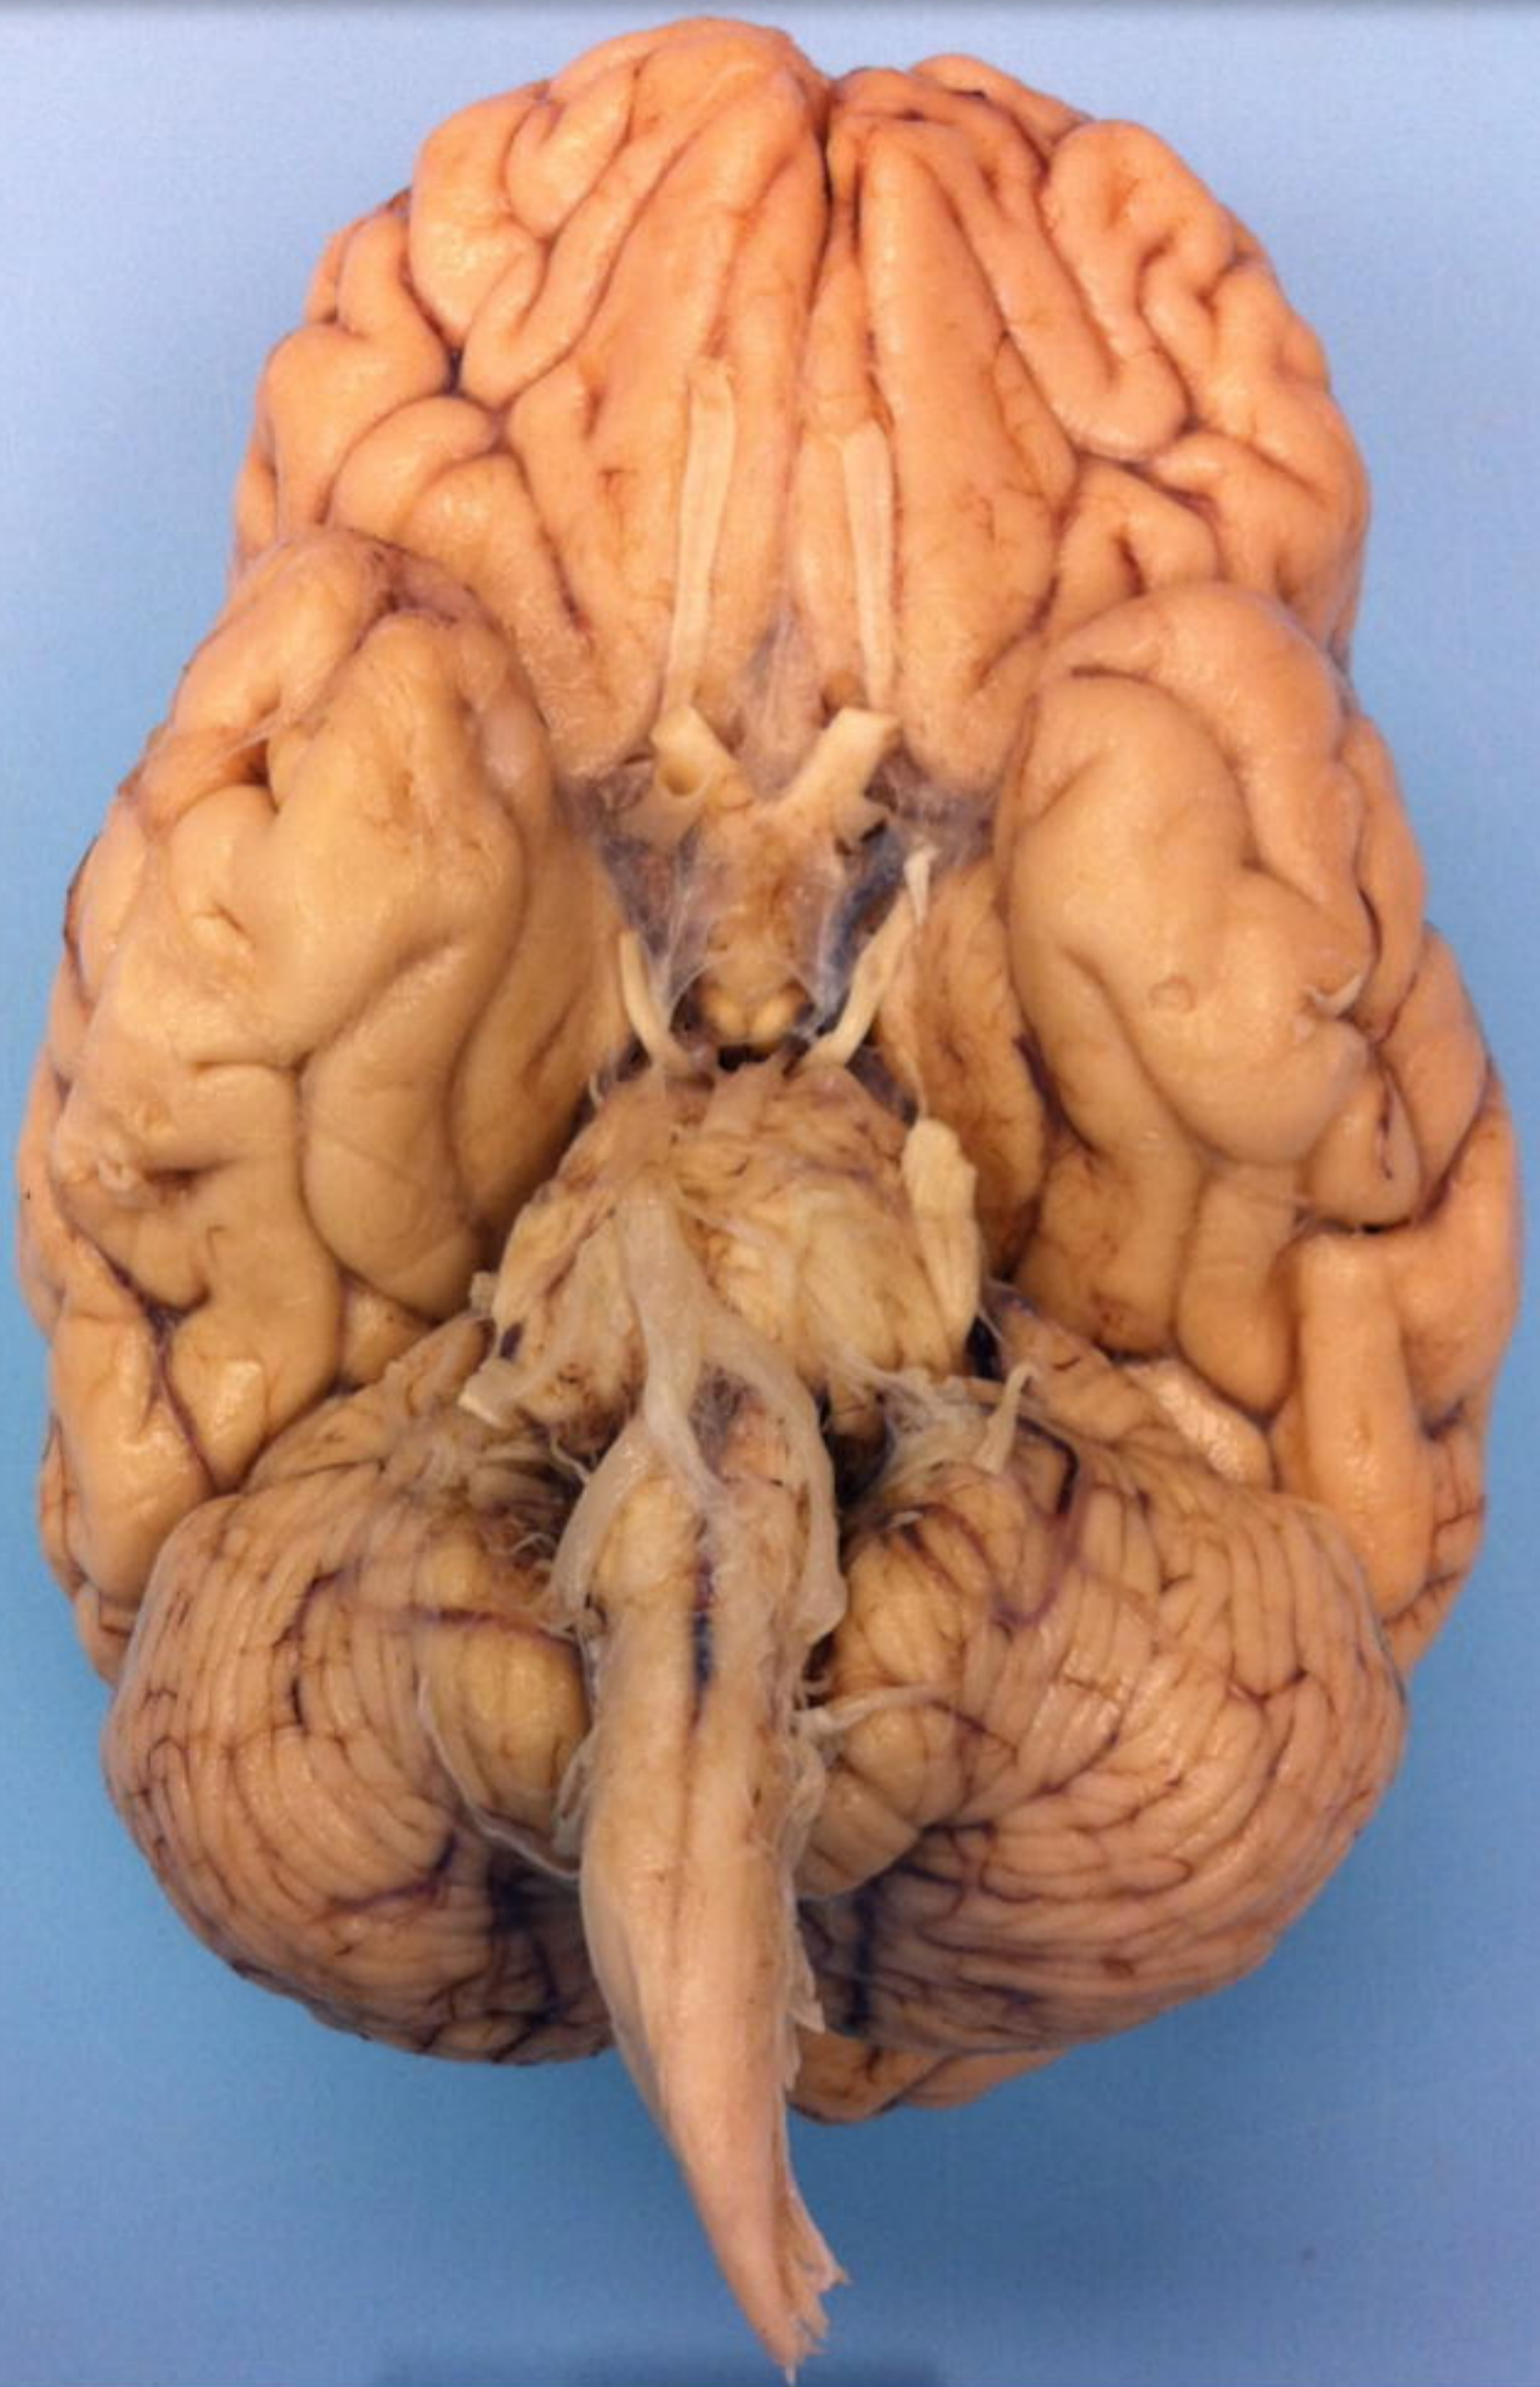

b

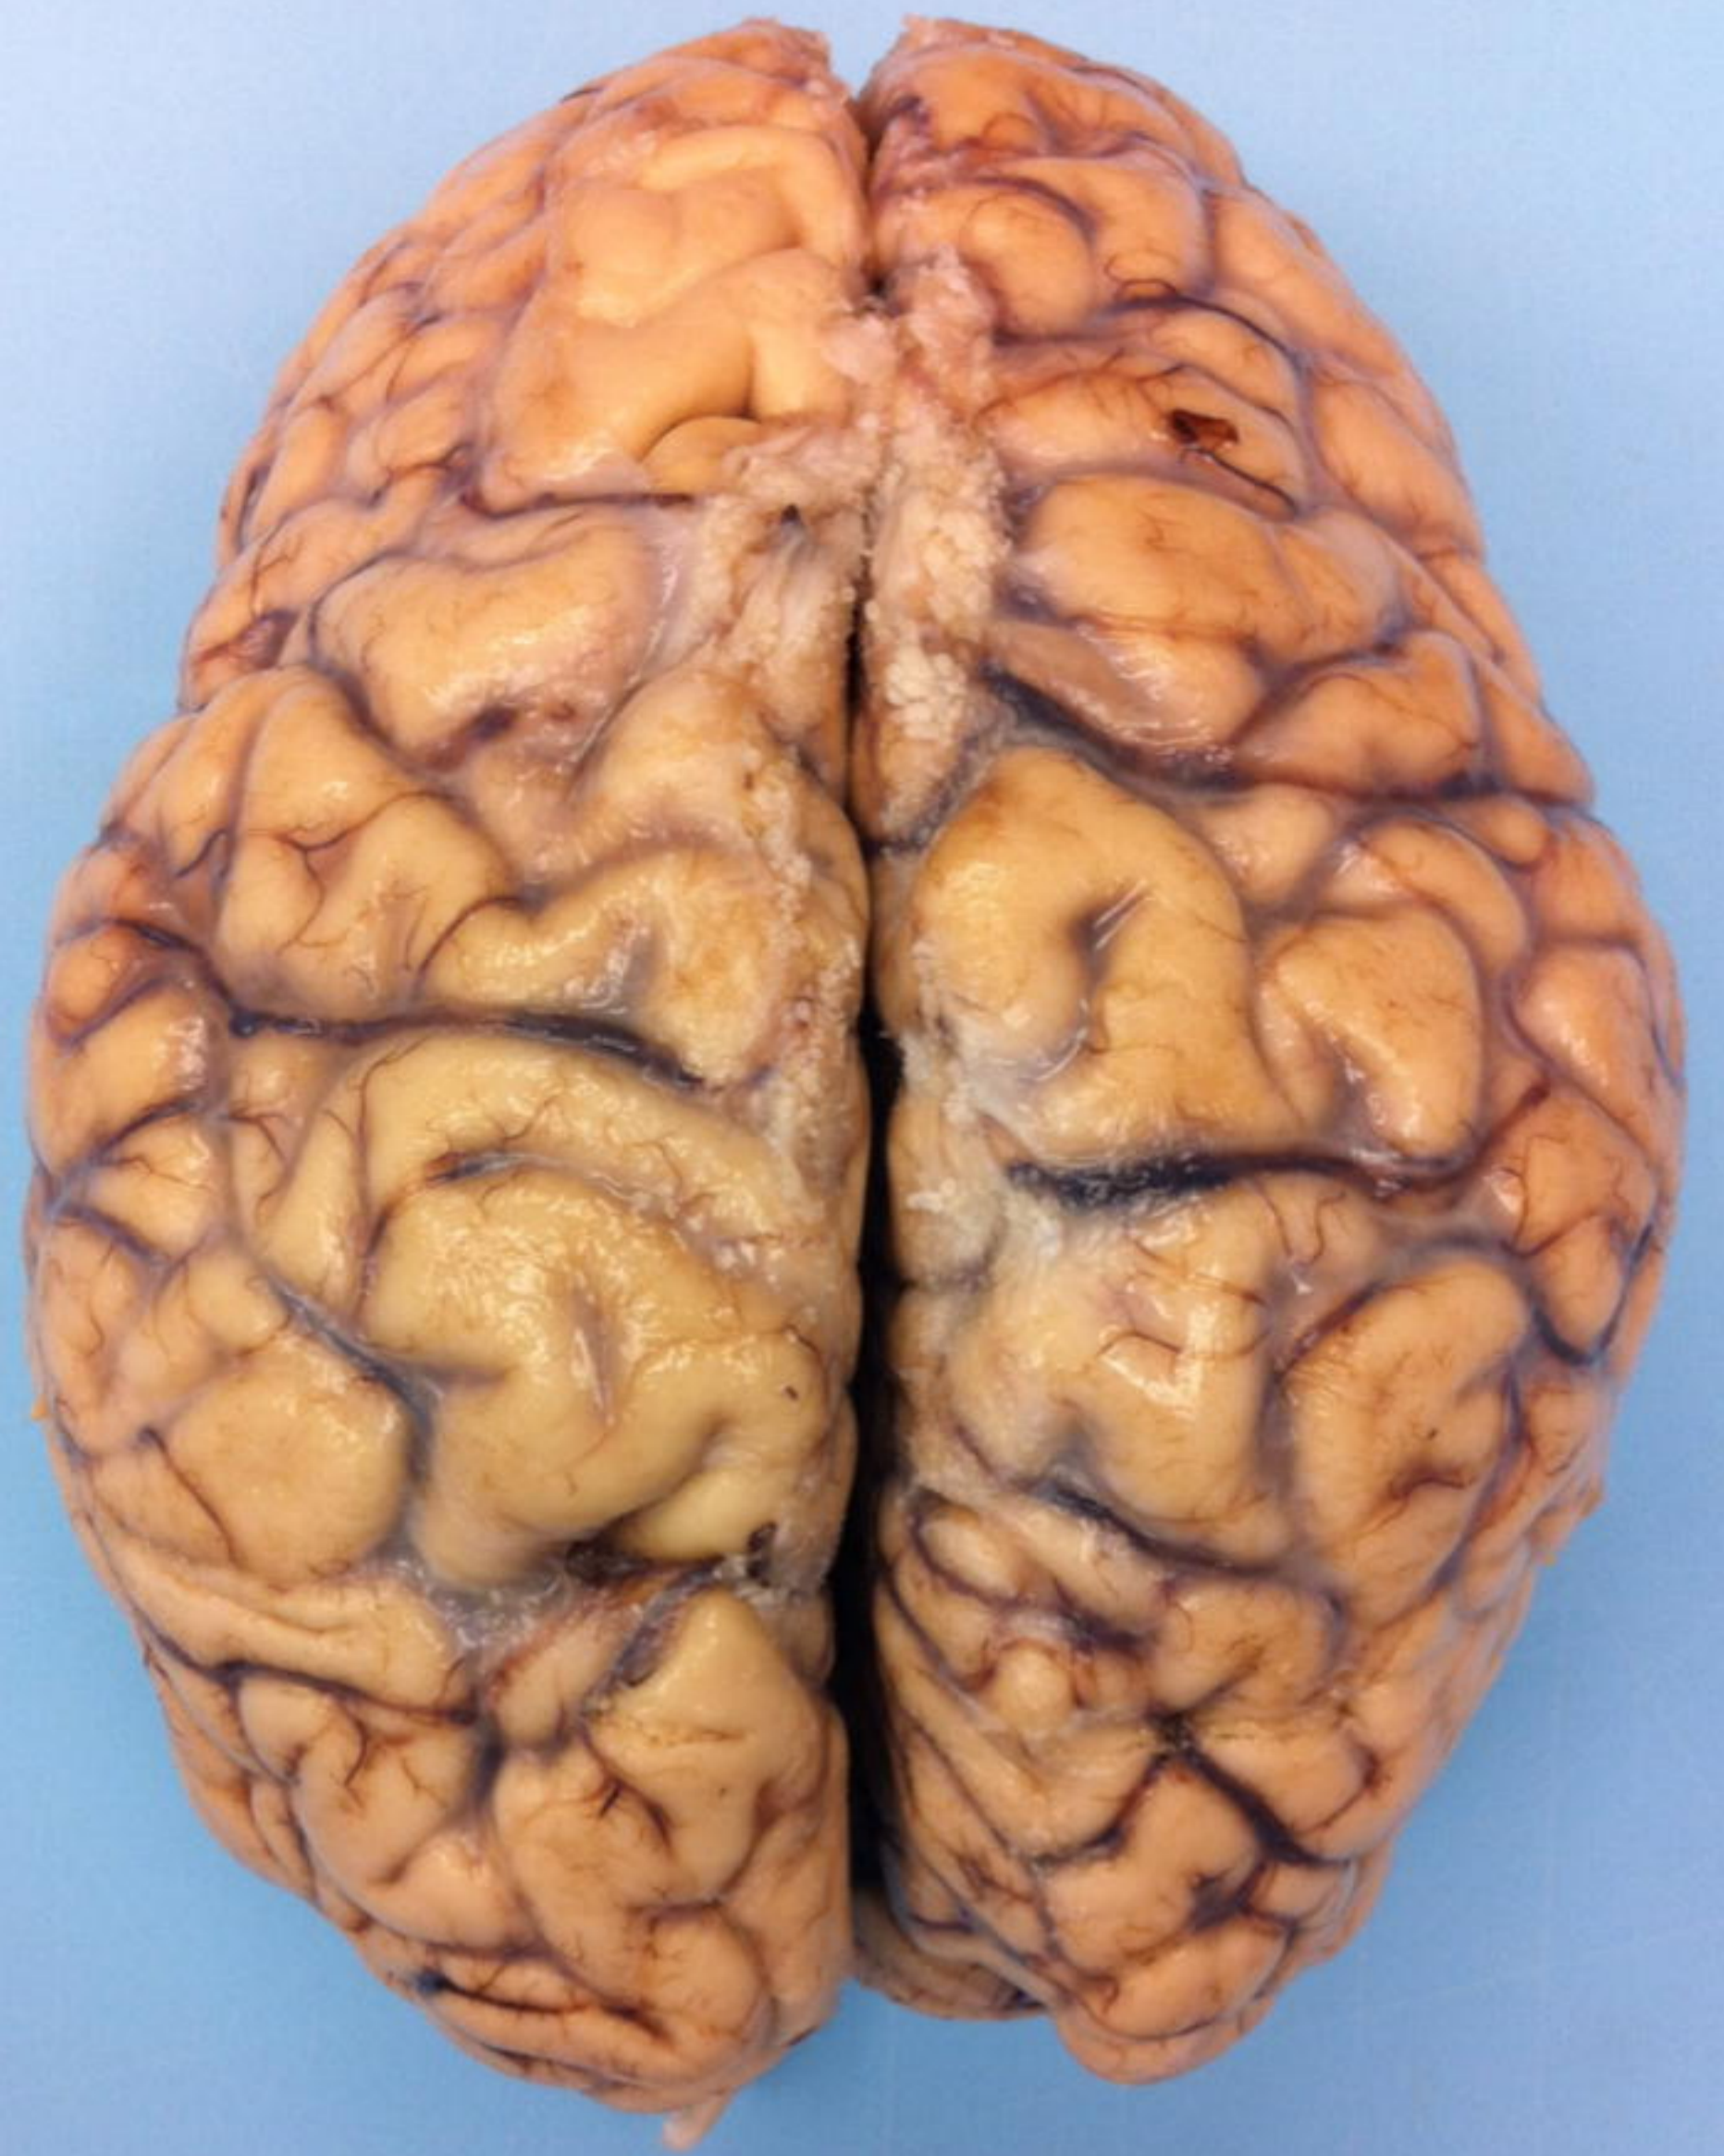

c

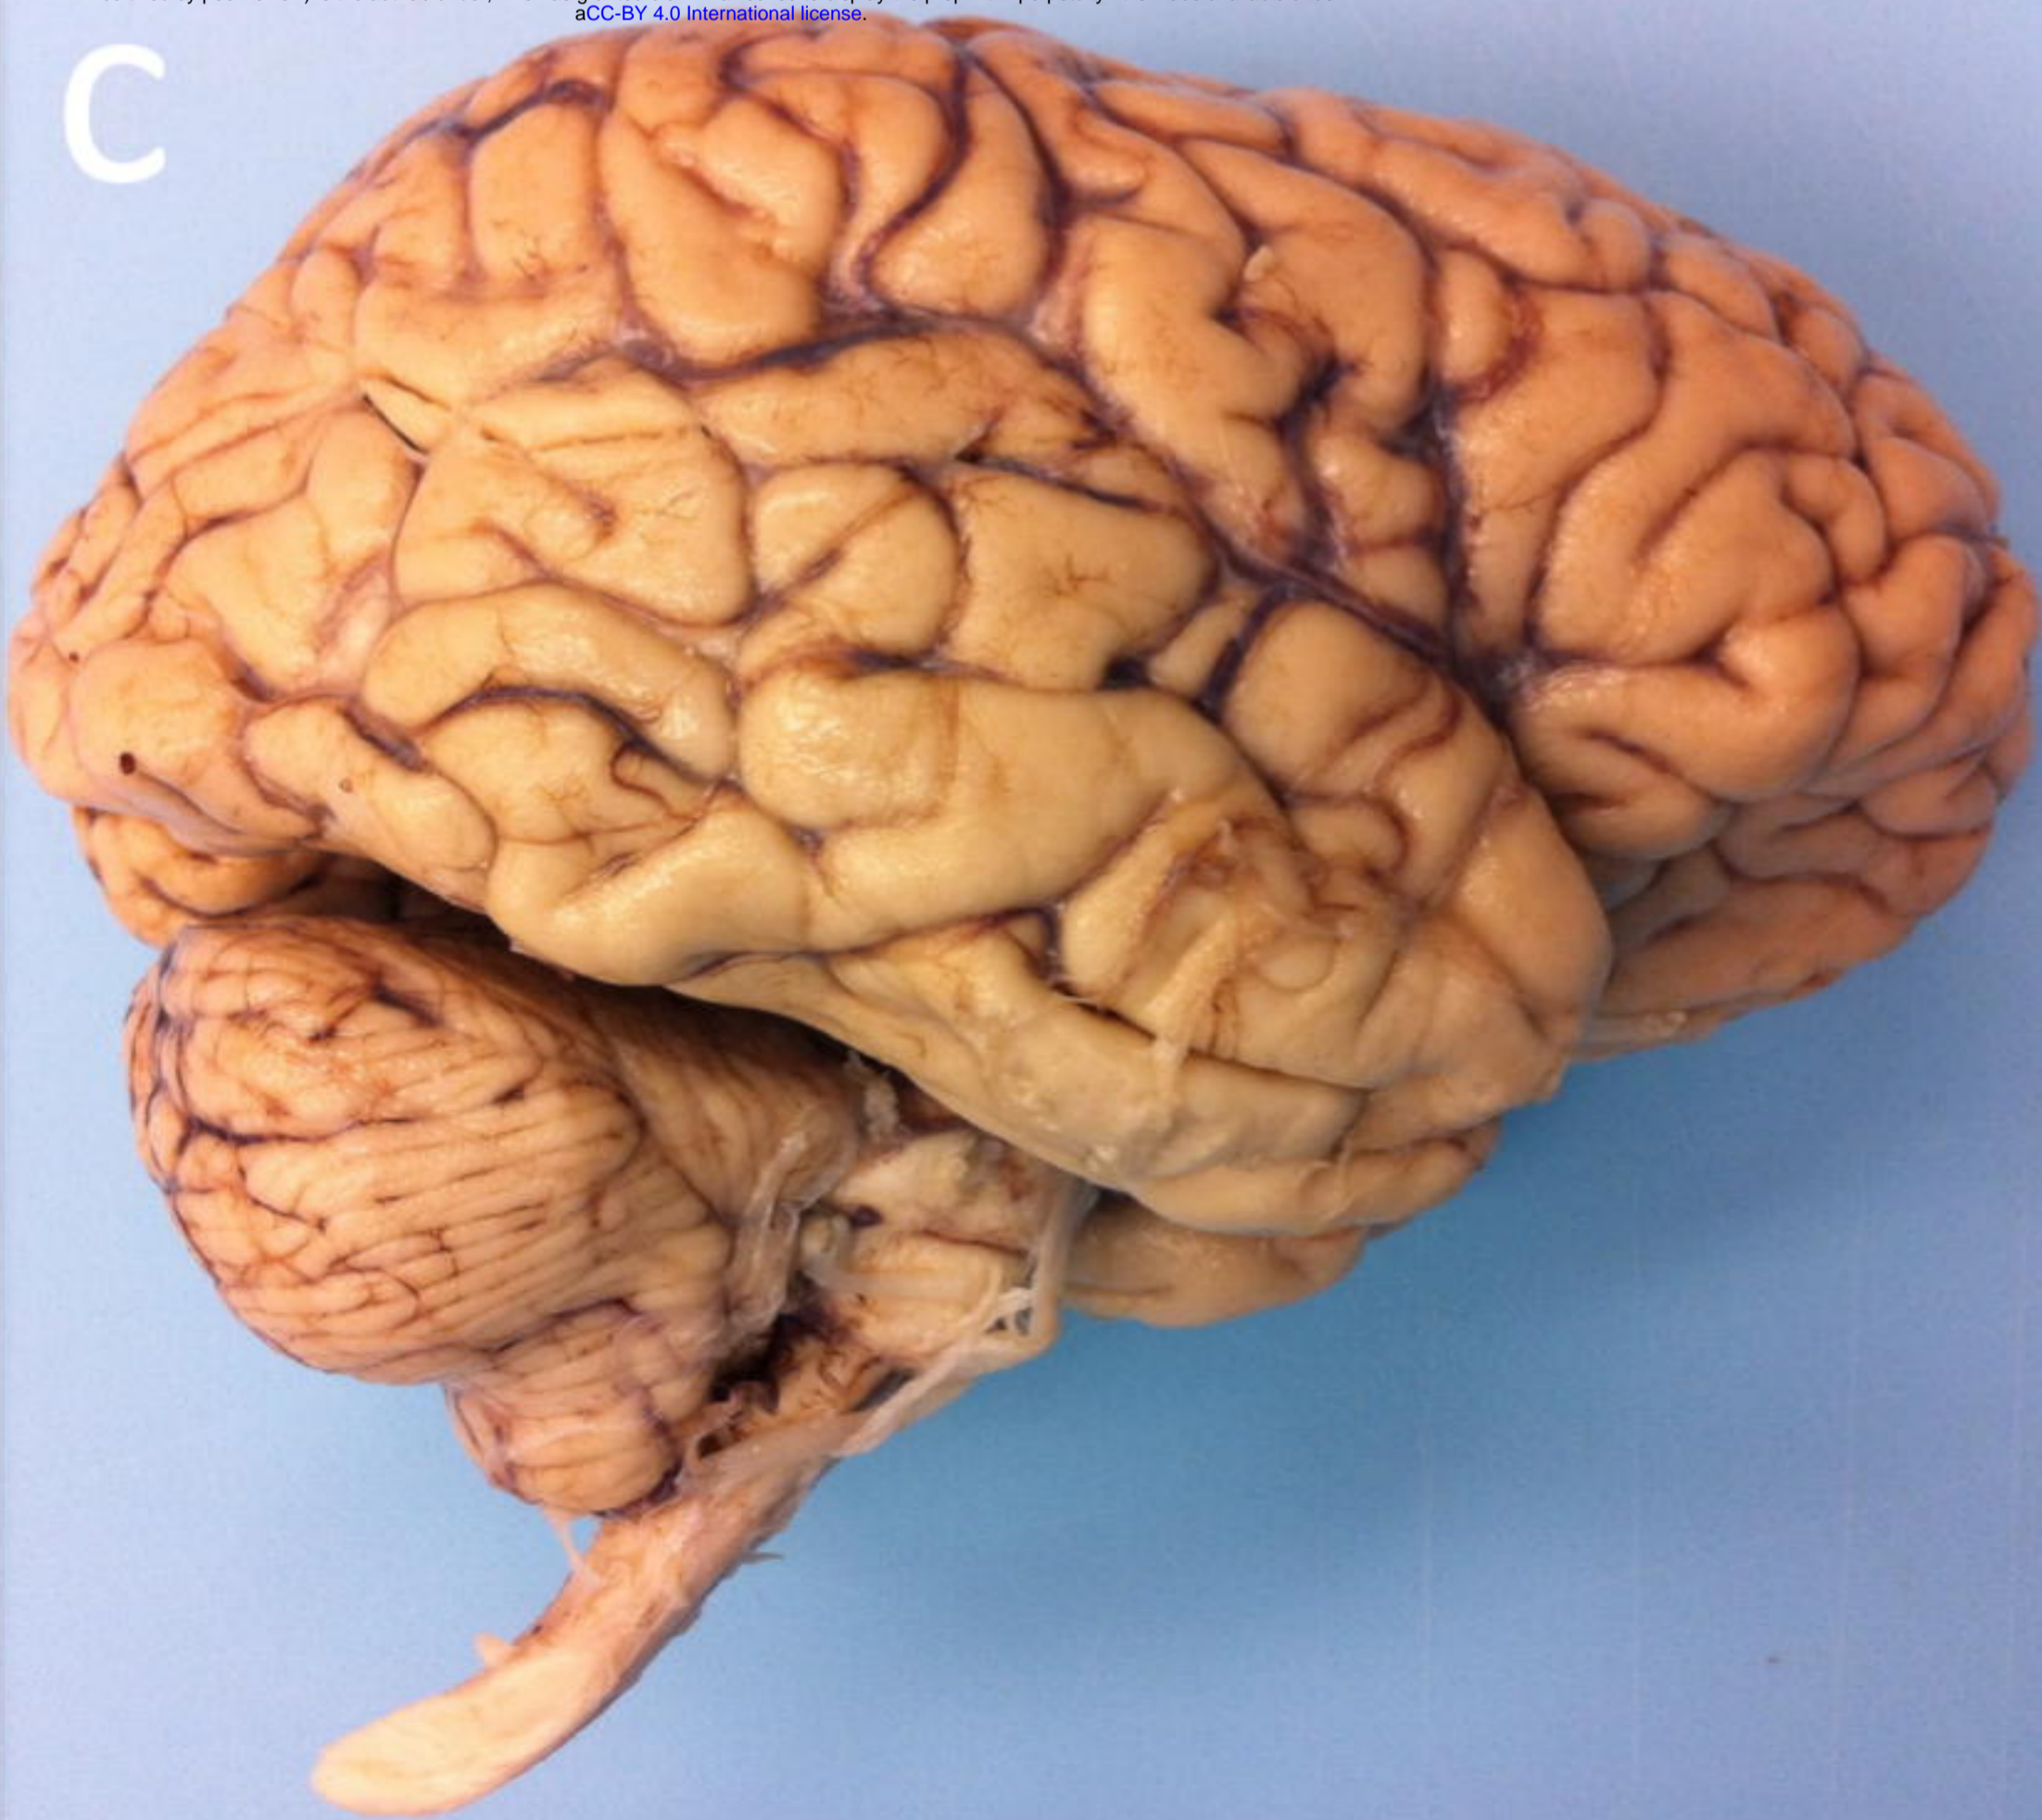

d

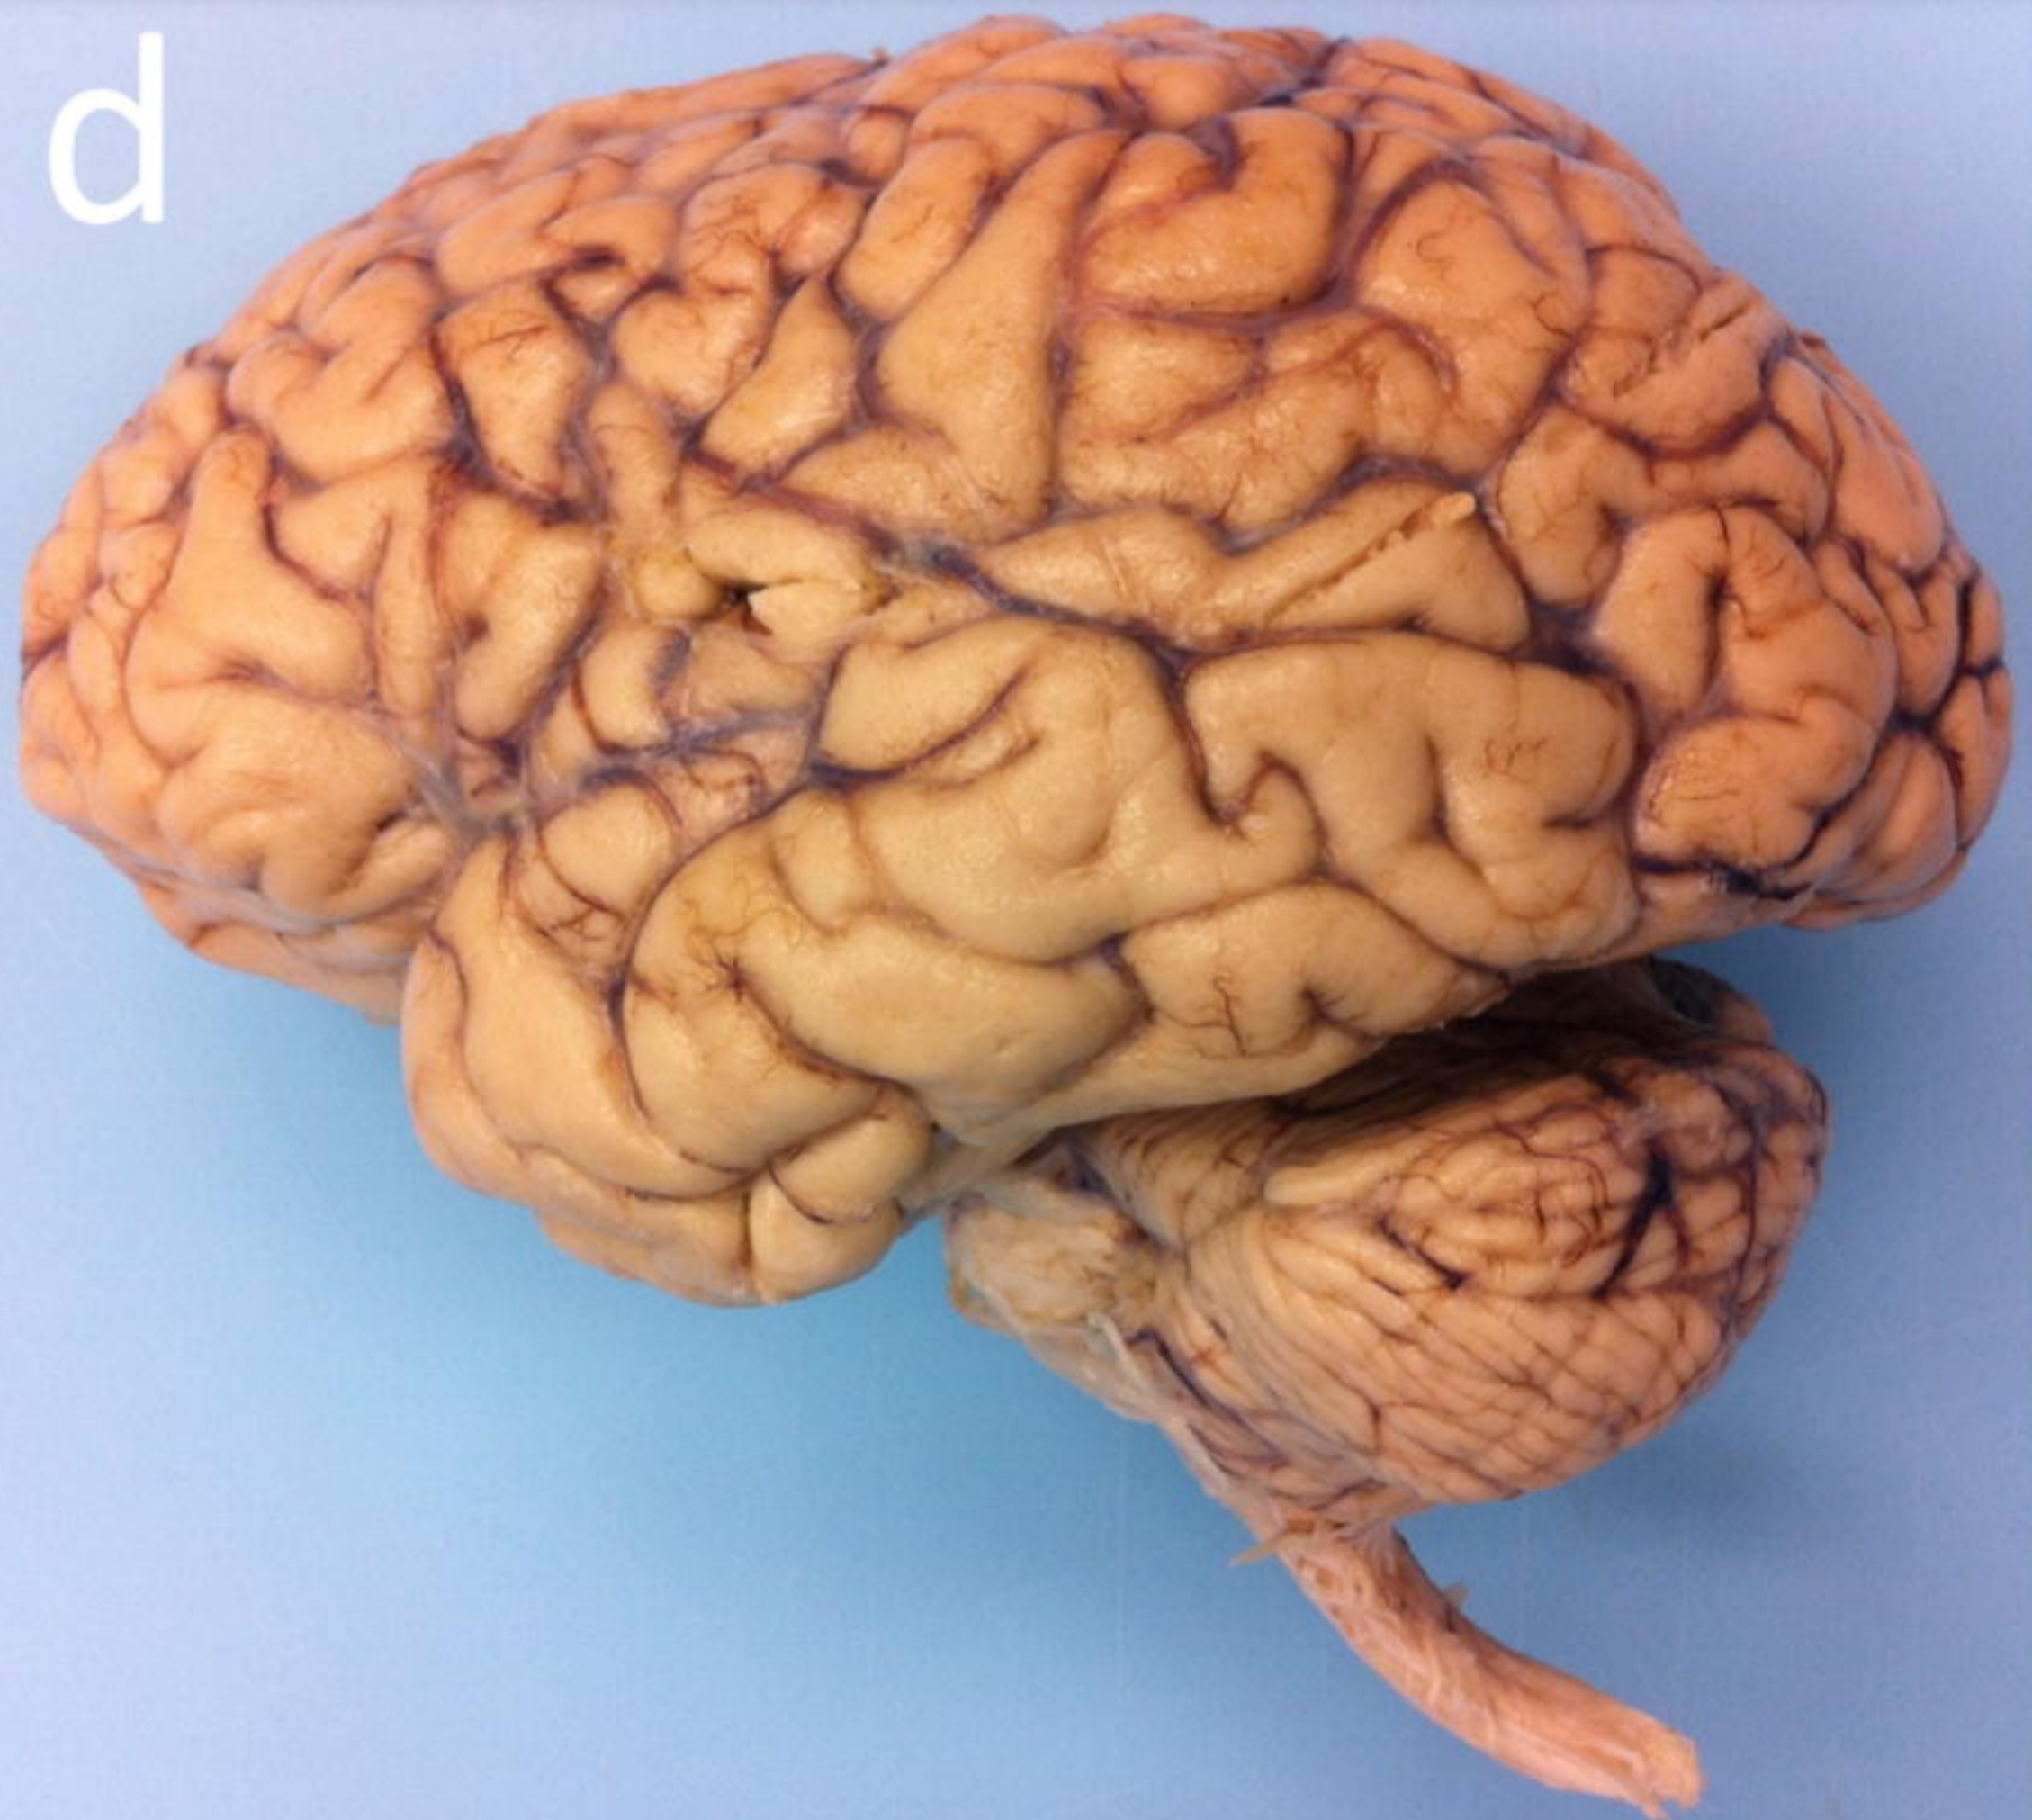



**a**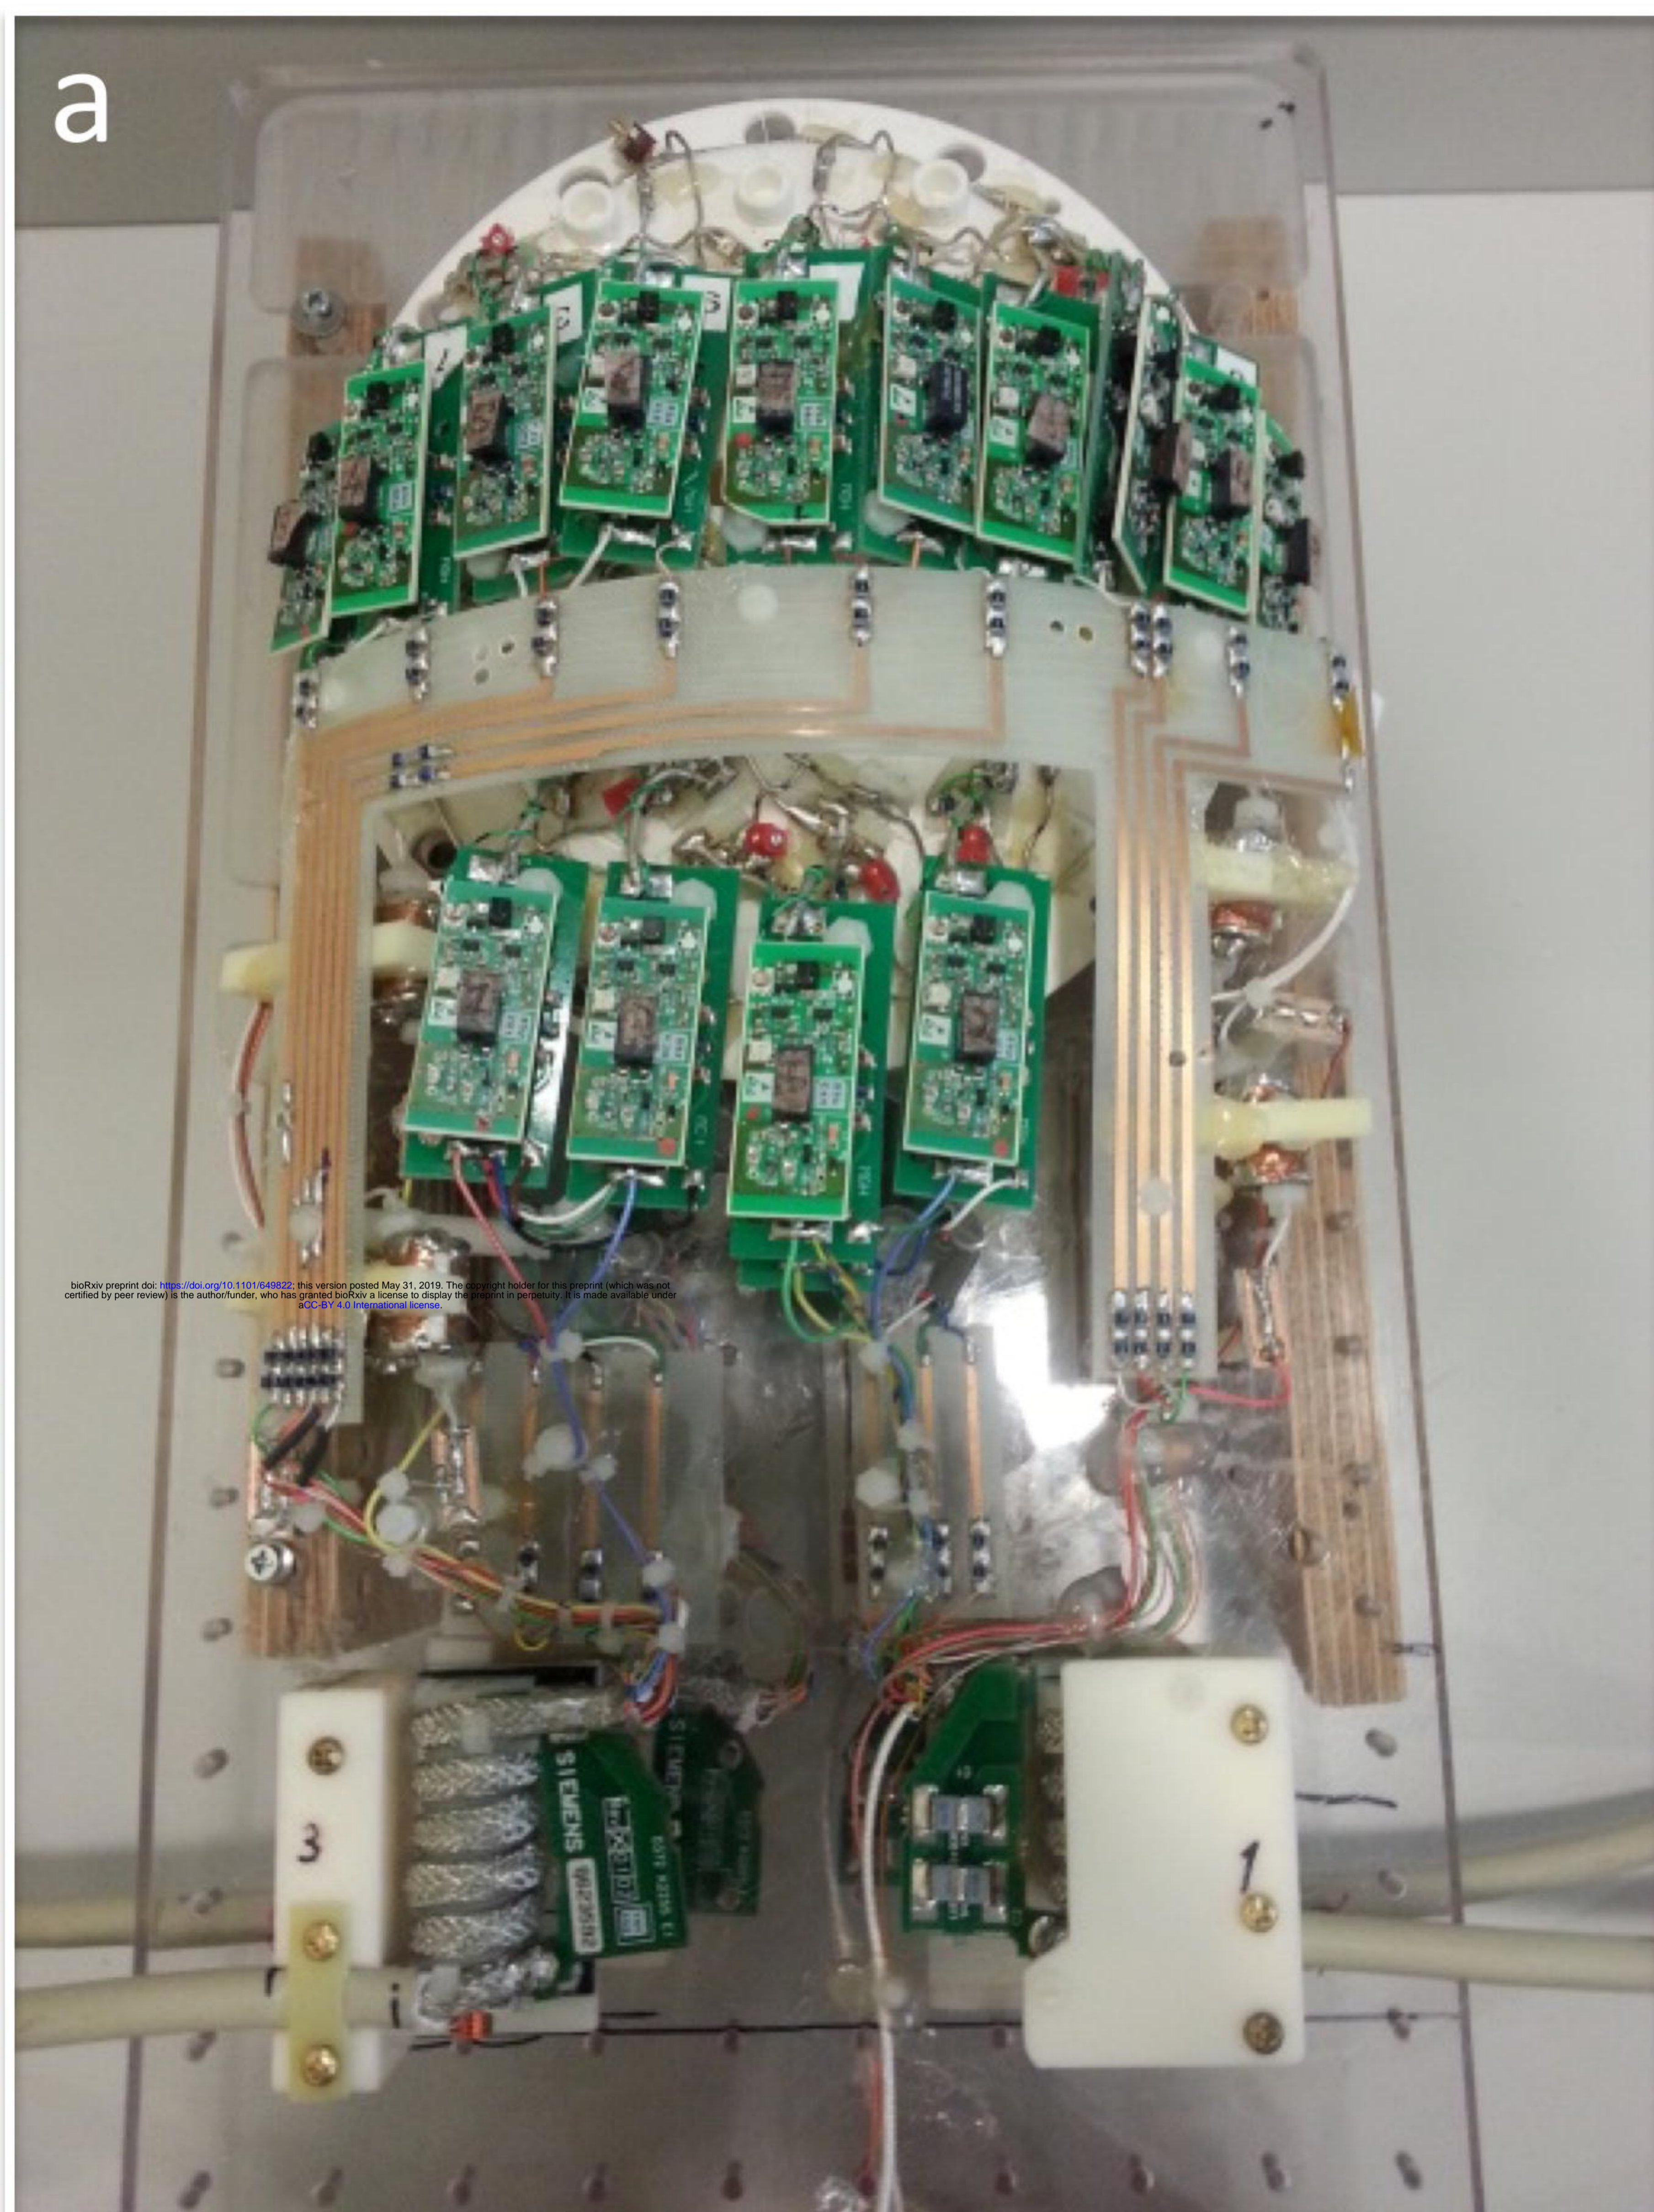**b**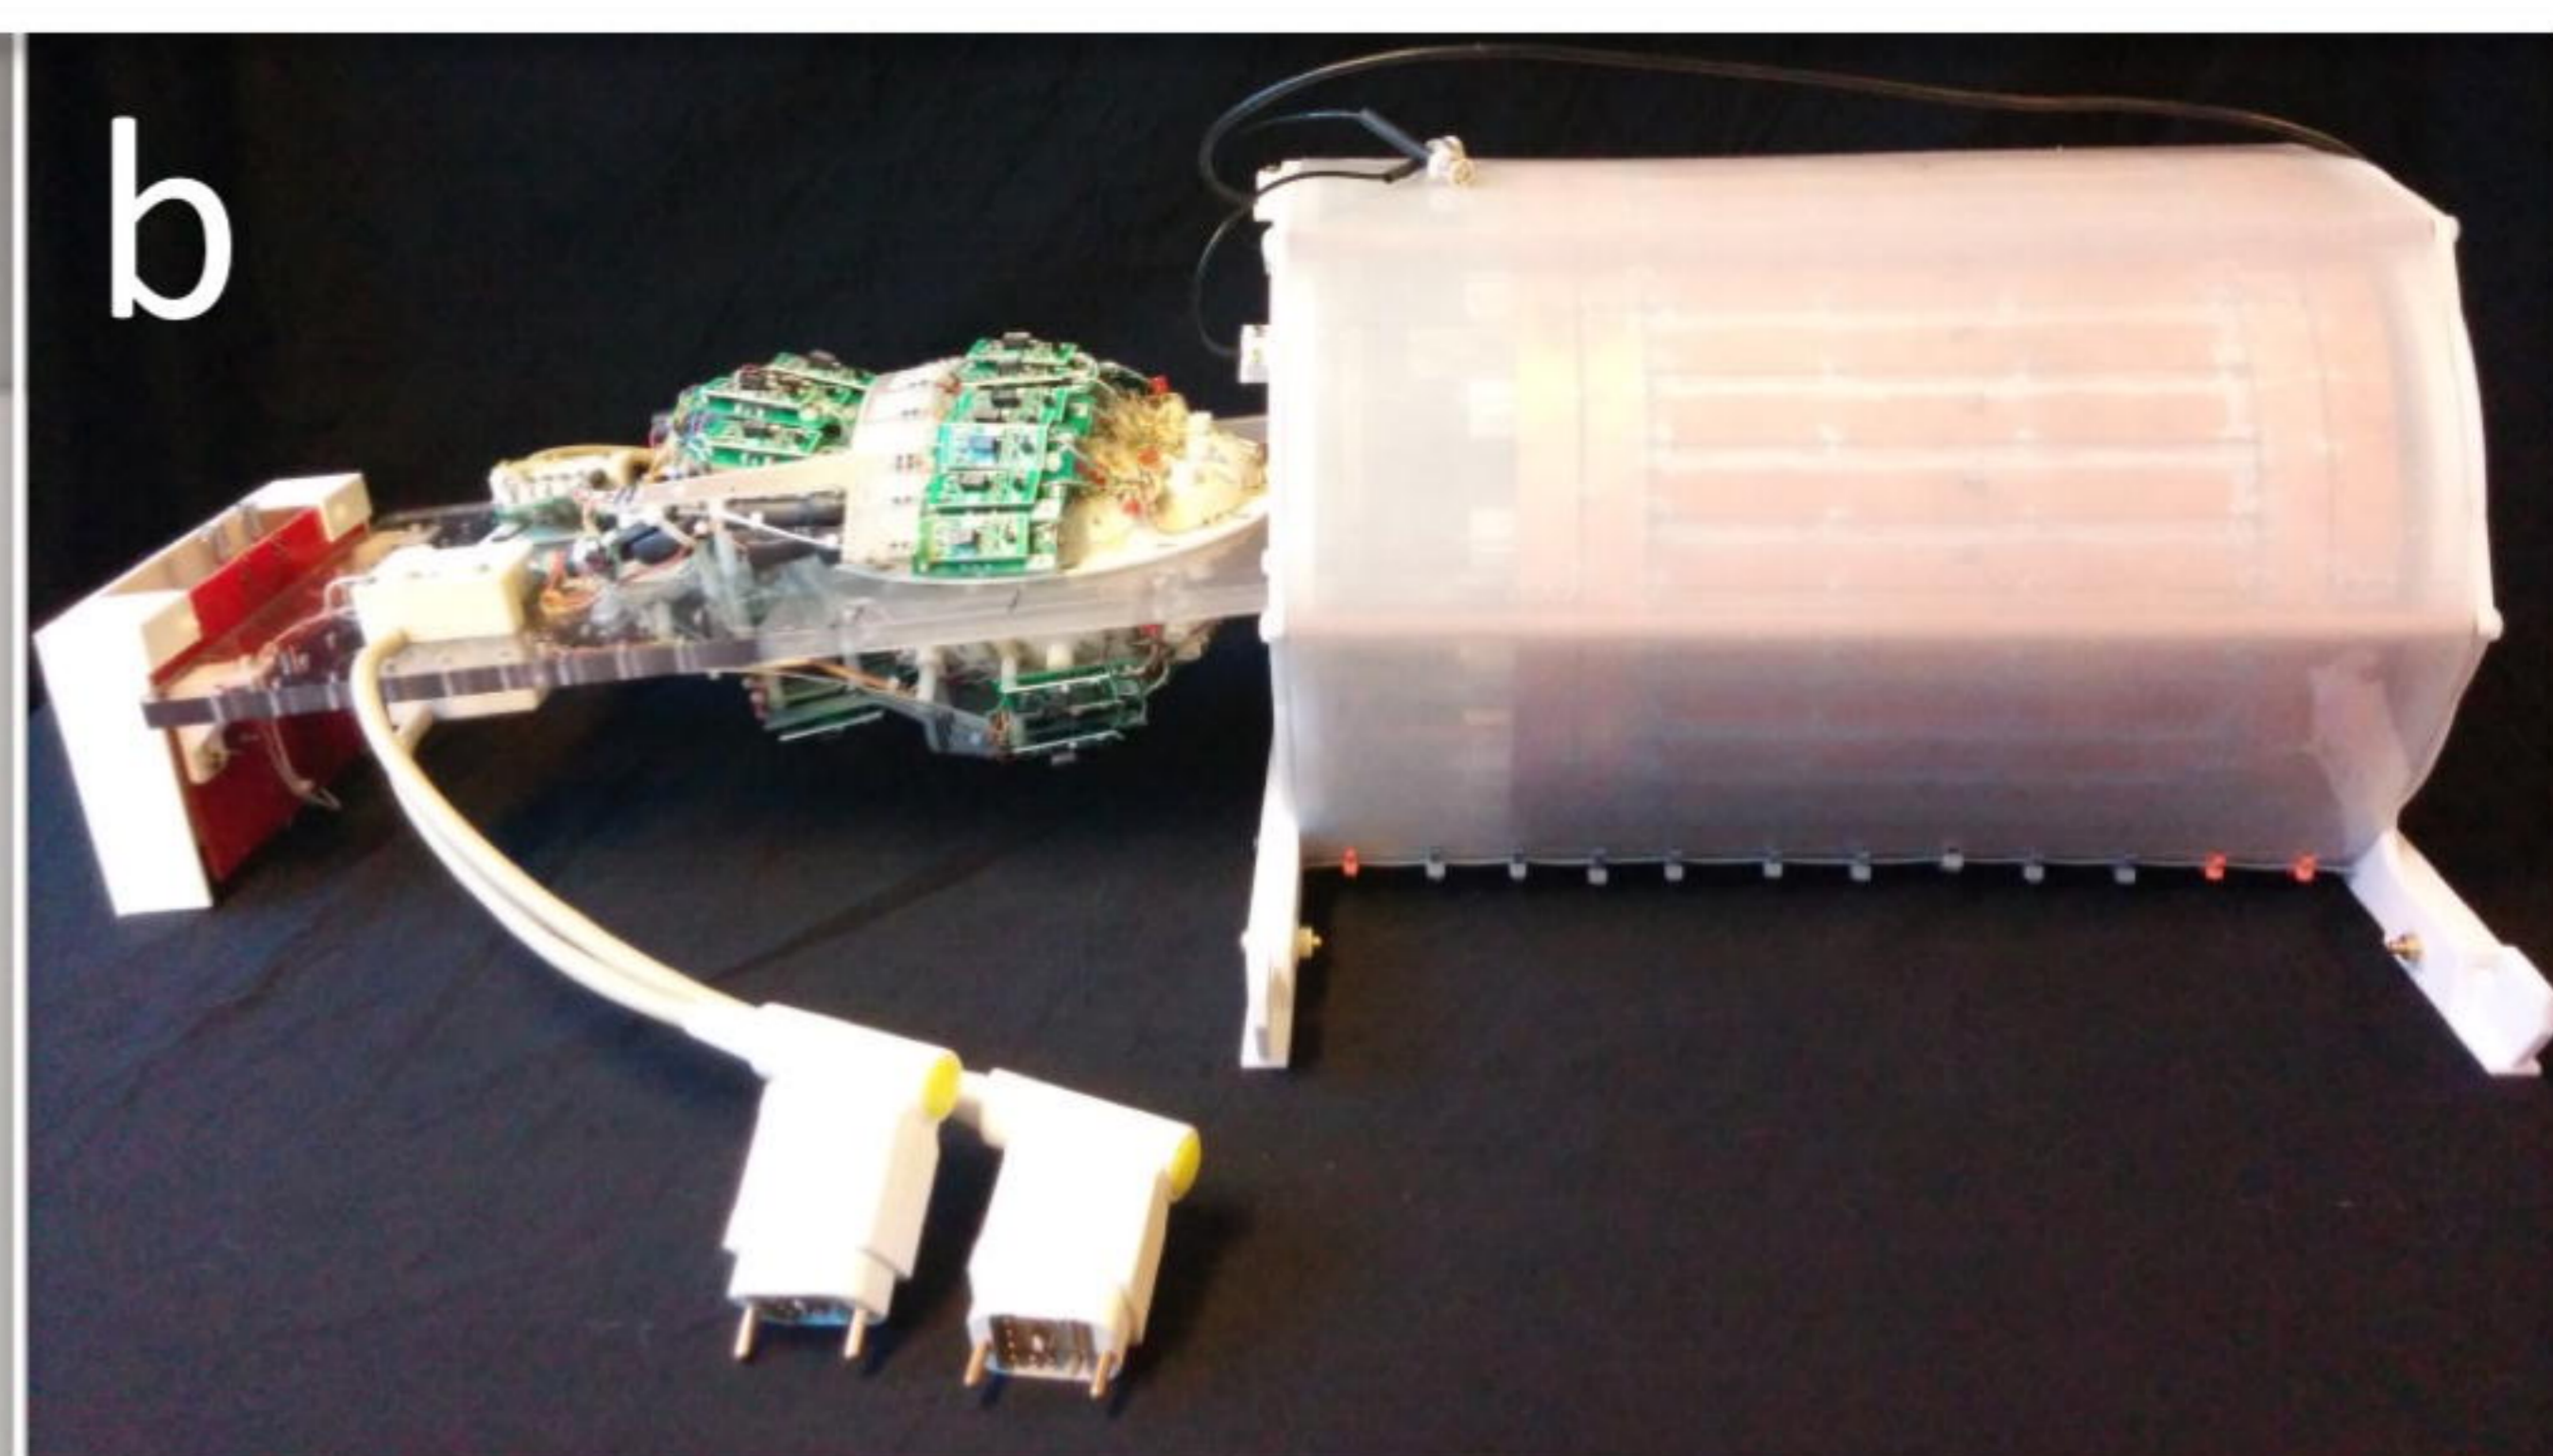**c**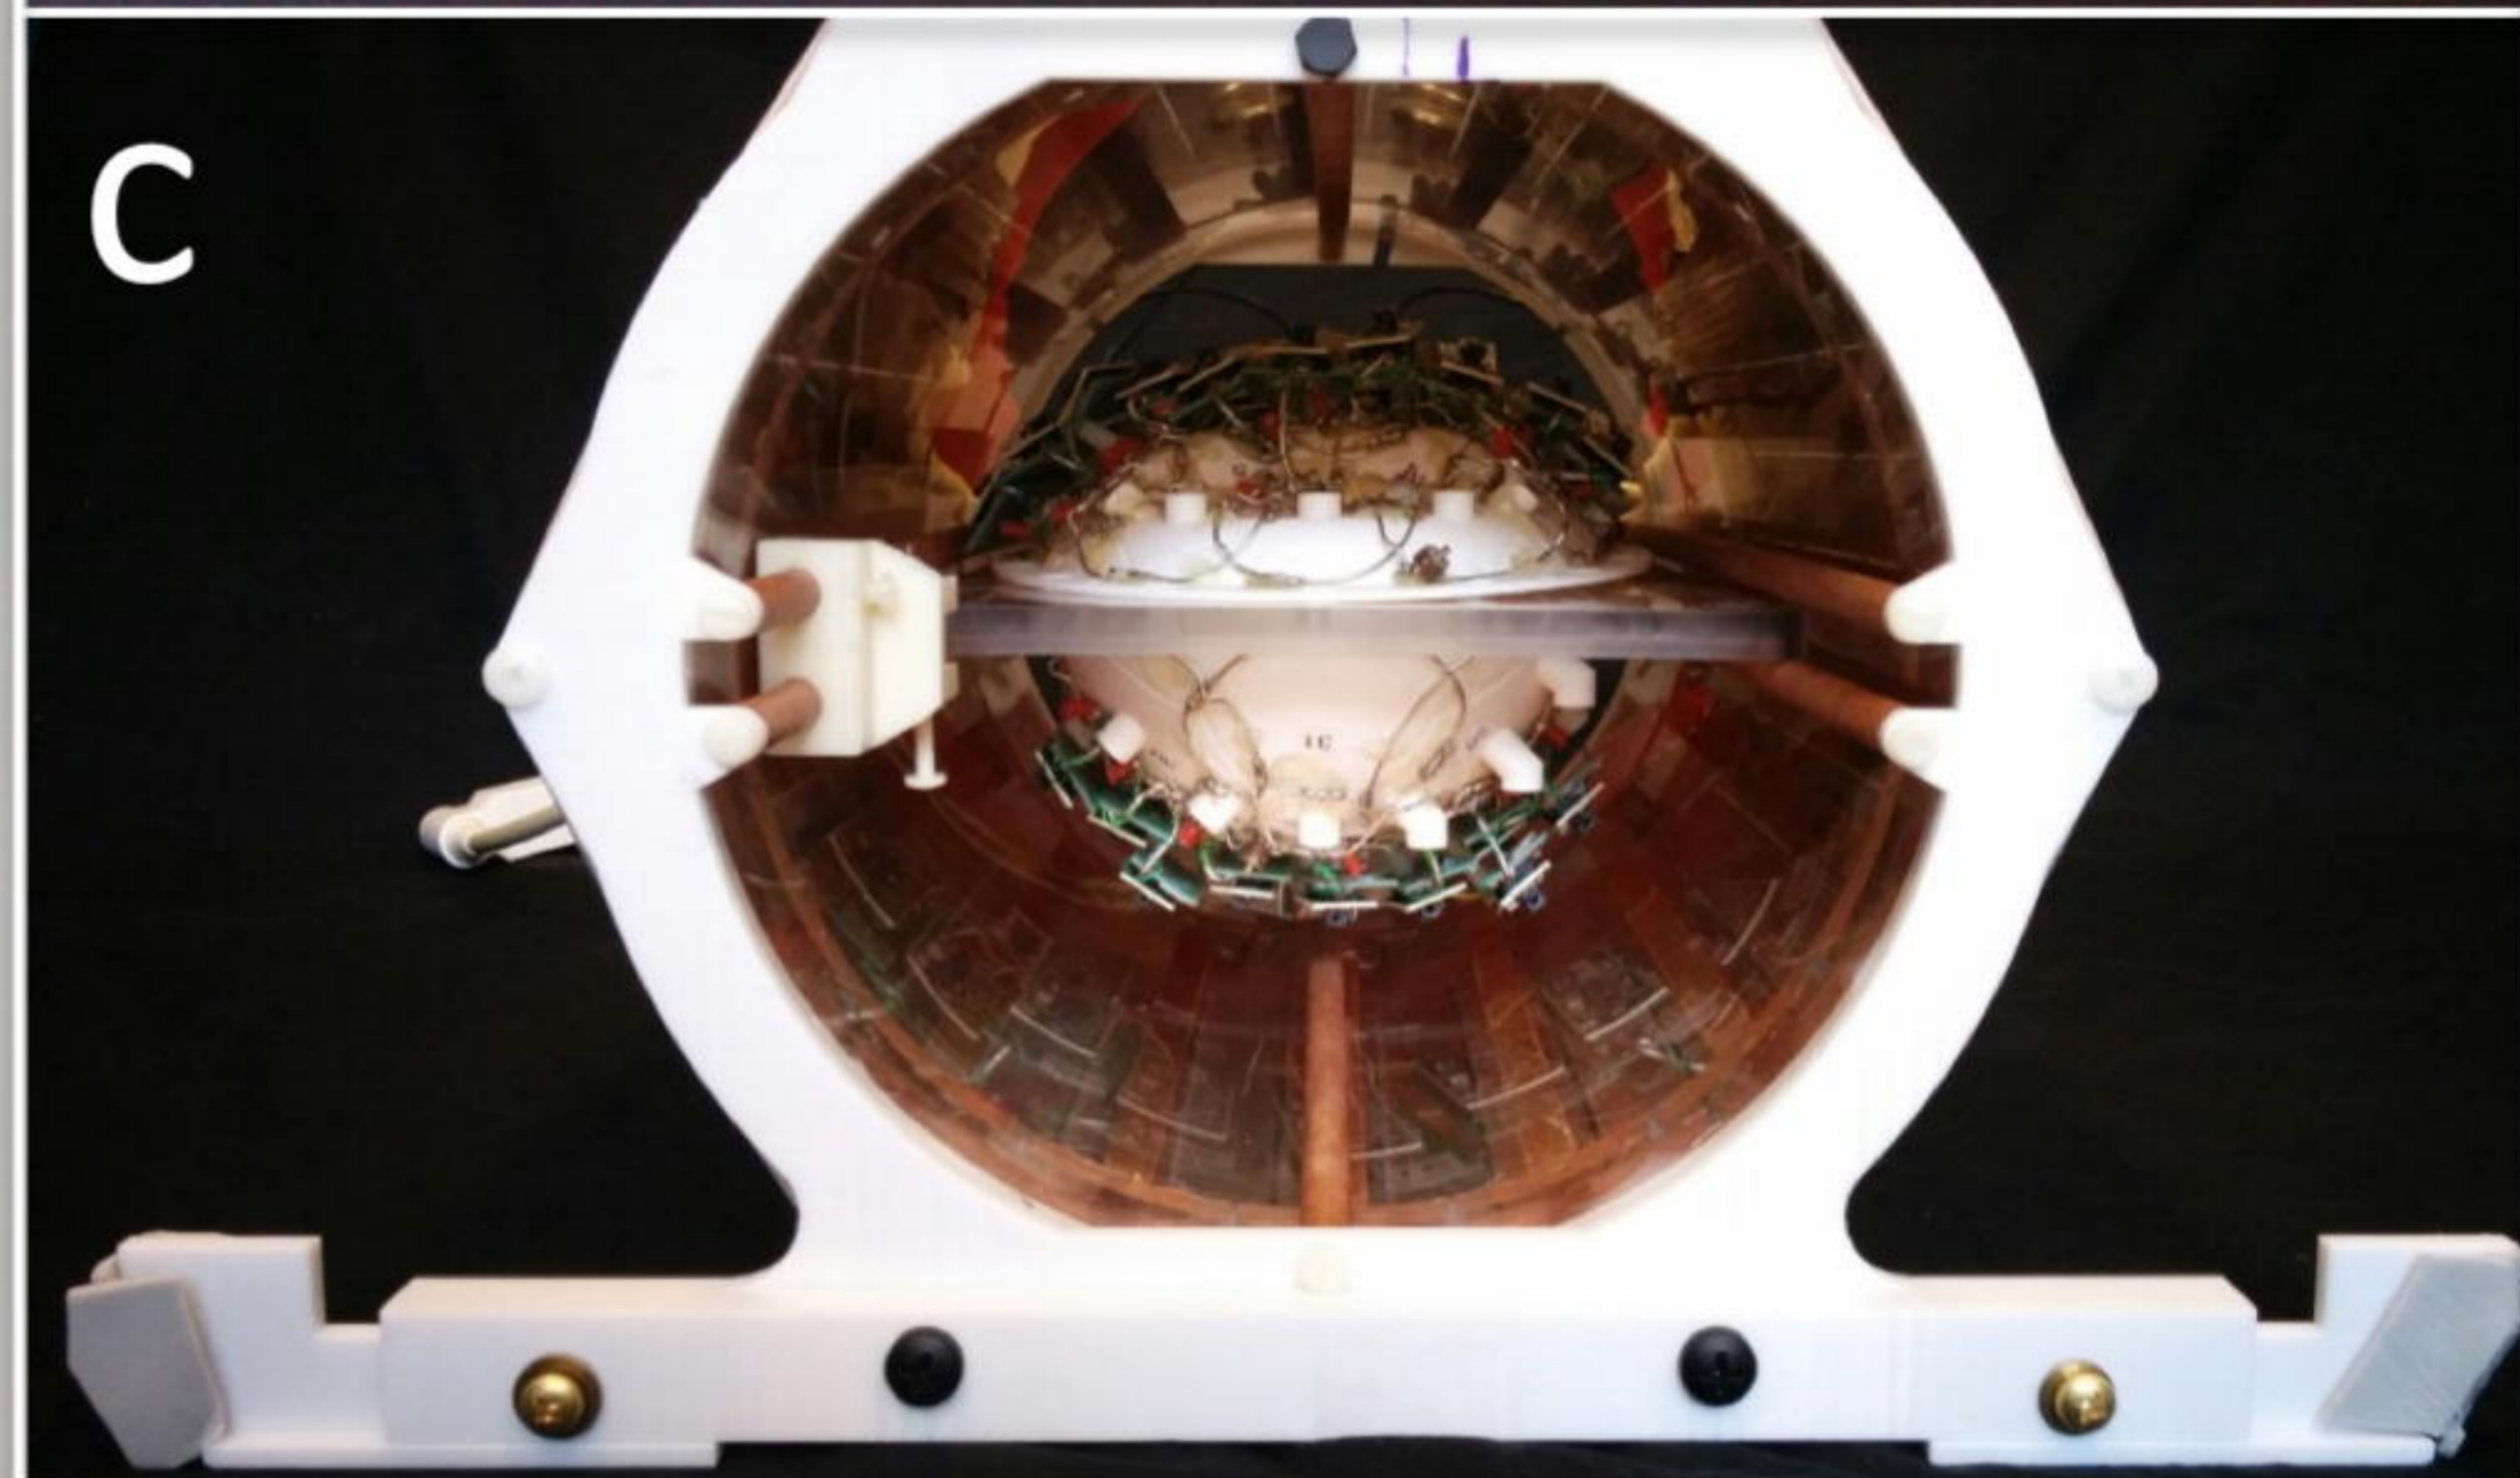**d**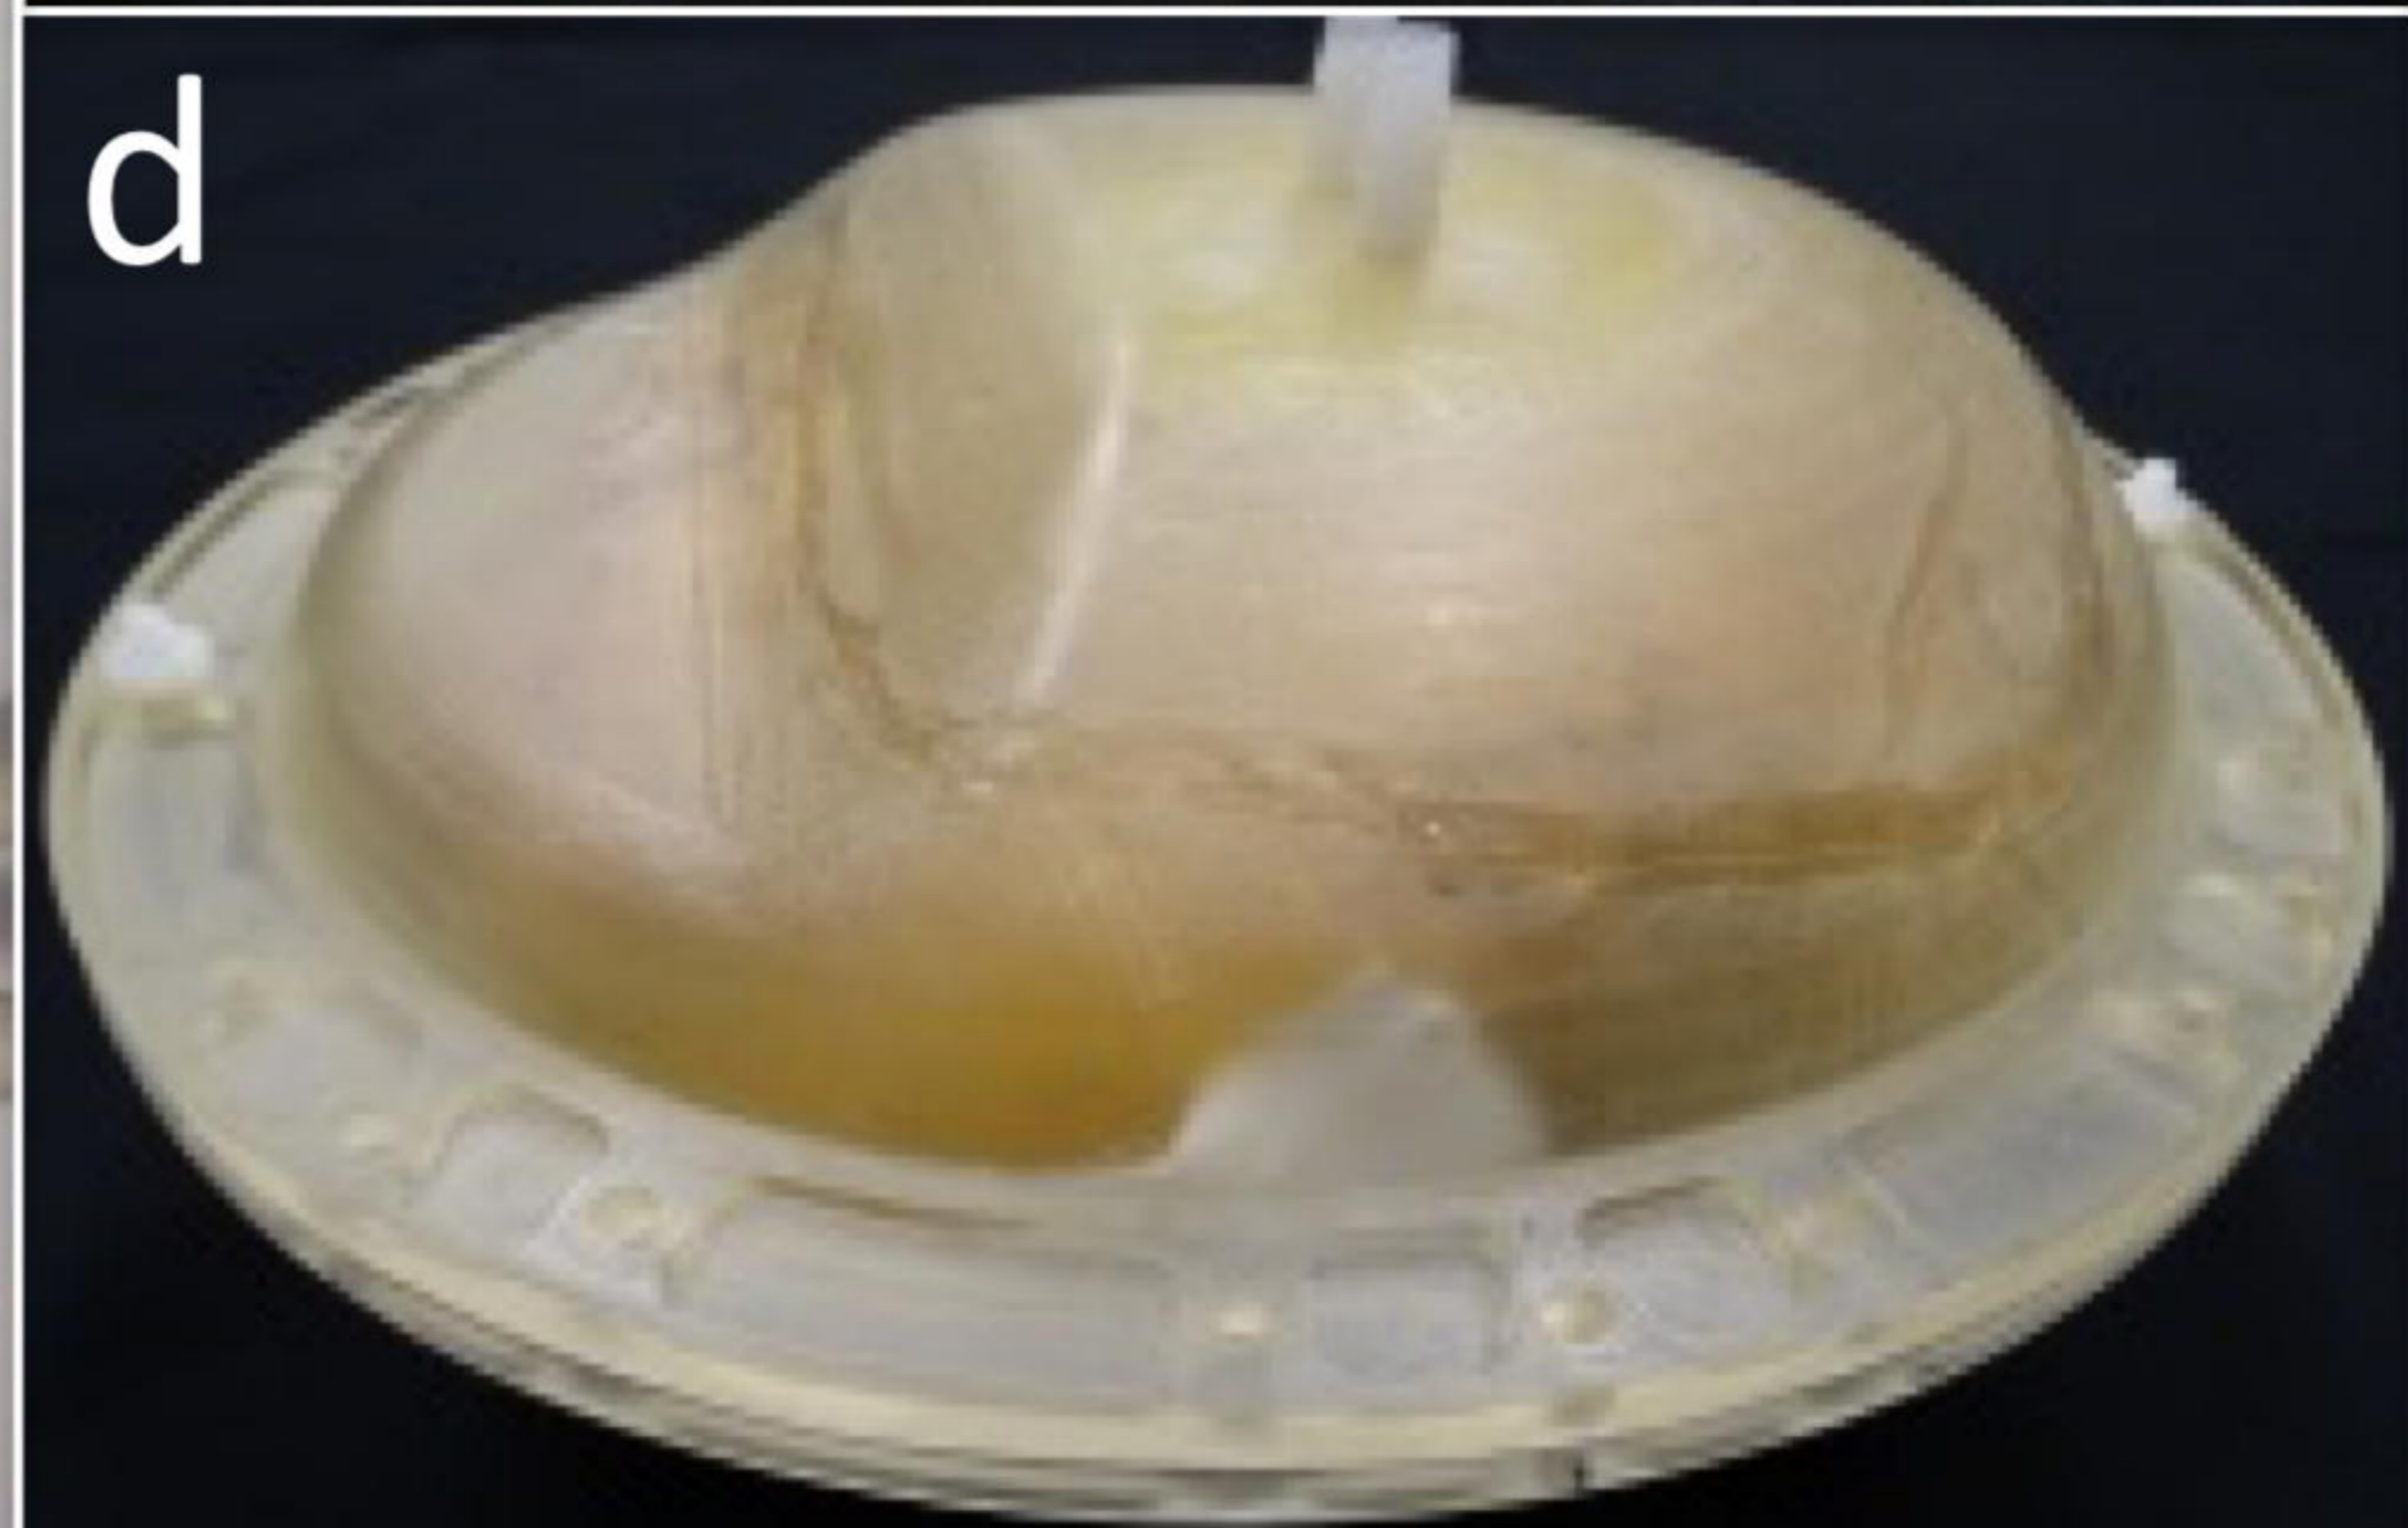



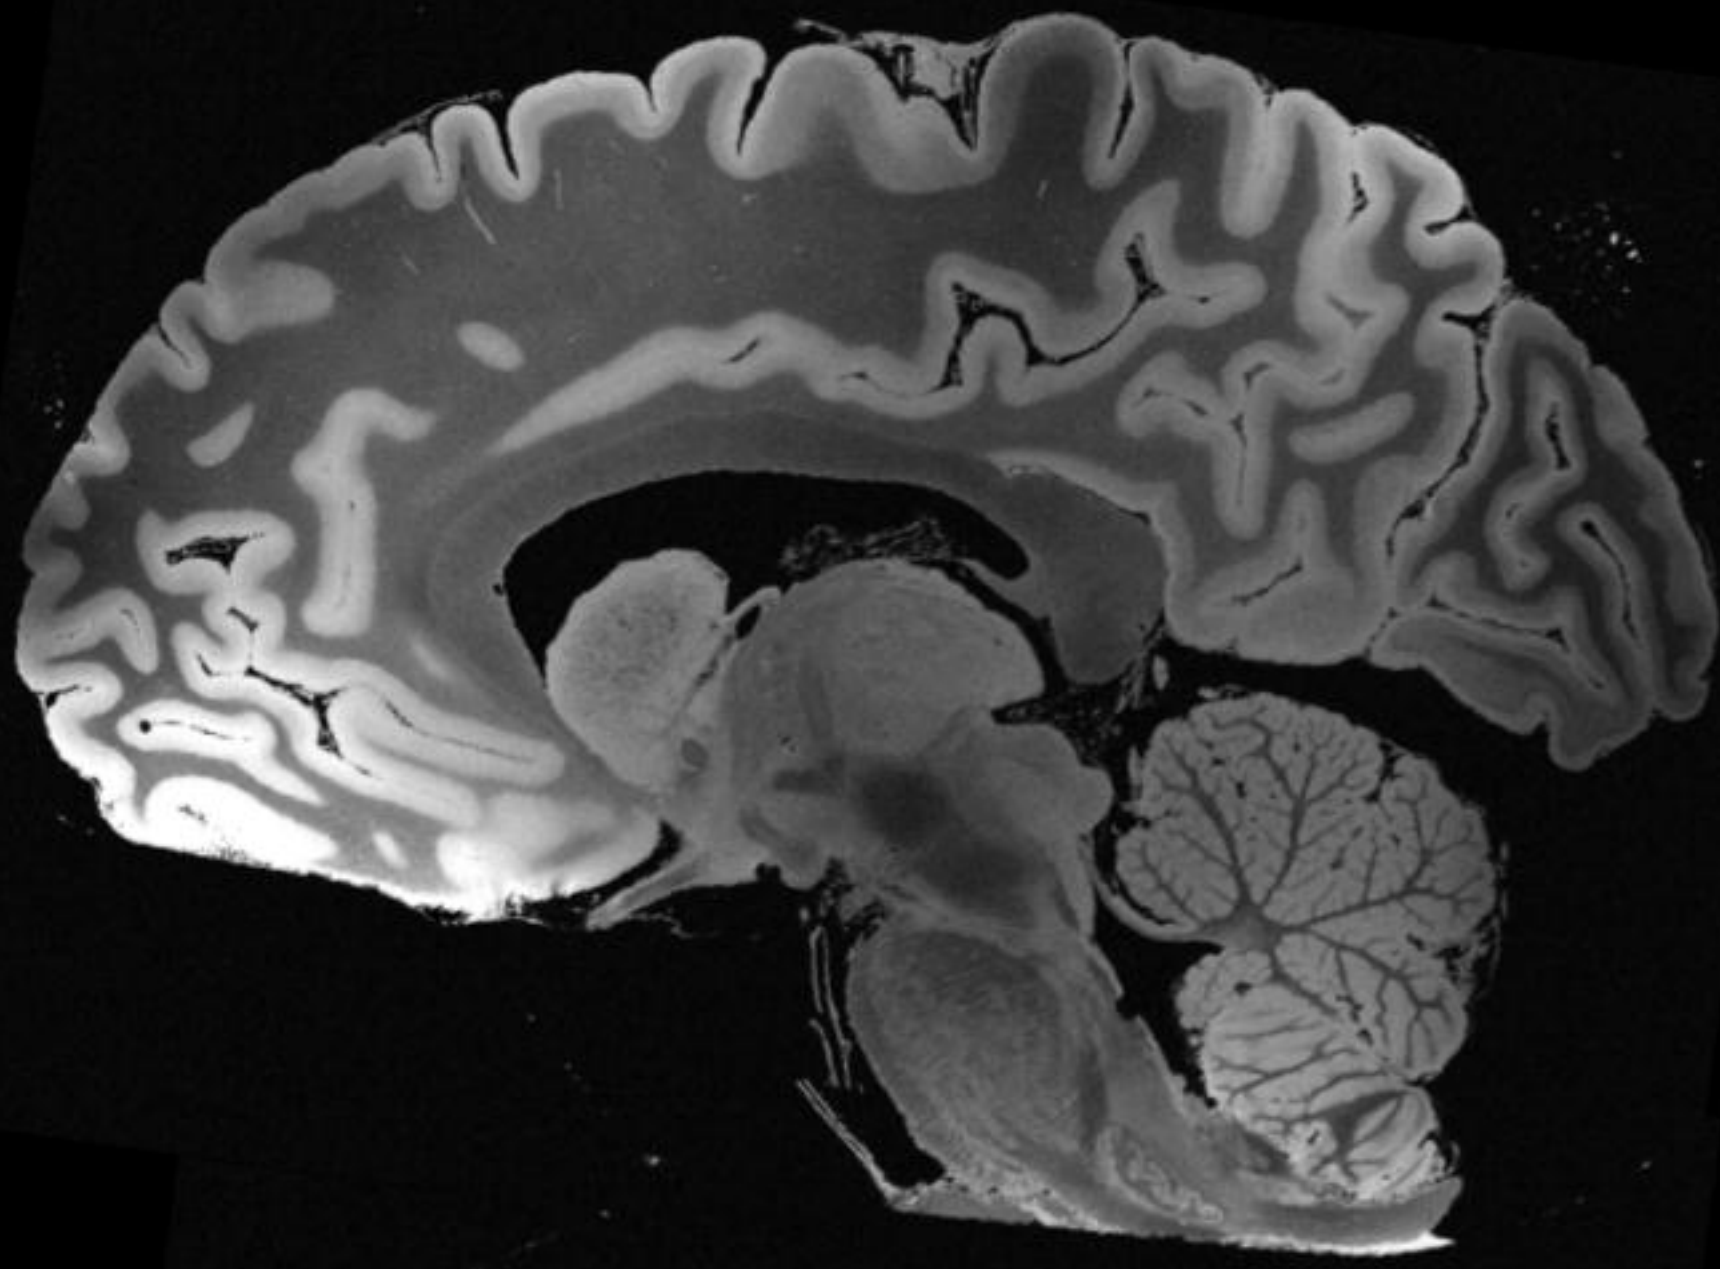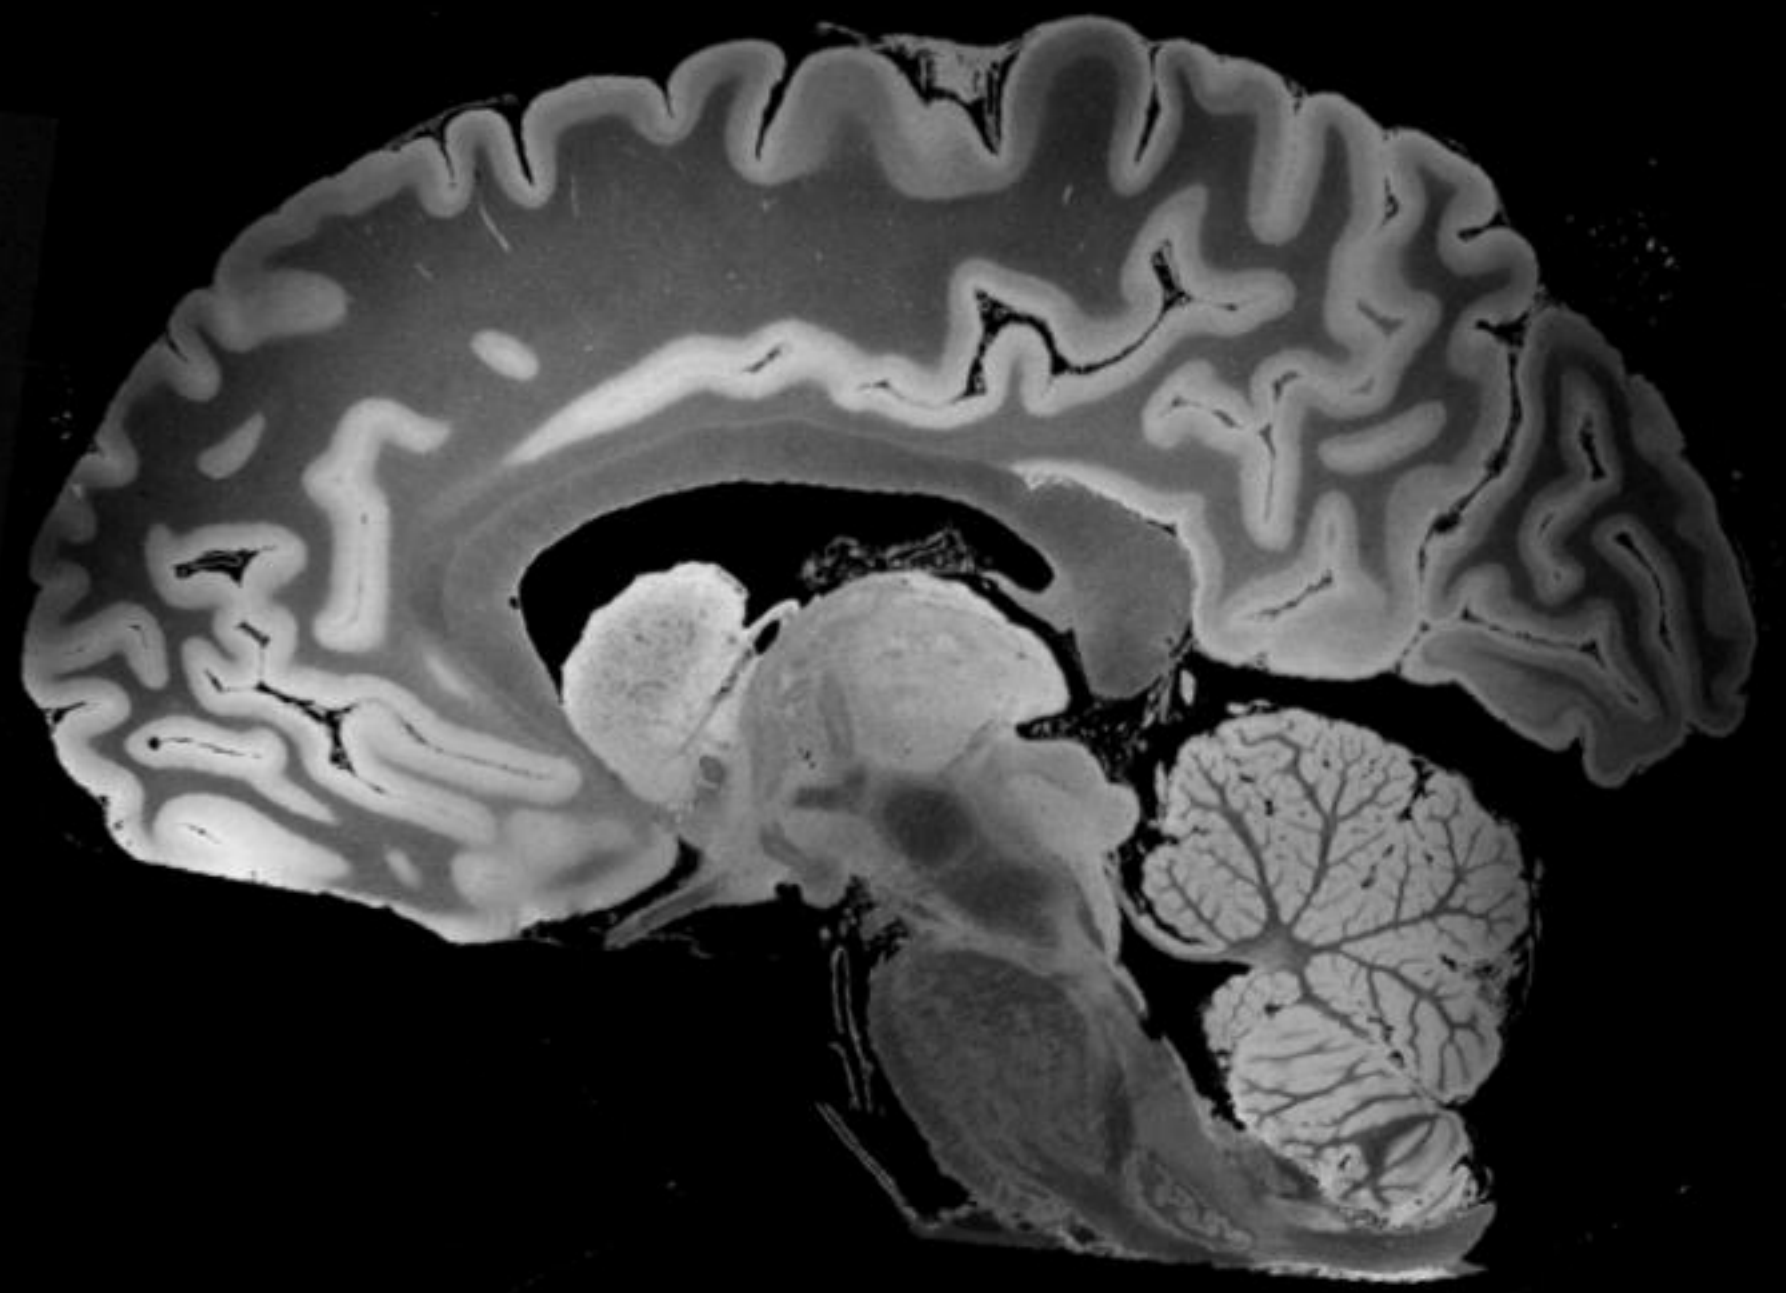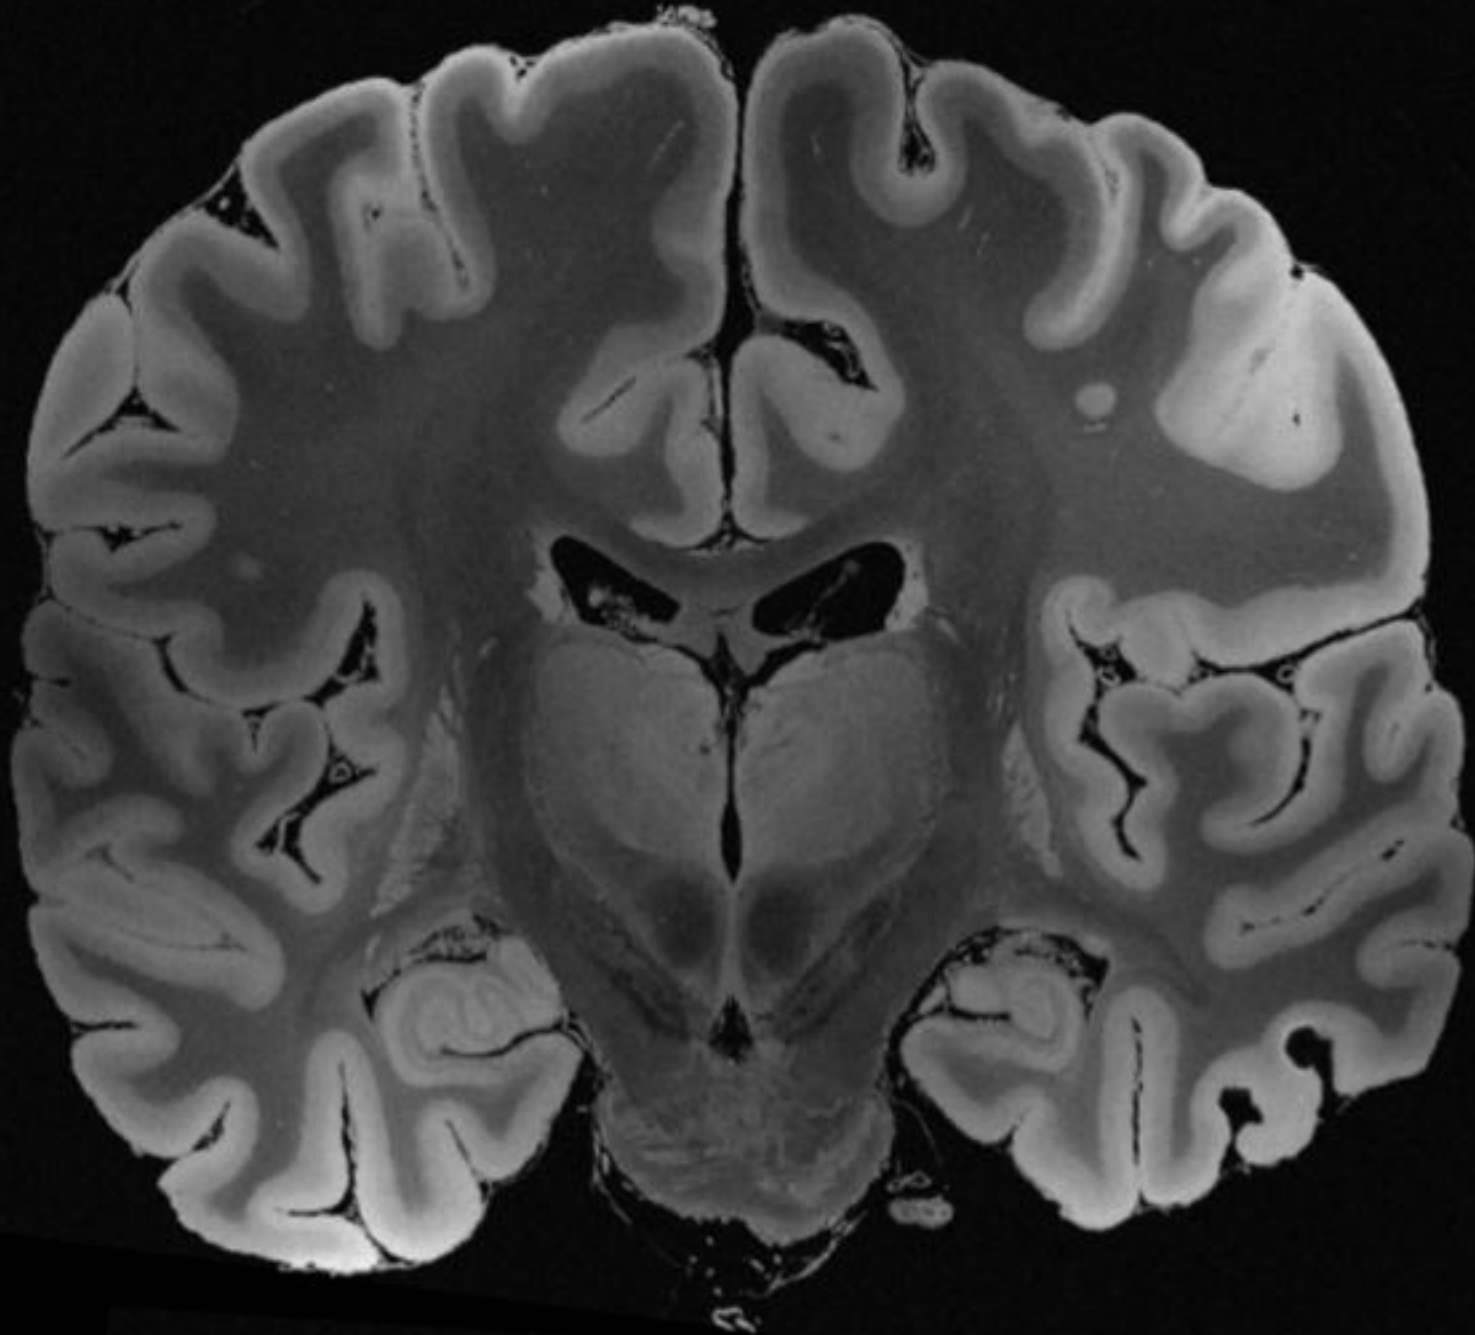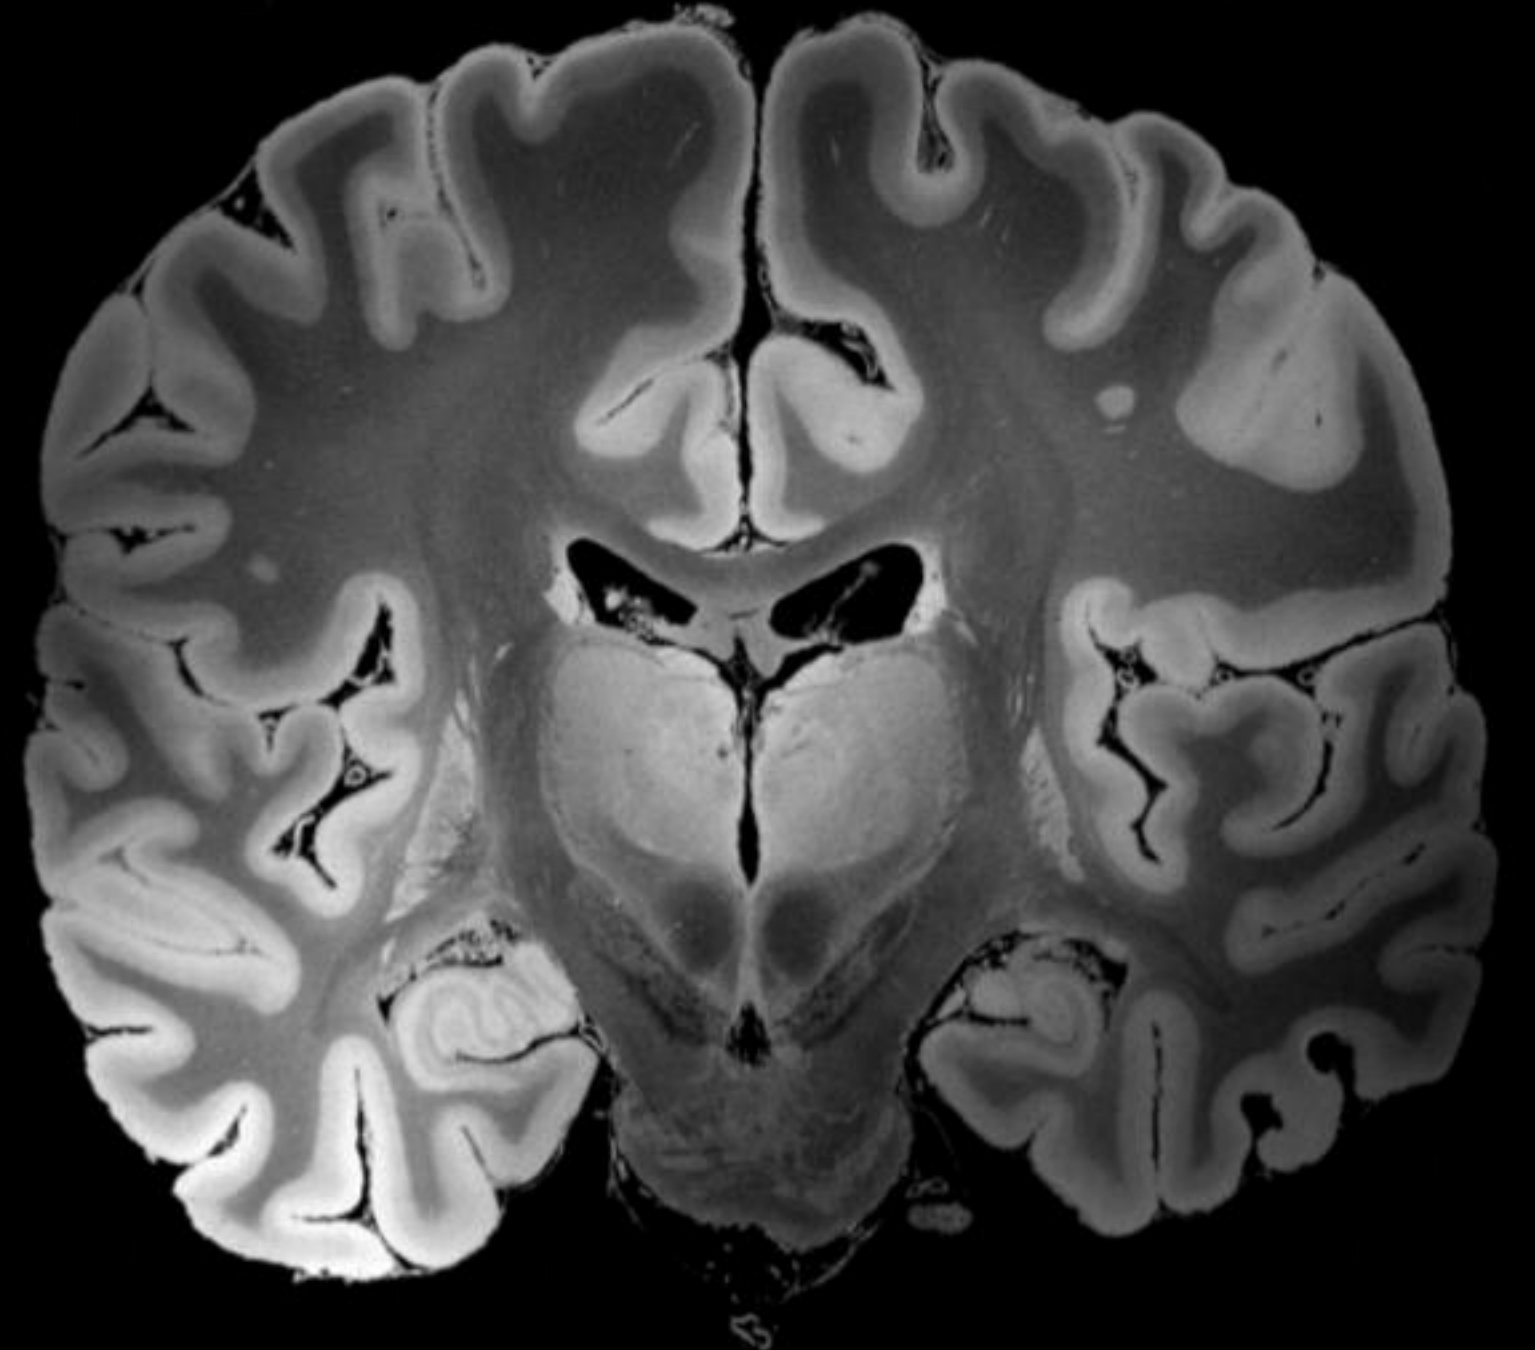

<https://doi.org/10.1101/649822> was posted May 31, 2019. The copyright holder for this preprint (which was not certified by peer review) is the author/funder, who has granted bioRxiv a license to display the preprint in perpetuity. It is made available under aCC-BY 4.0 International license.

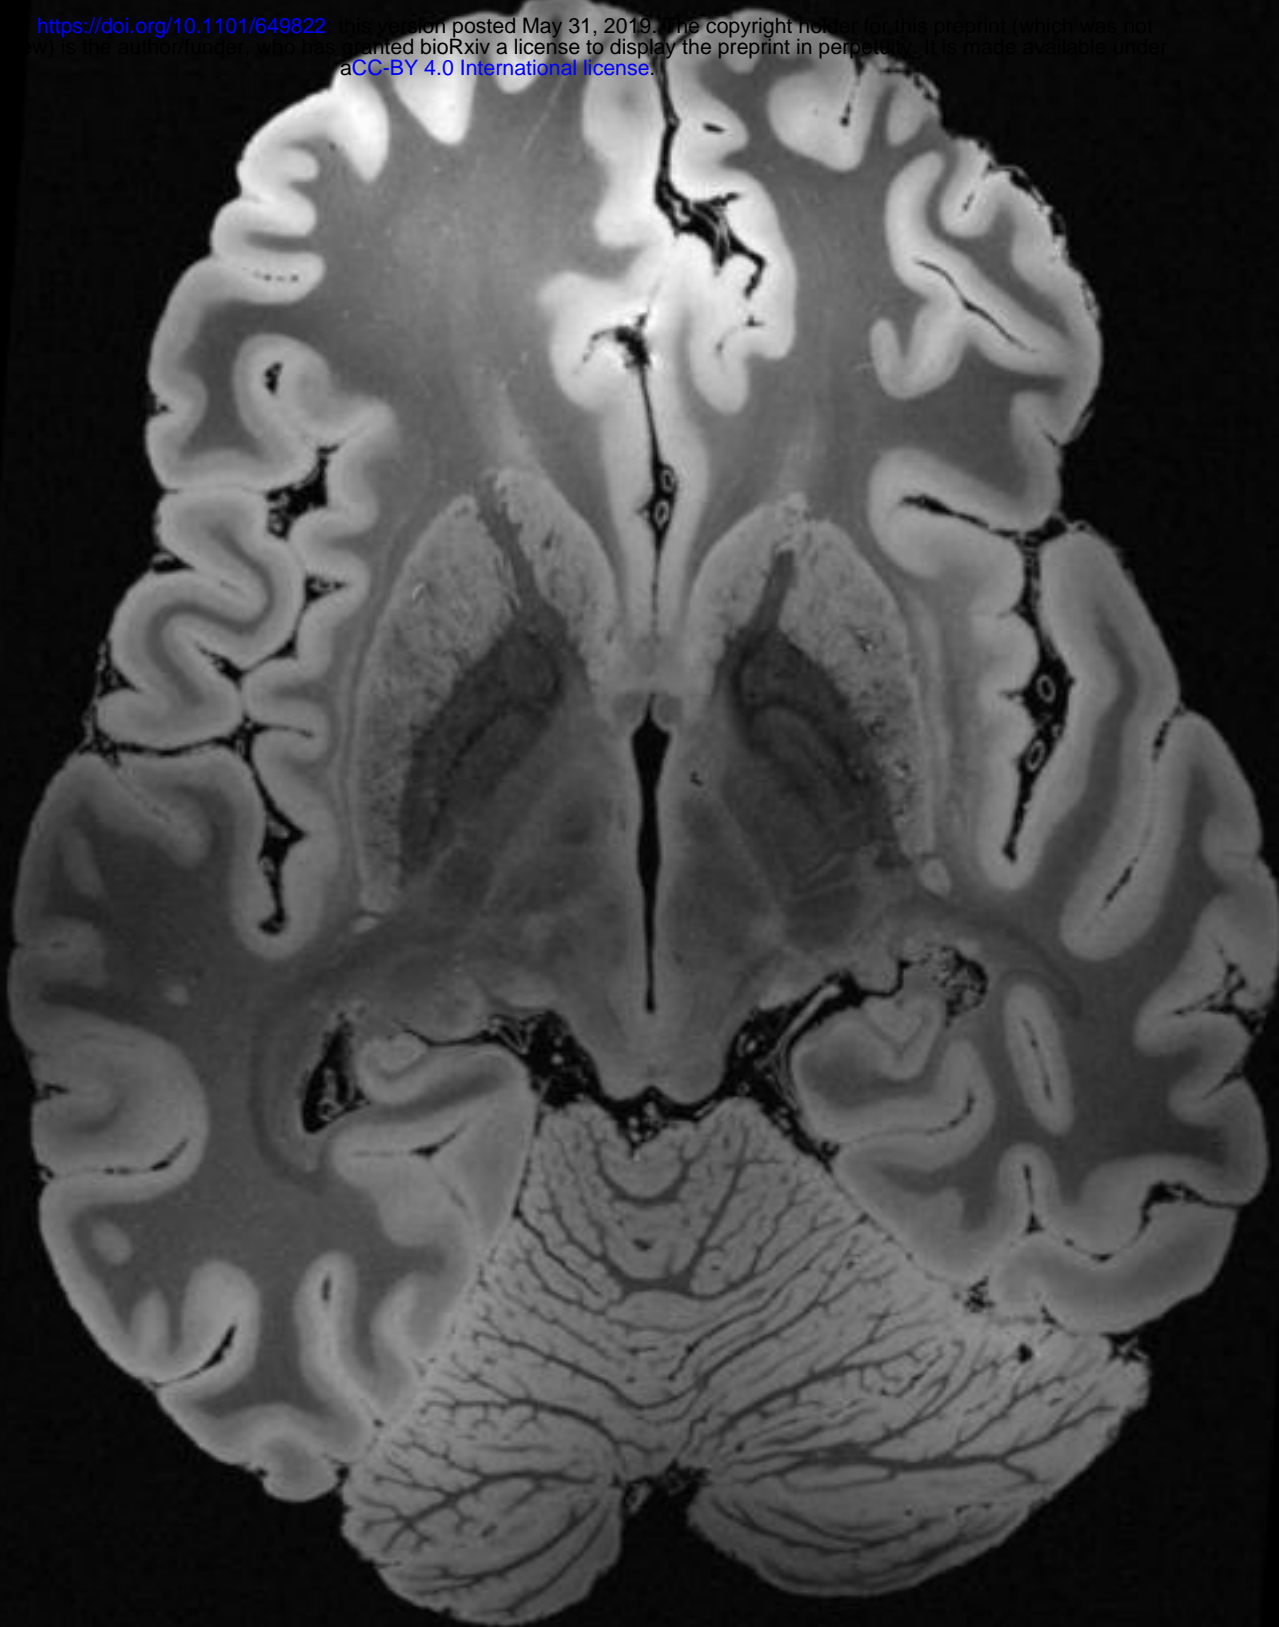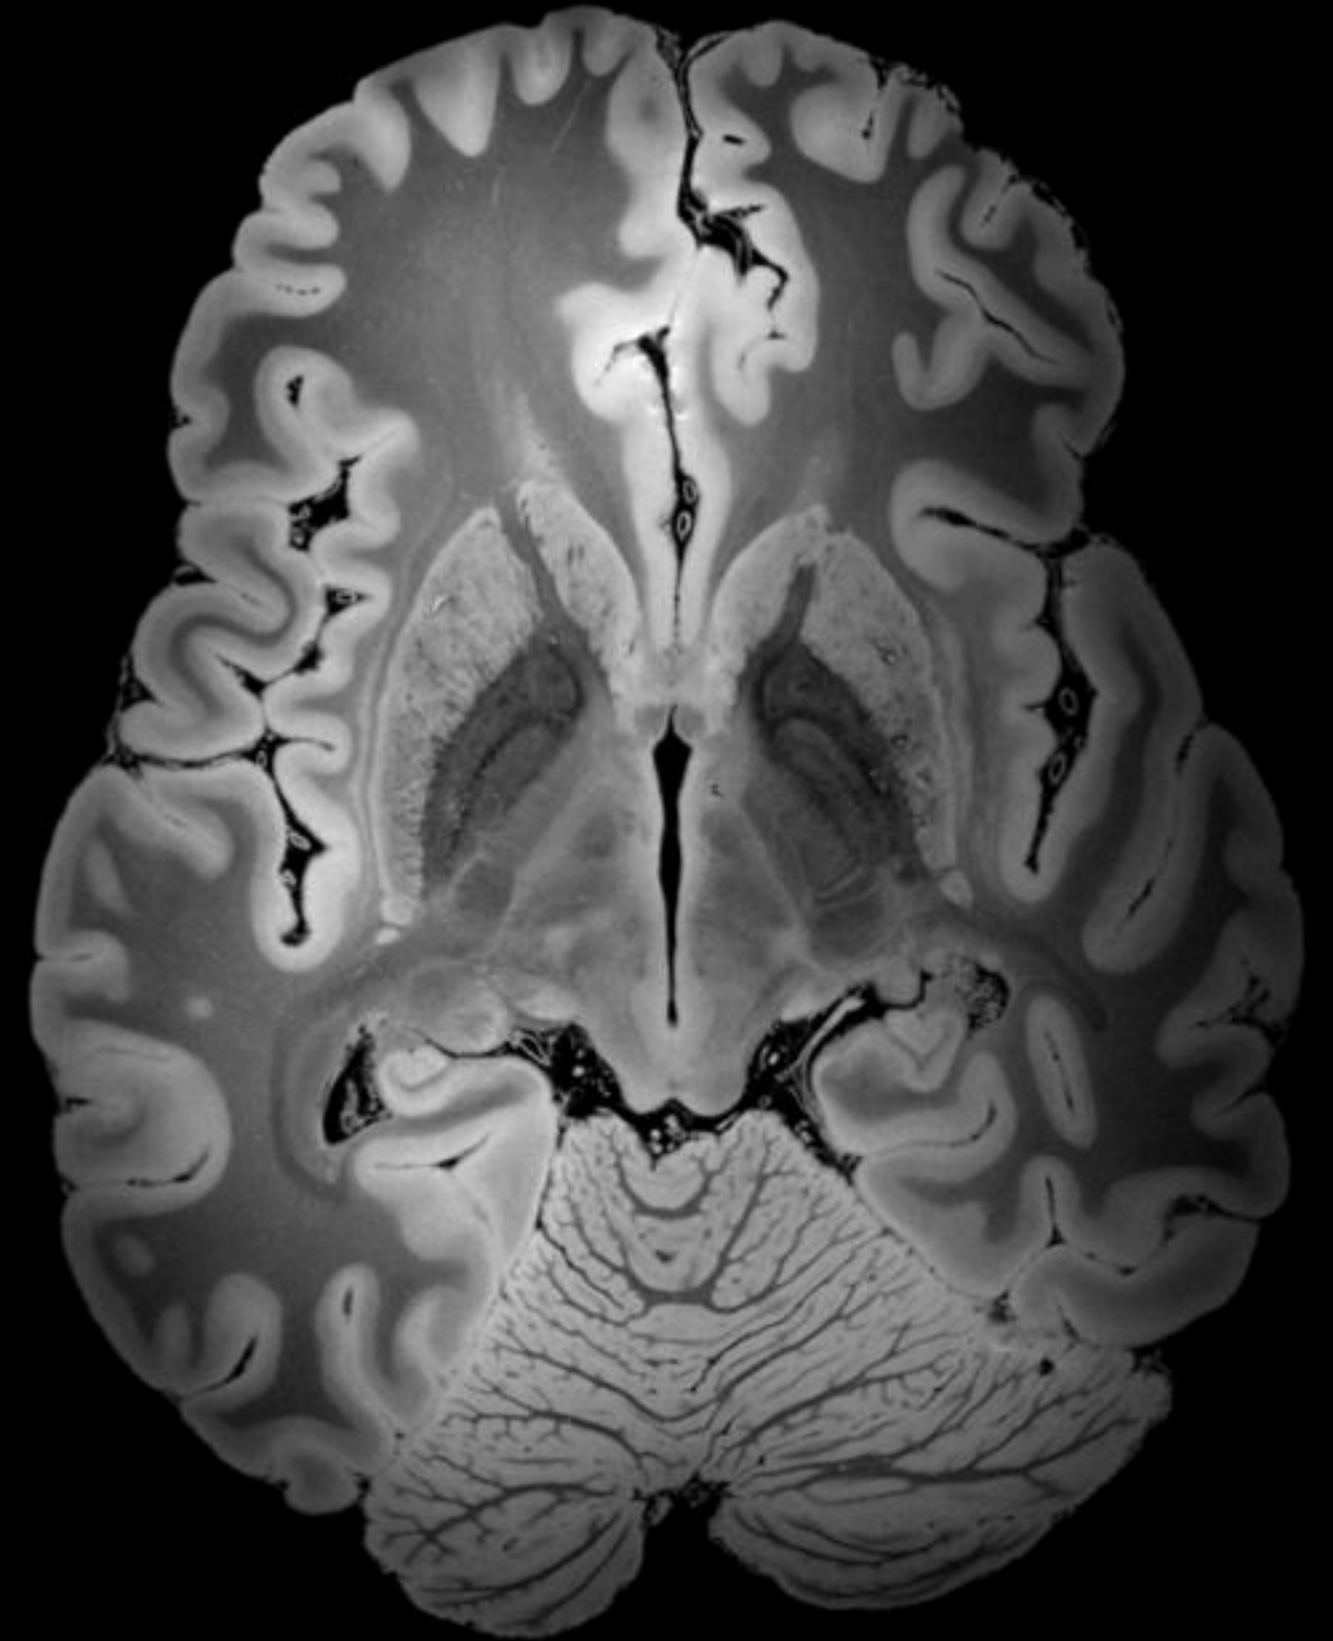

Acquired FA25°  
(~25 hours)

Synthesized FLASH25  
(~100 hours)



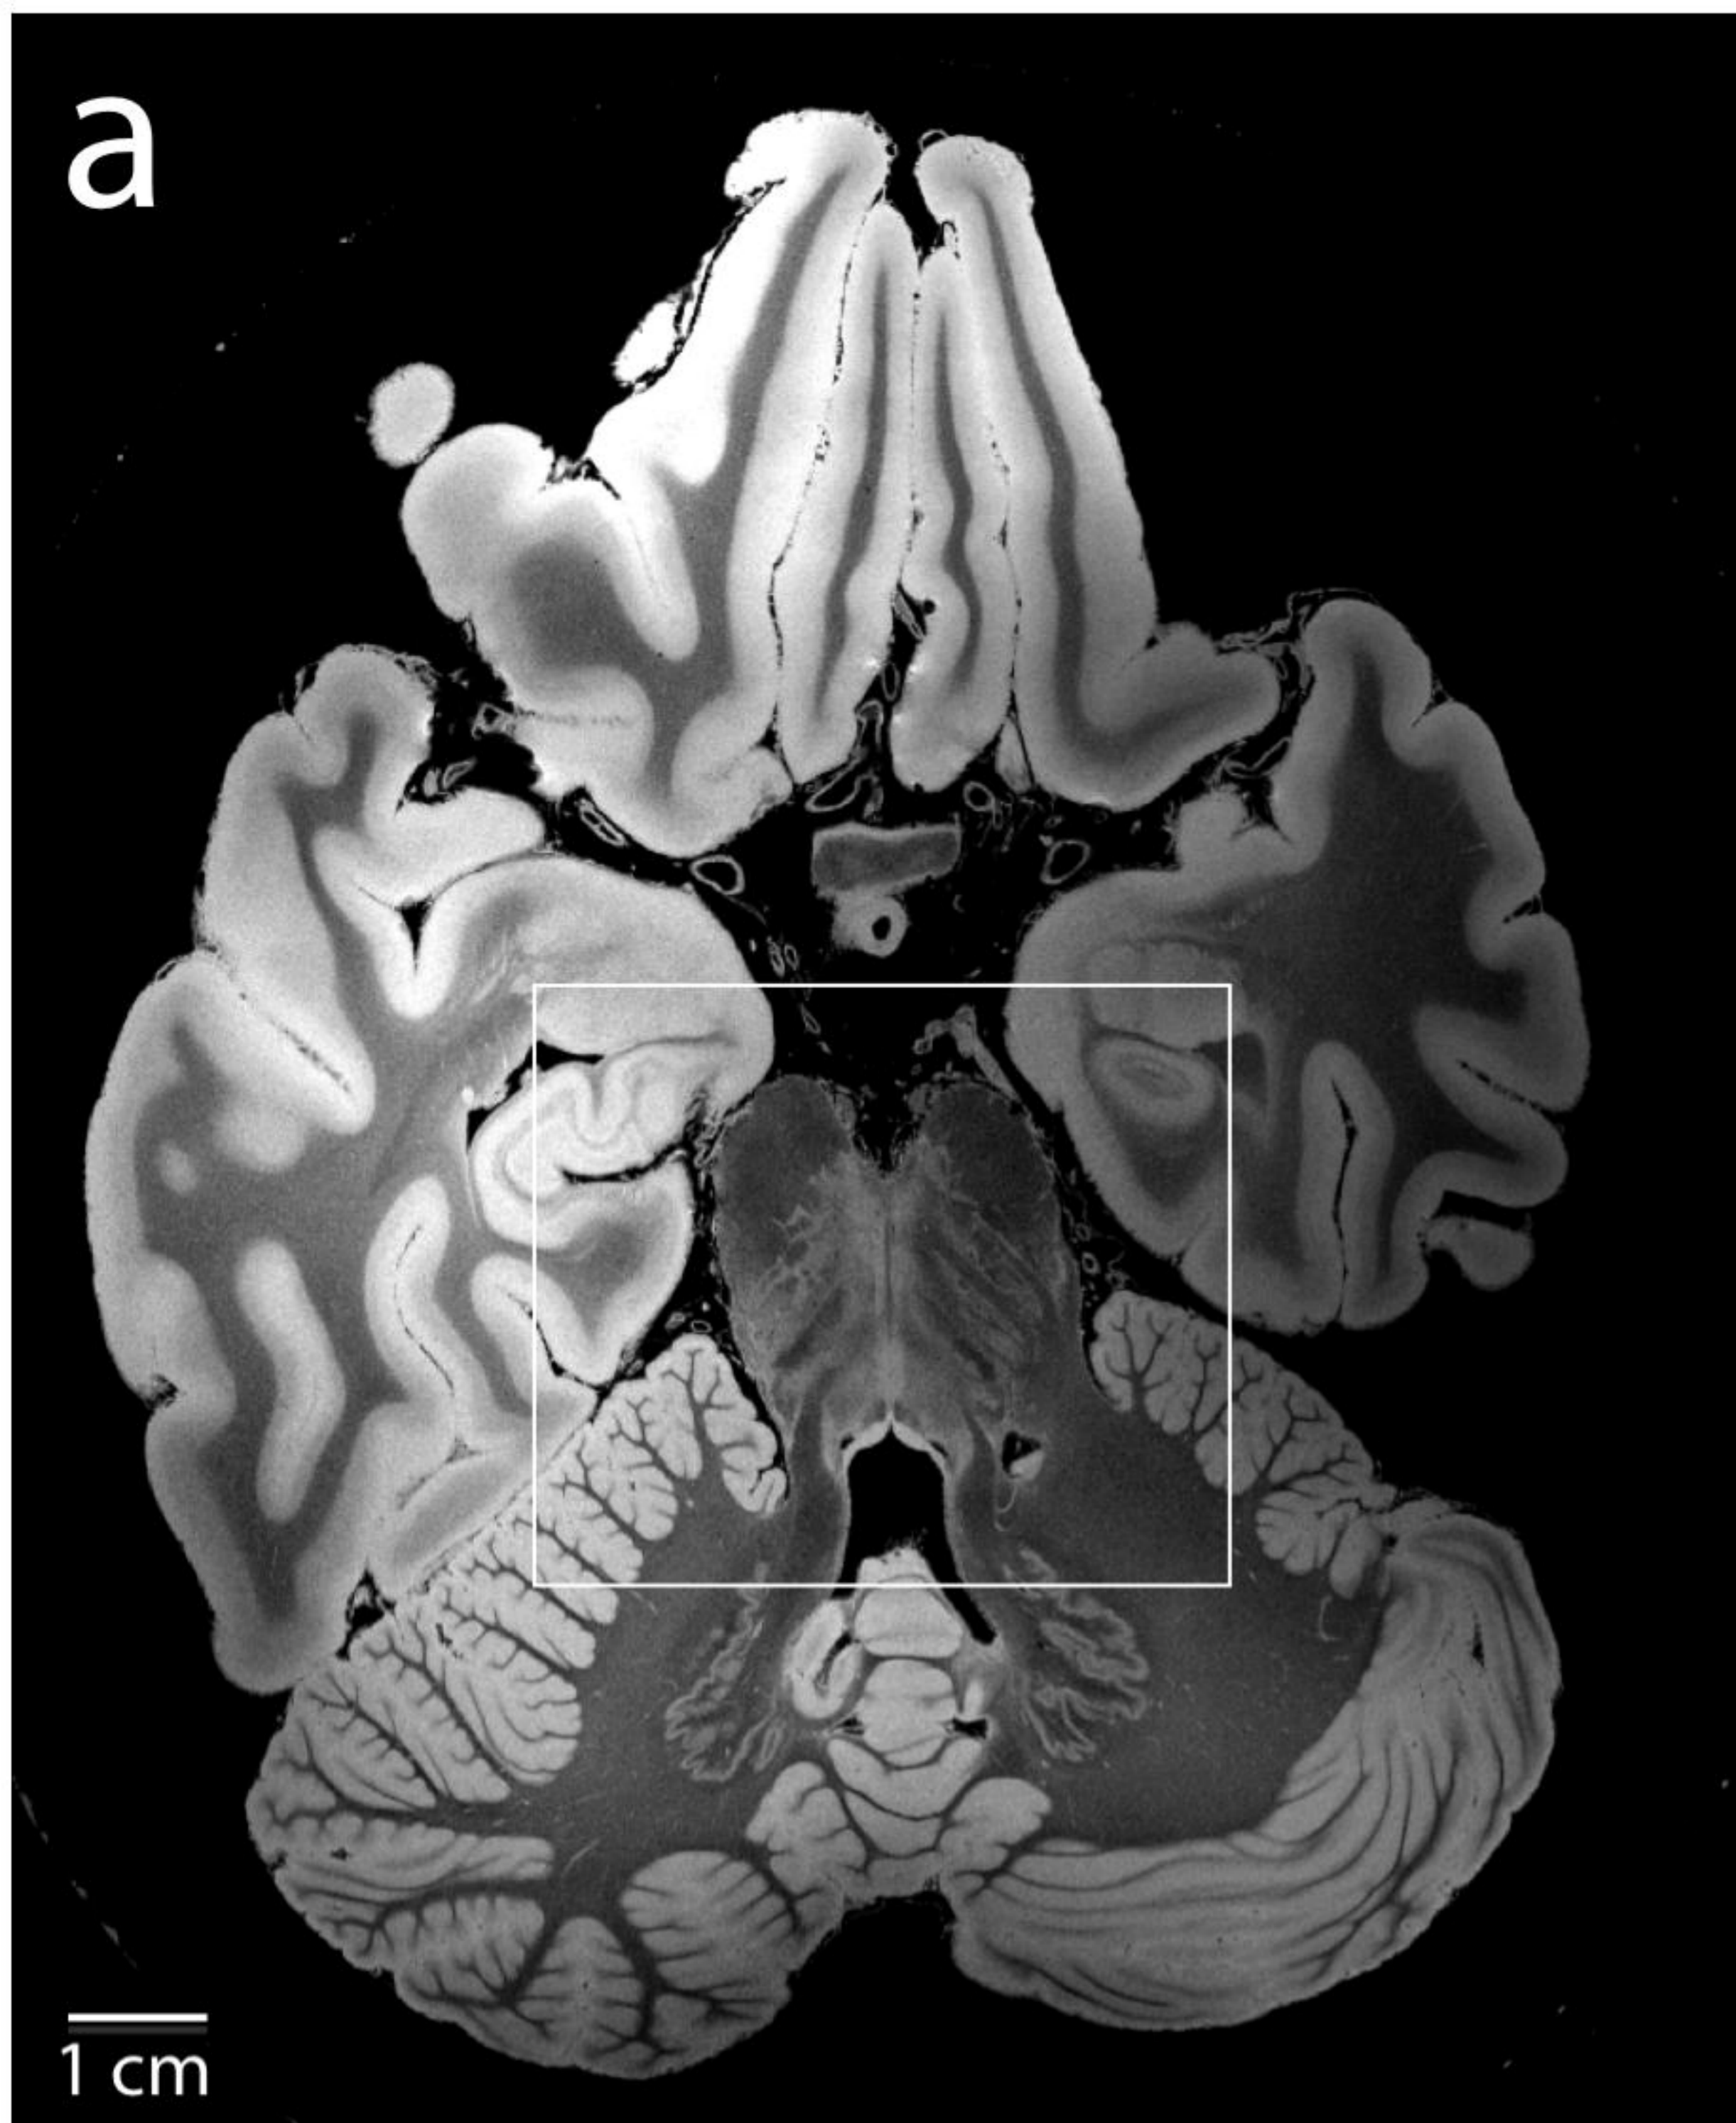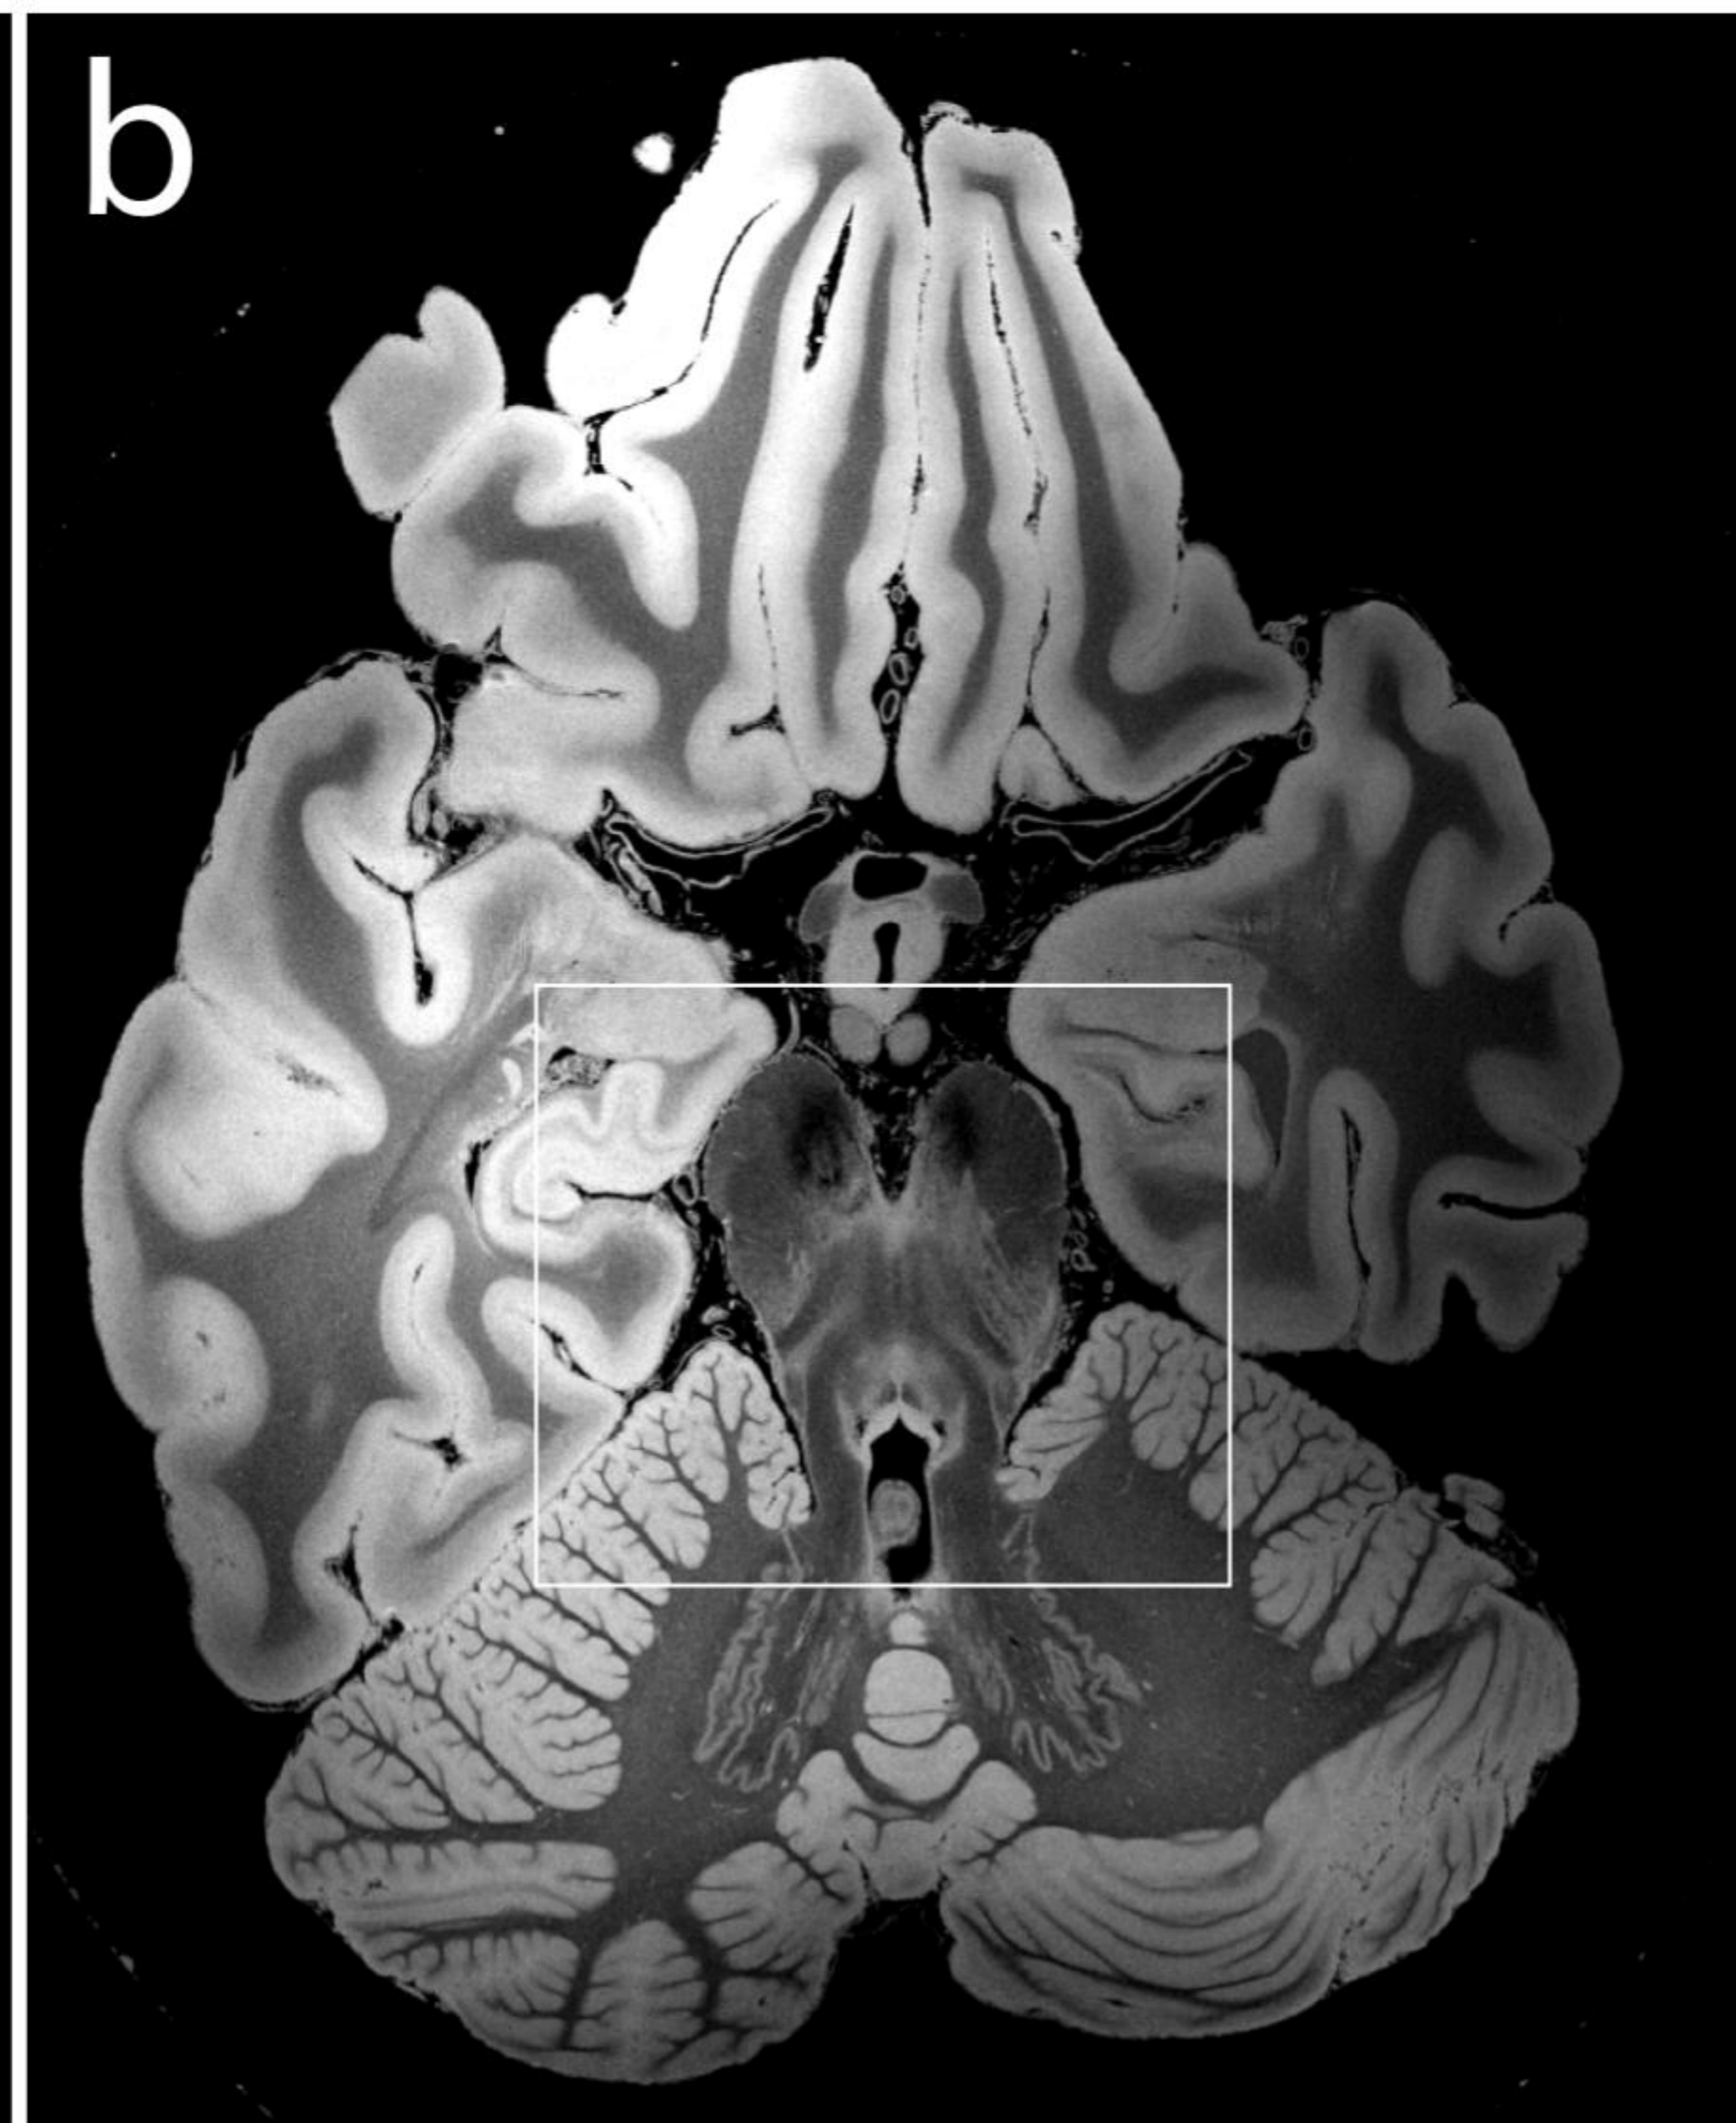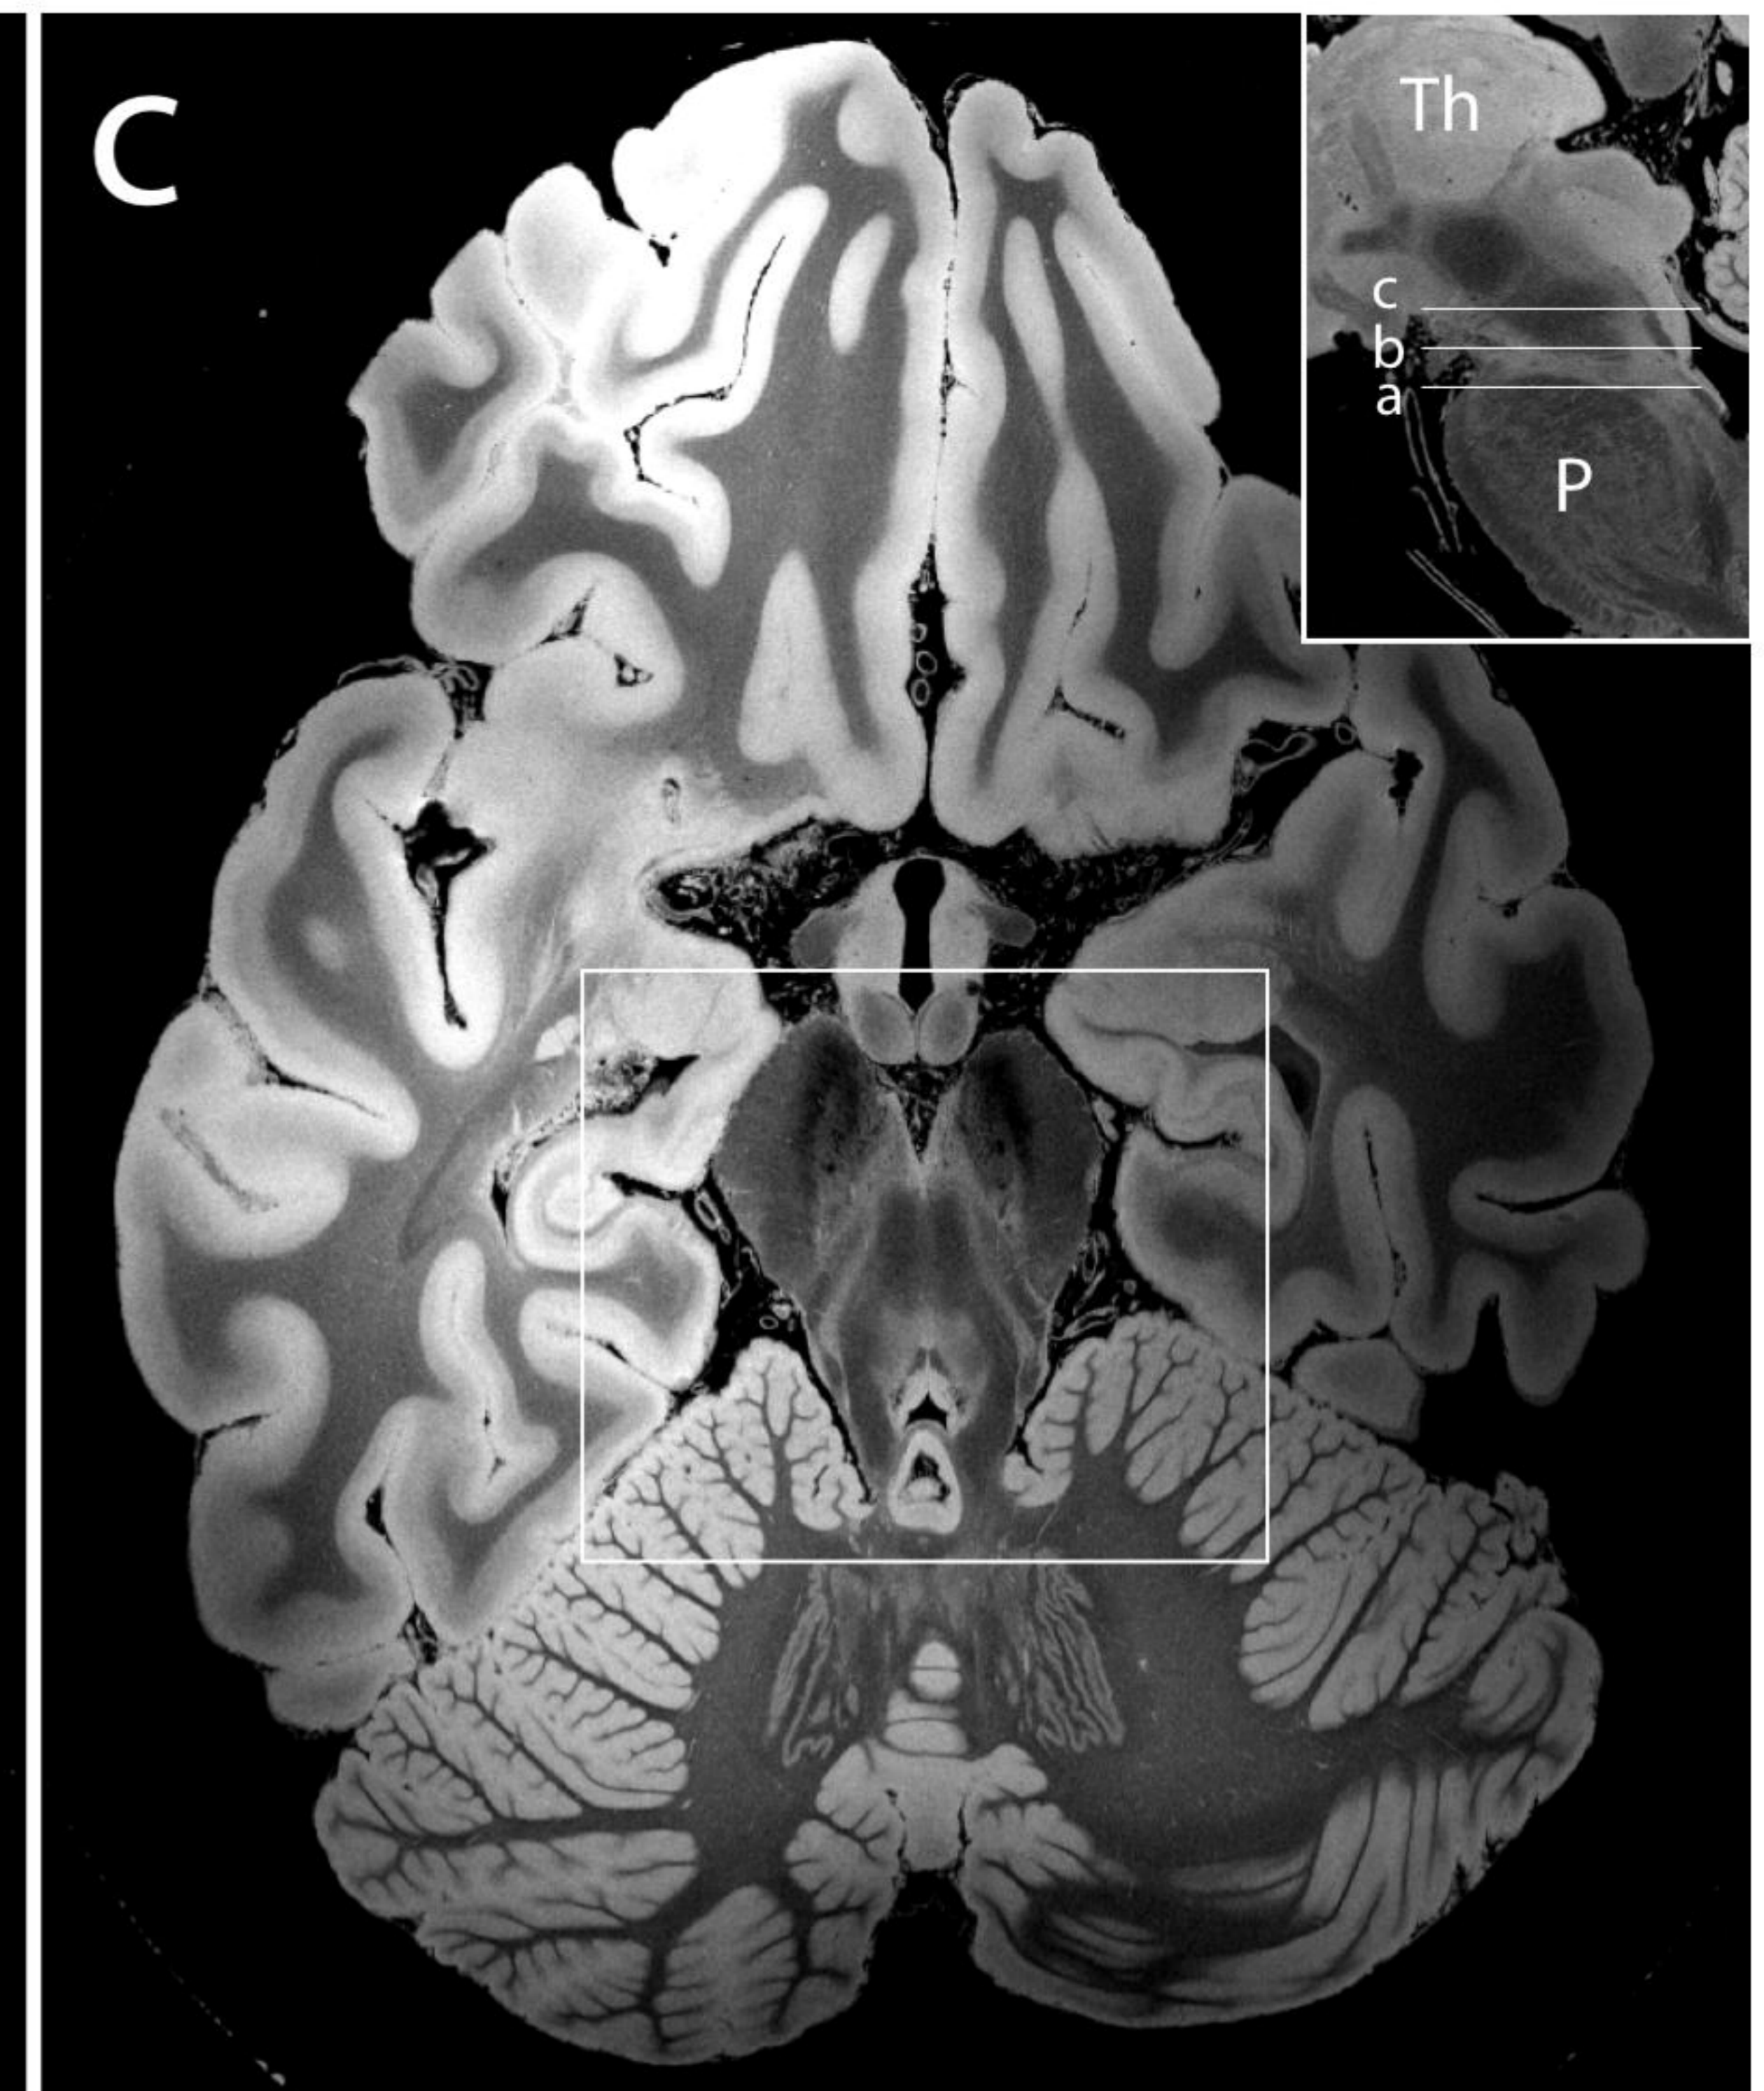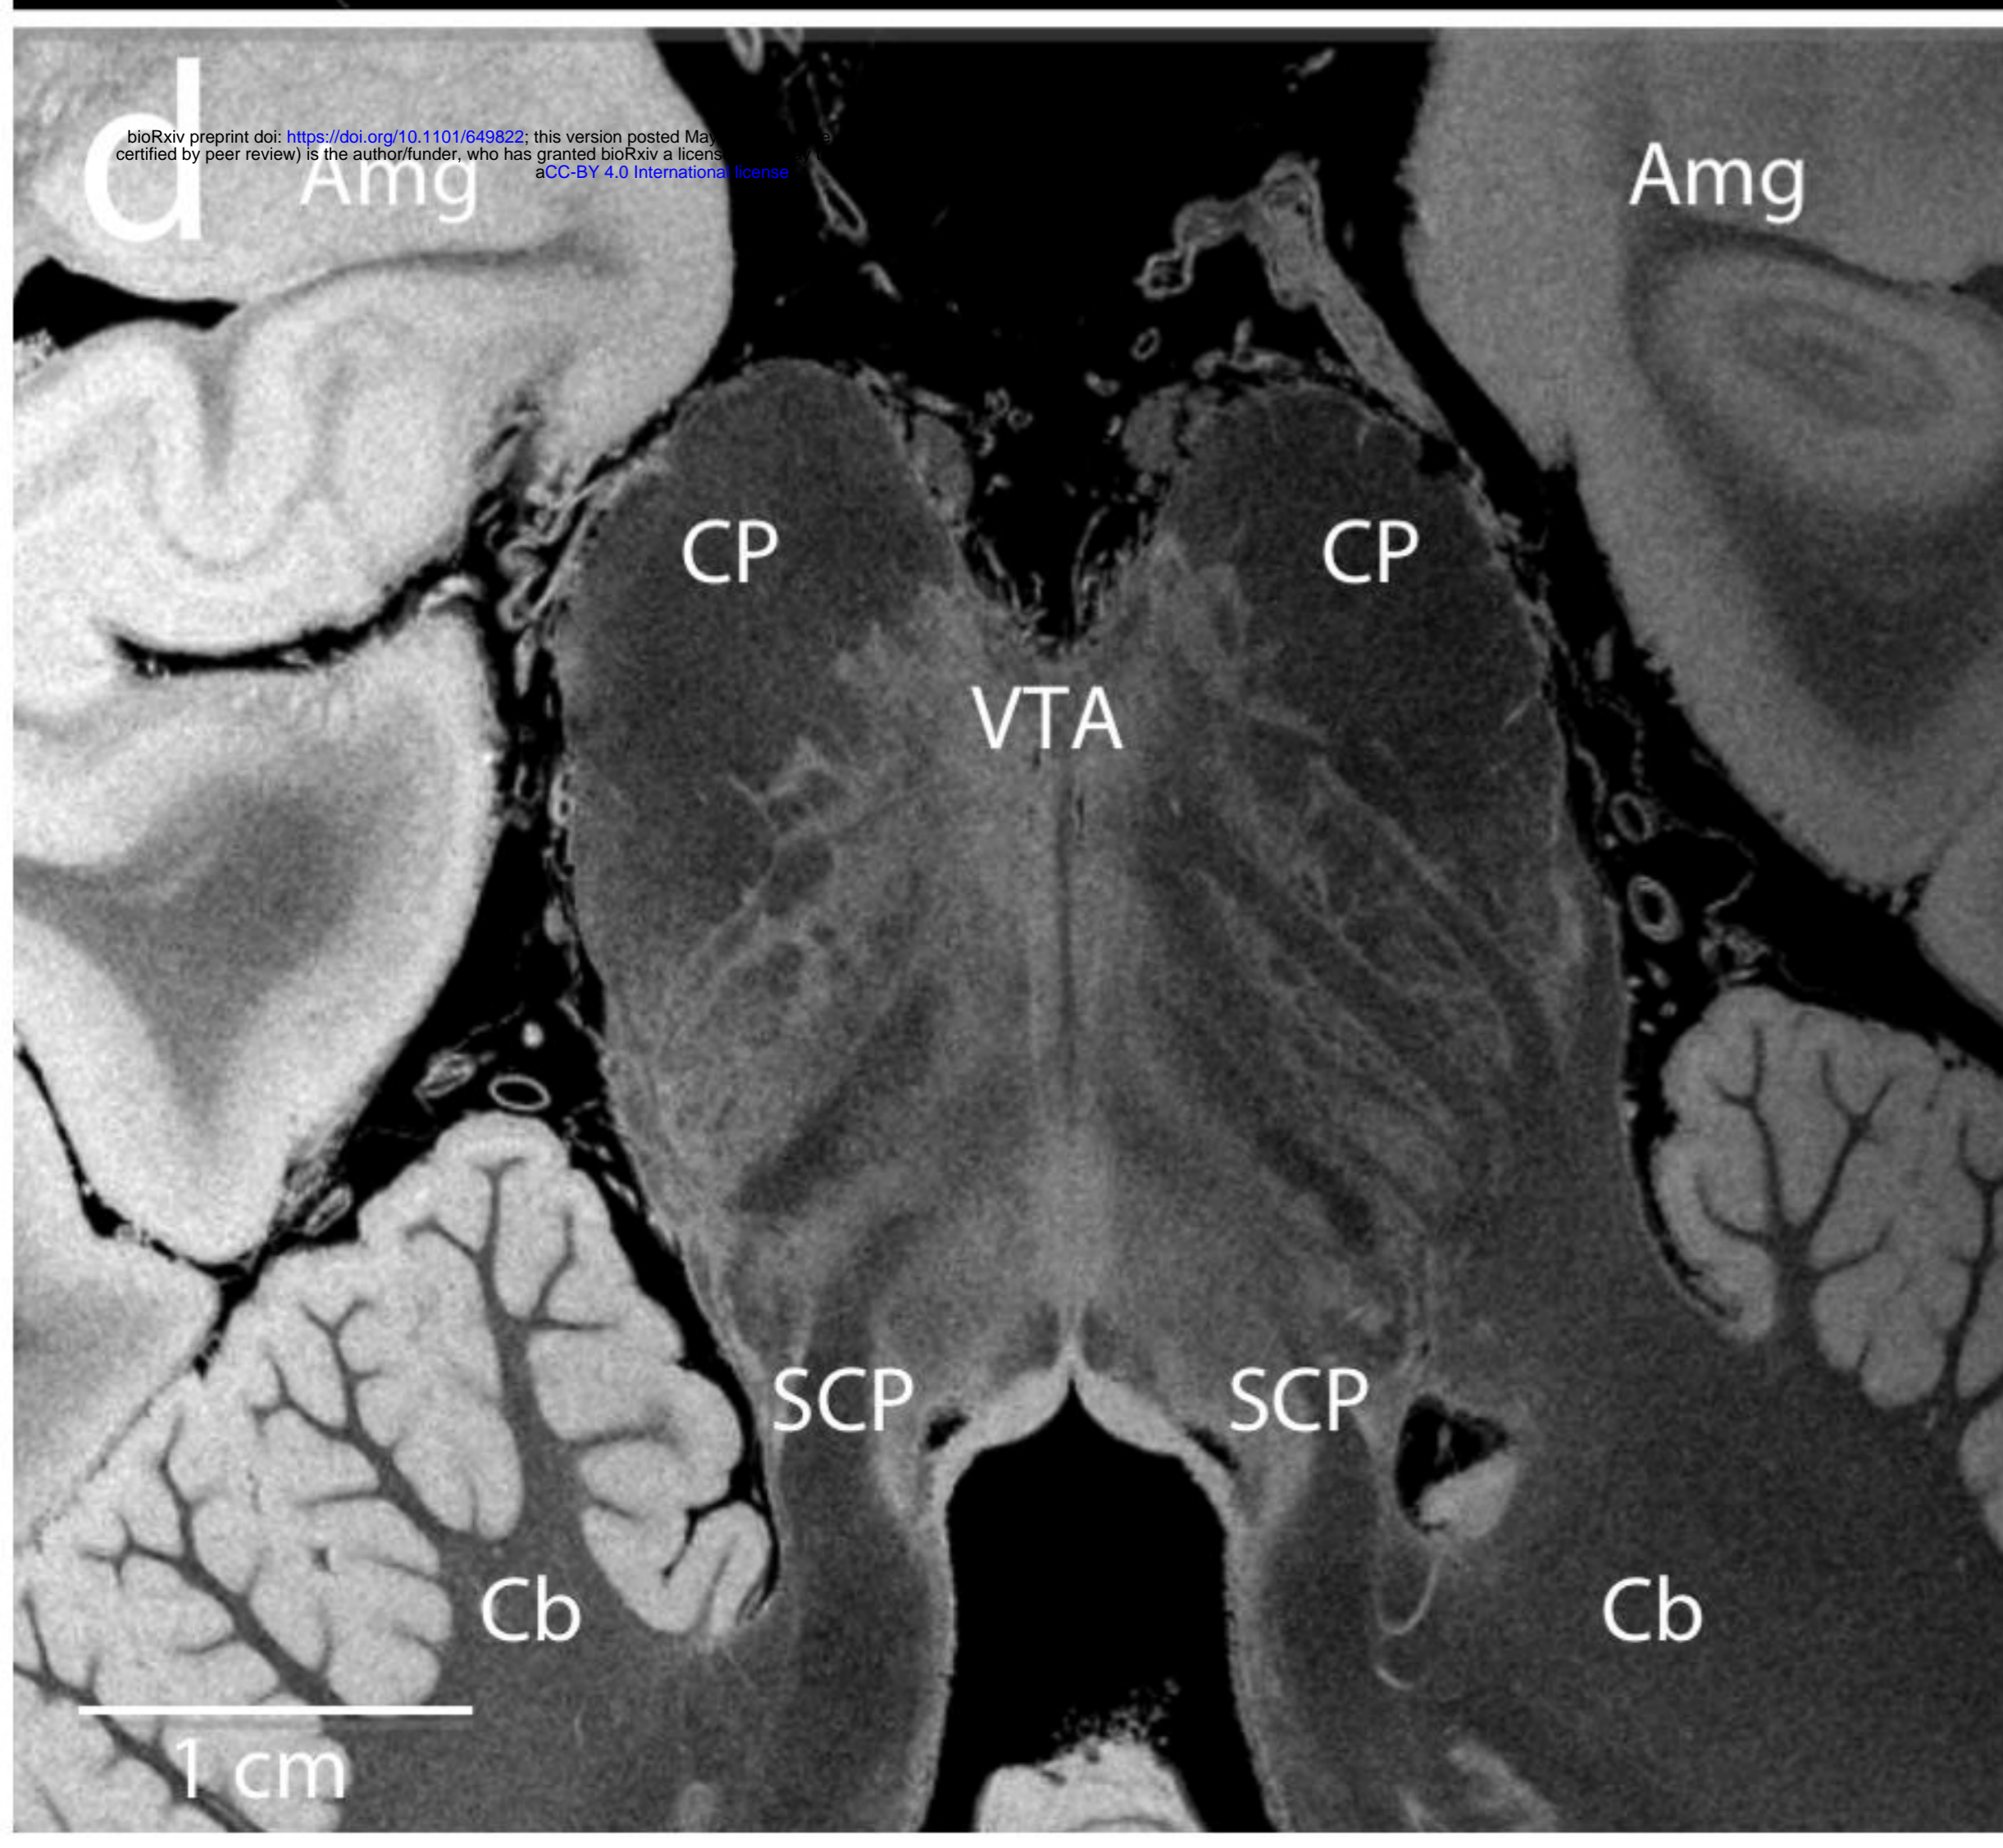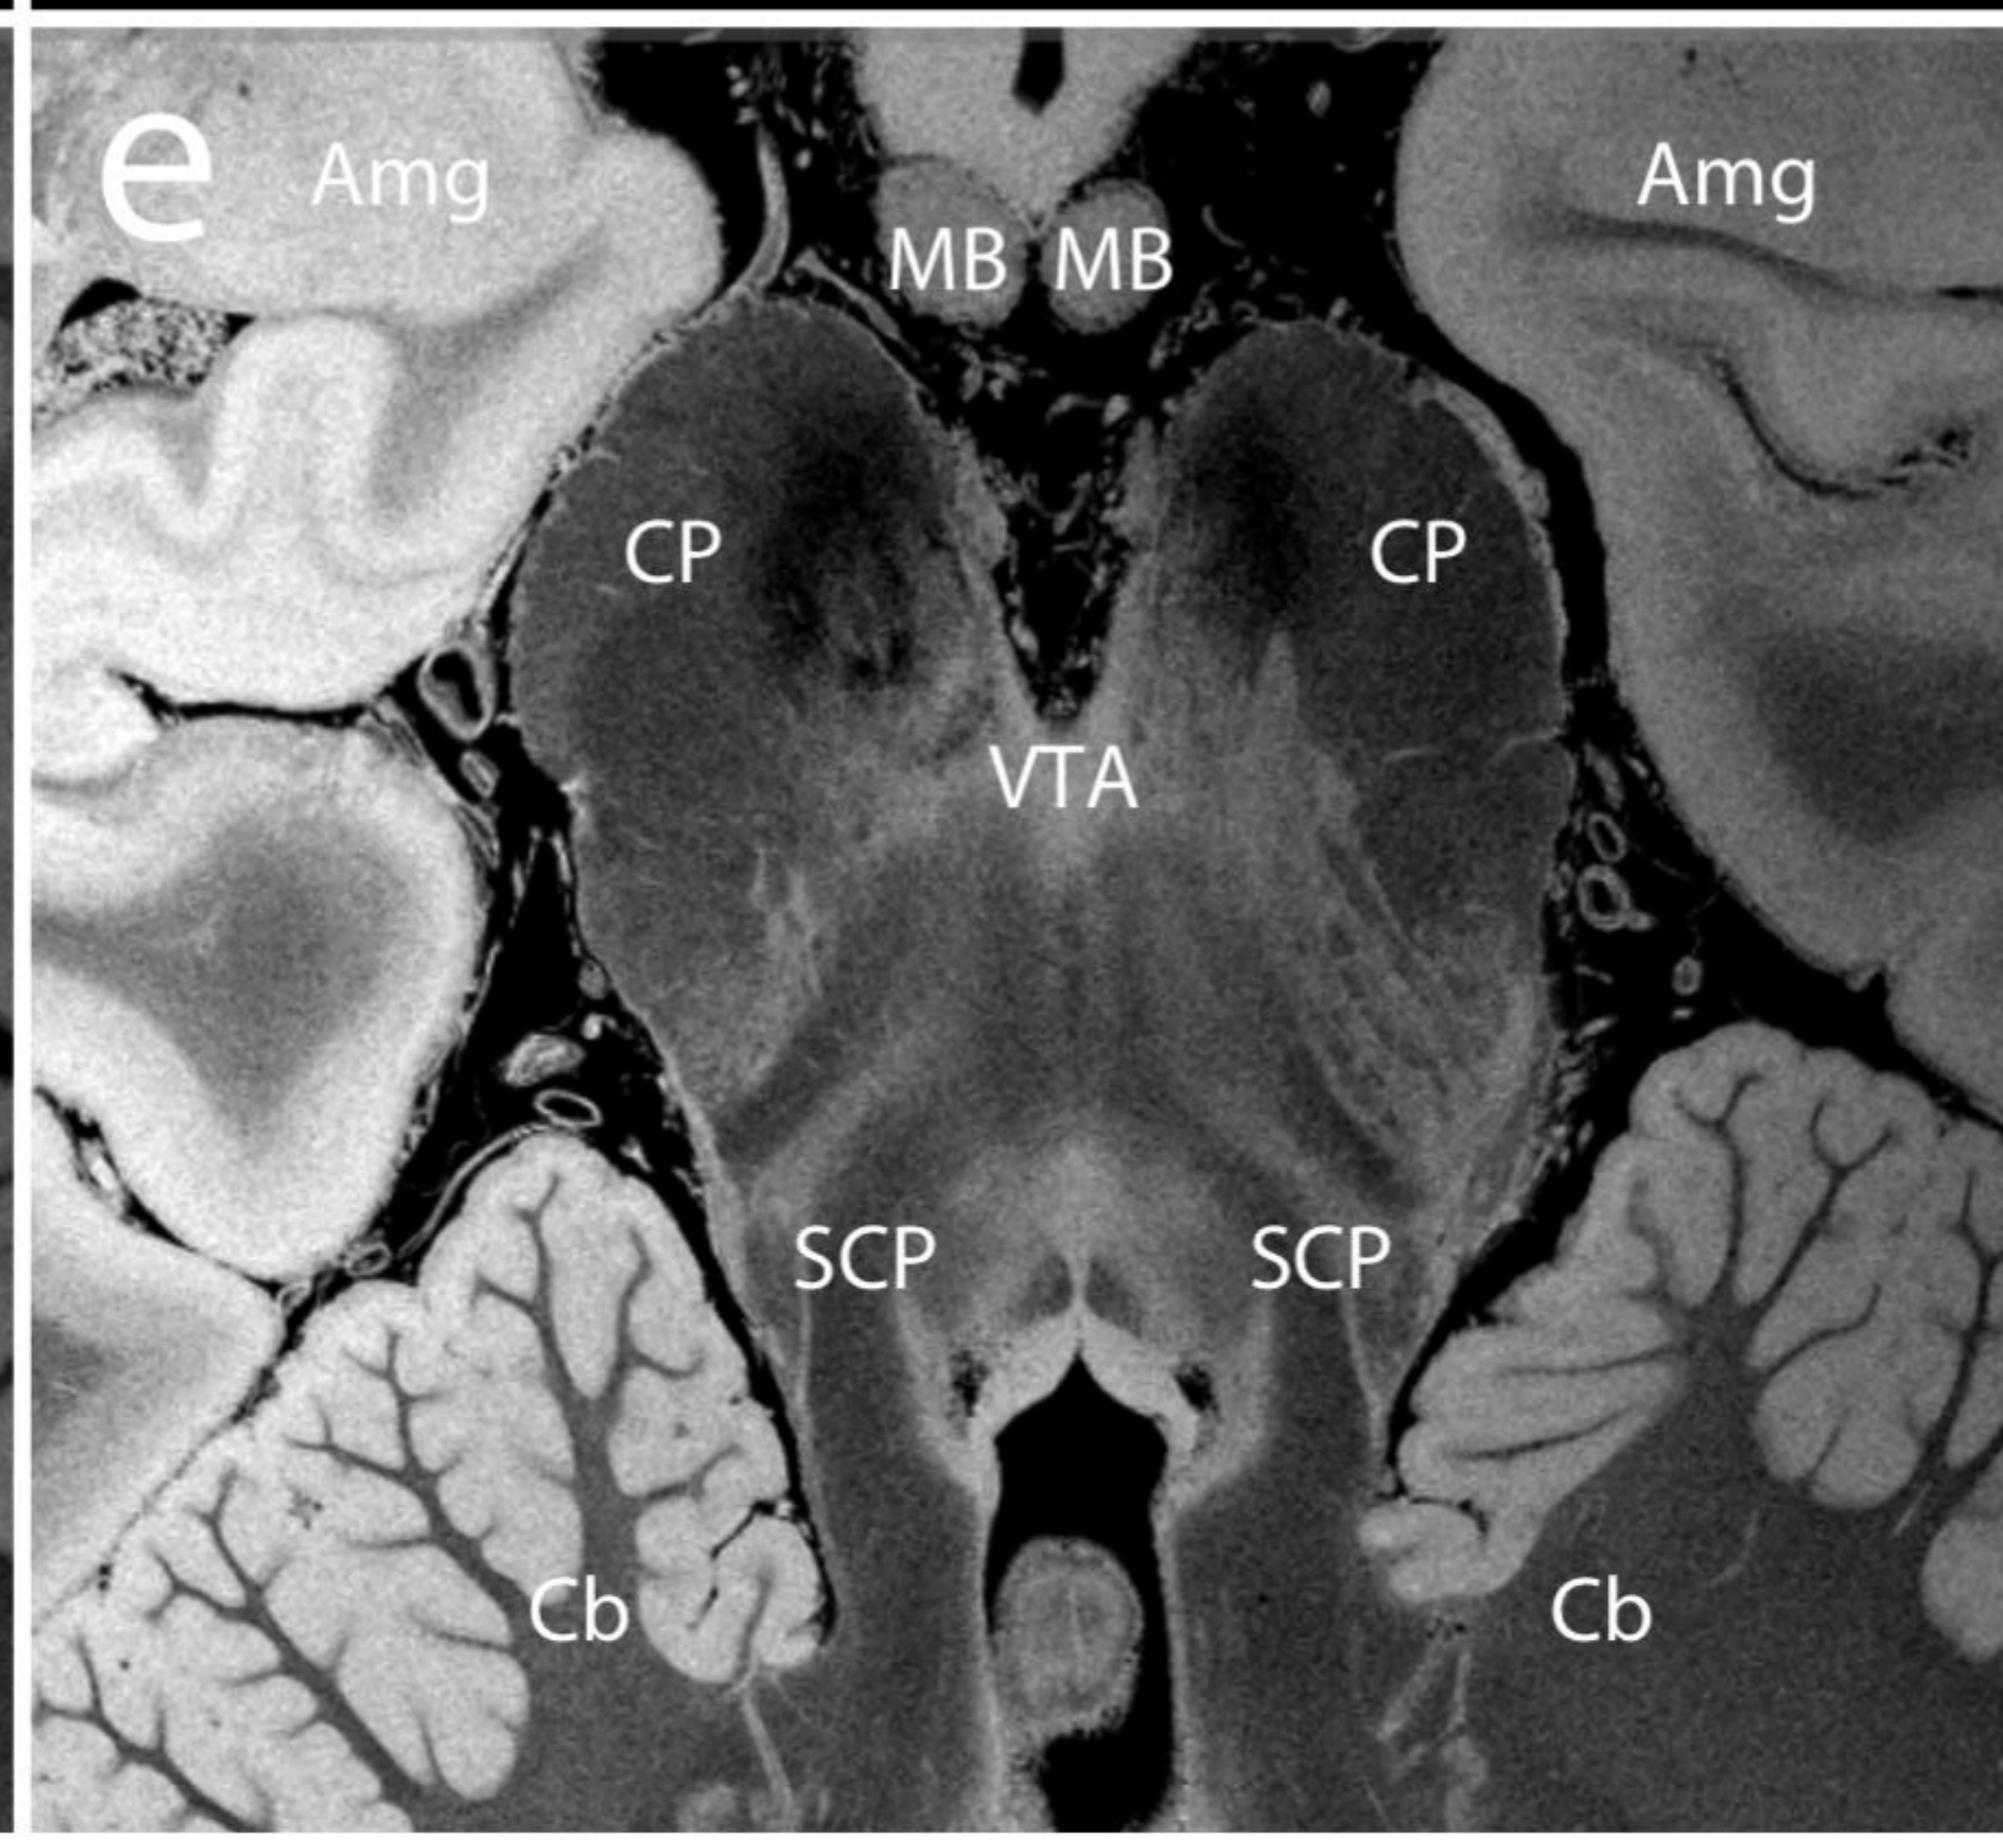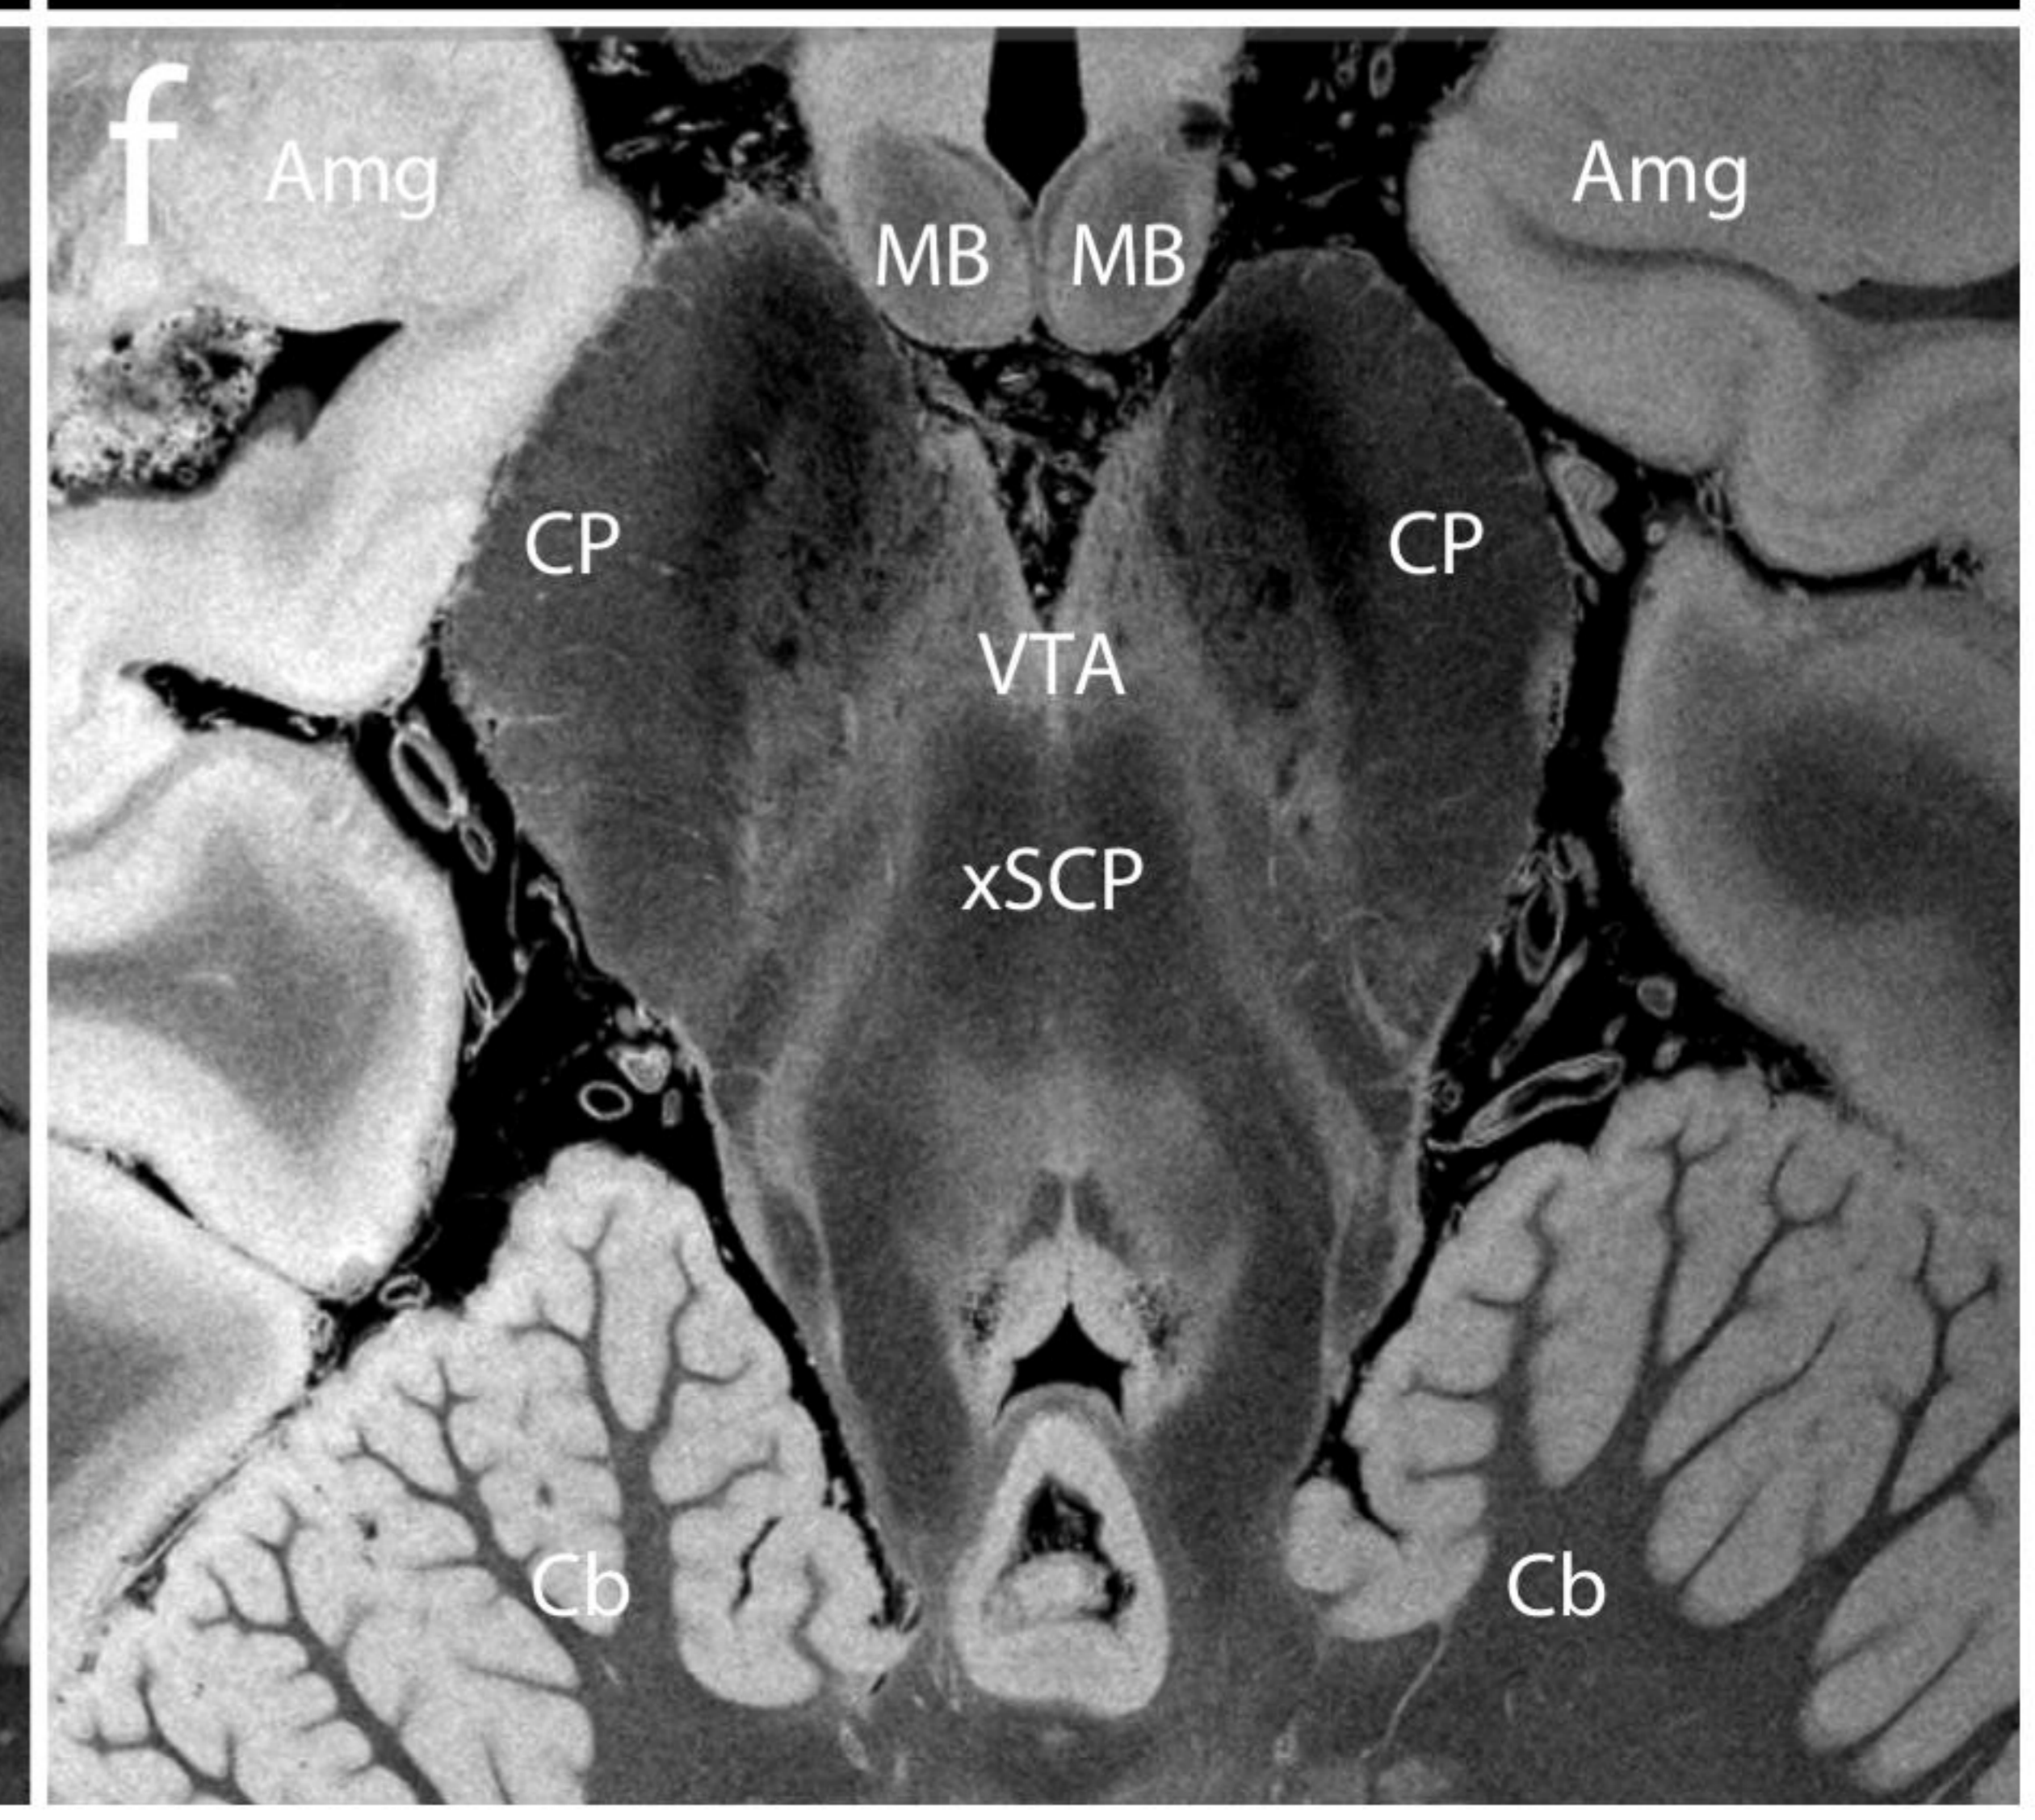



7T 31Ch  
*ex vivo* coil

7T 31Ch  
standard coil

3T 64Ch  
head coil

Sagittal

Coronal

Axial

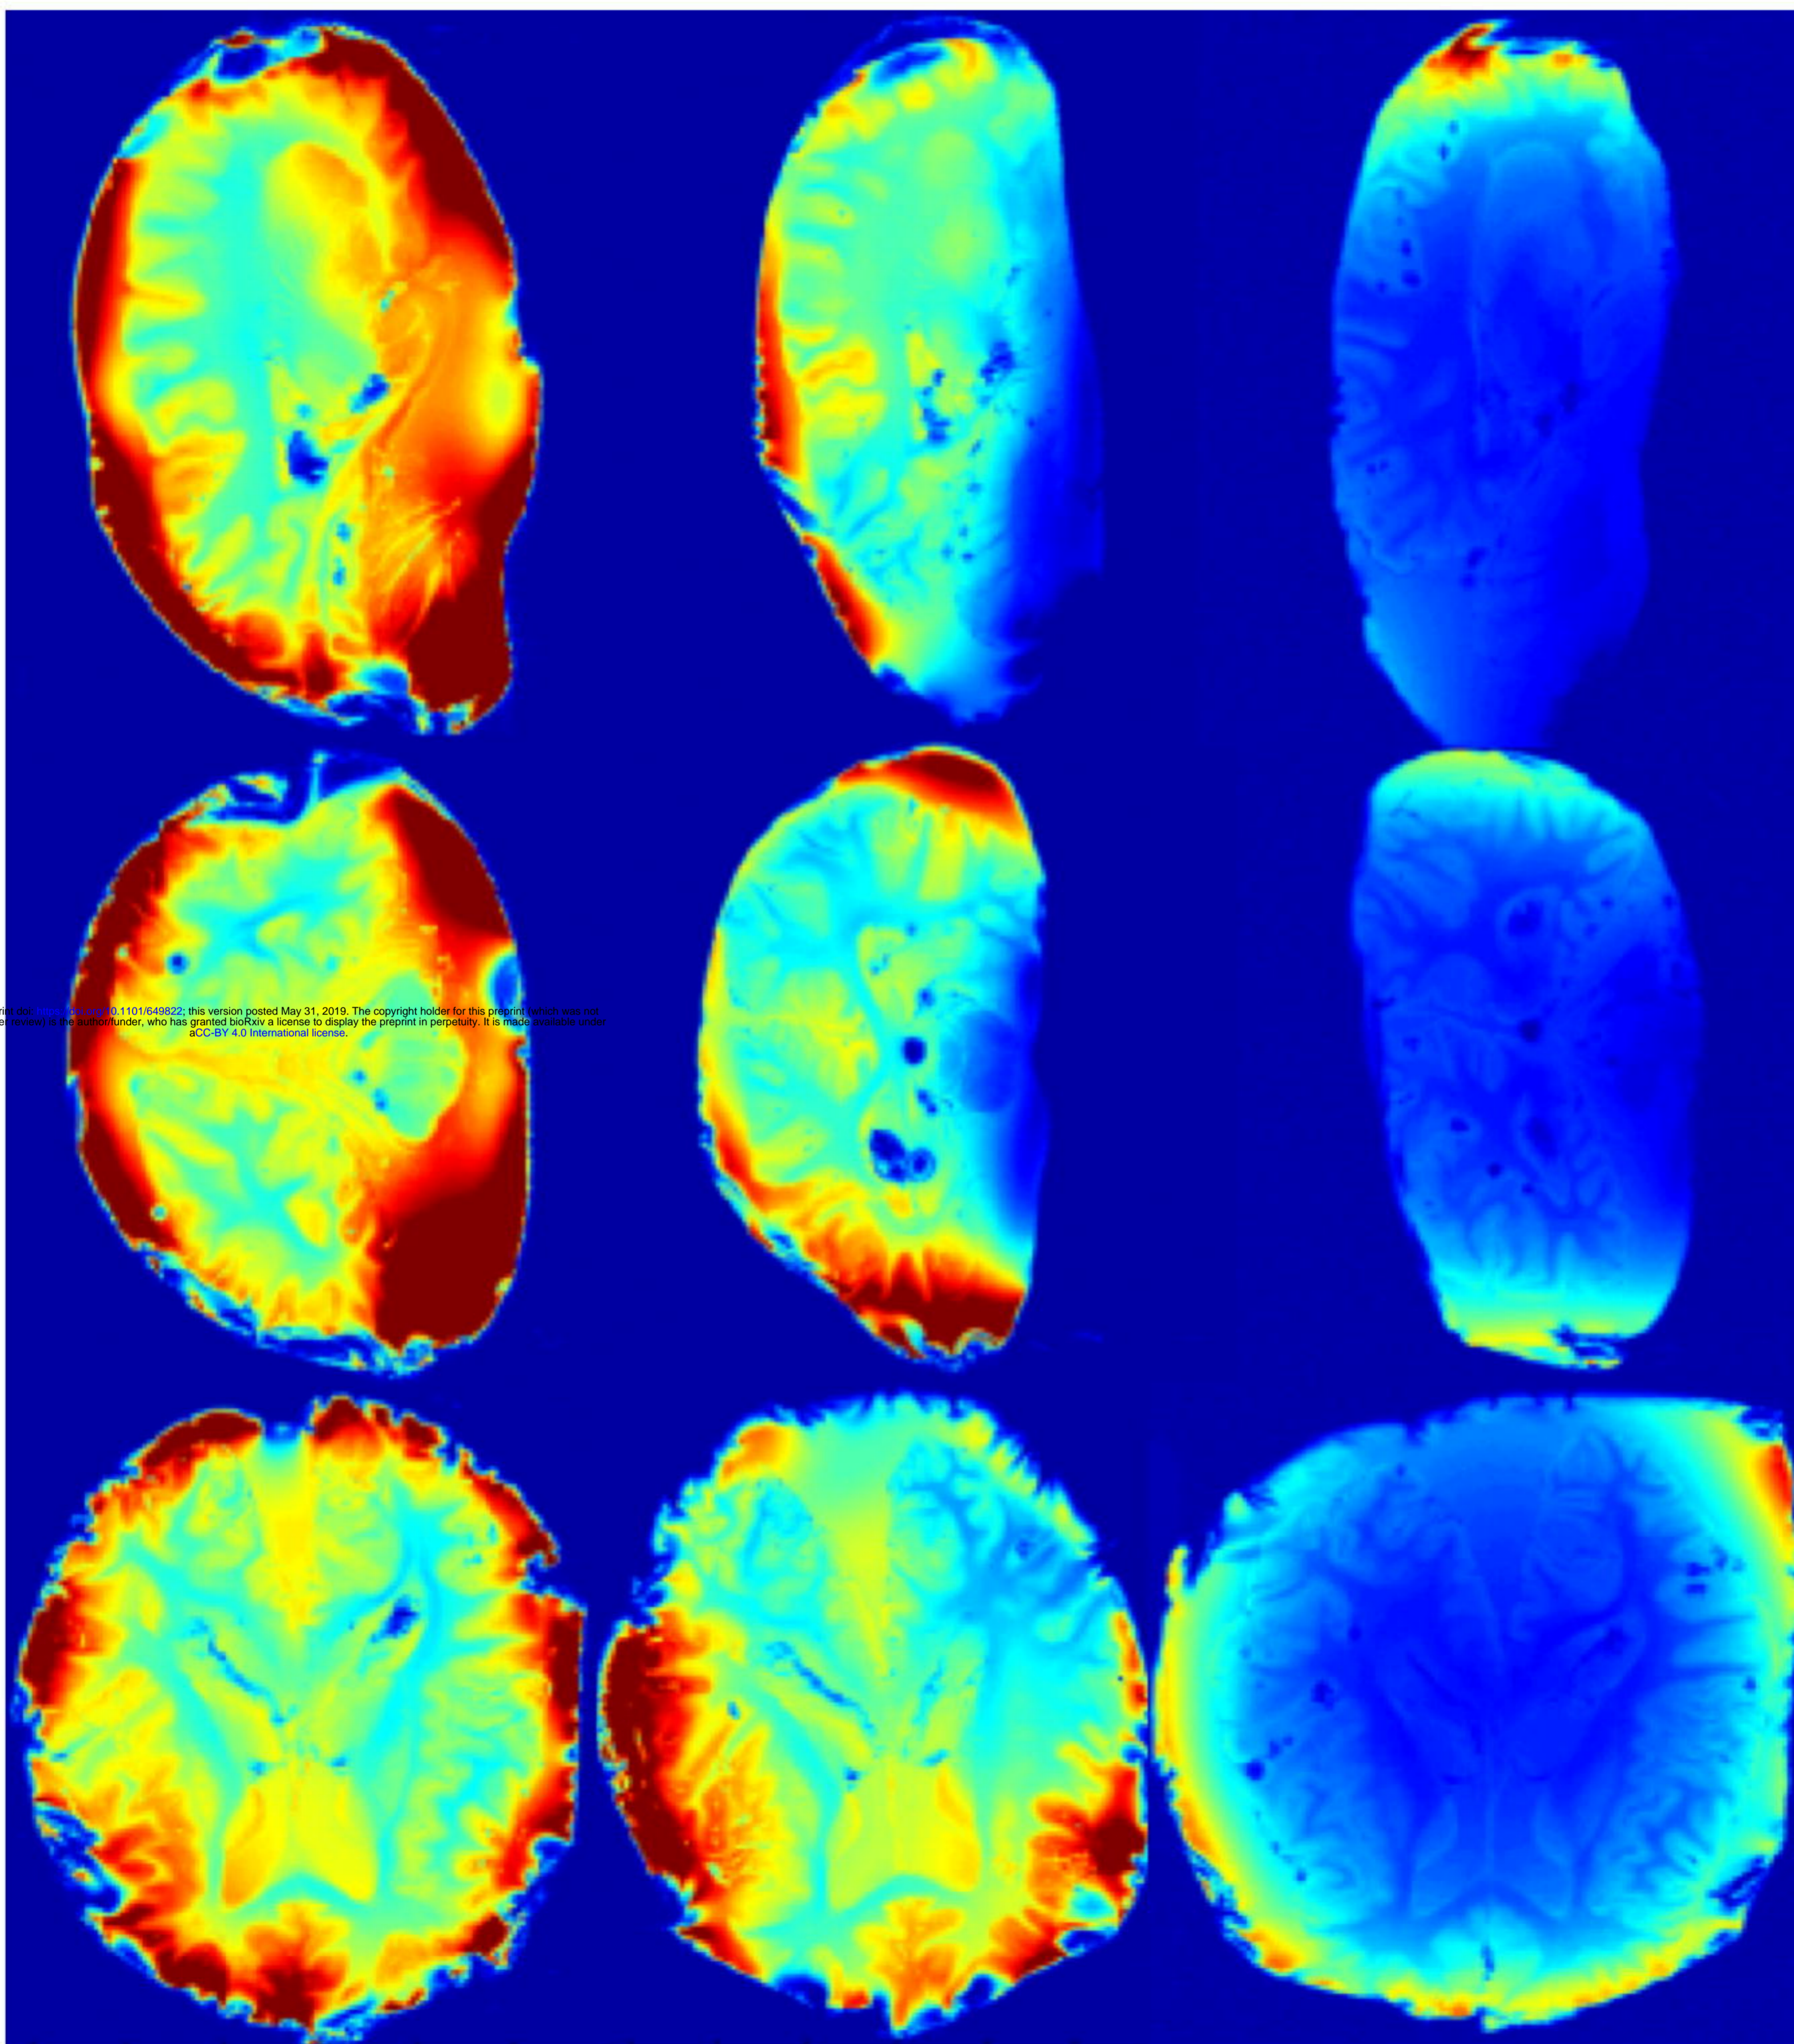

120

100

80

SNR  
Units

60

40

20

0

bioRxiv preprint doi: <https://doi.org/10.1101/649822>; this version posted May 31, 2019. The copyright holder for this preprint (which was not certified by peer review) is the author/funder, who has granted bioRxiv a license to display the preprint in perpetuity. It is made available under aCC-BY 4.0 International license.



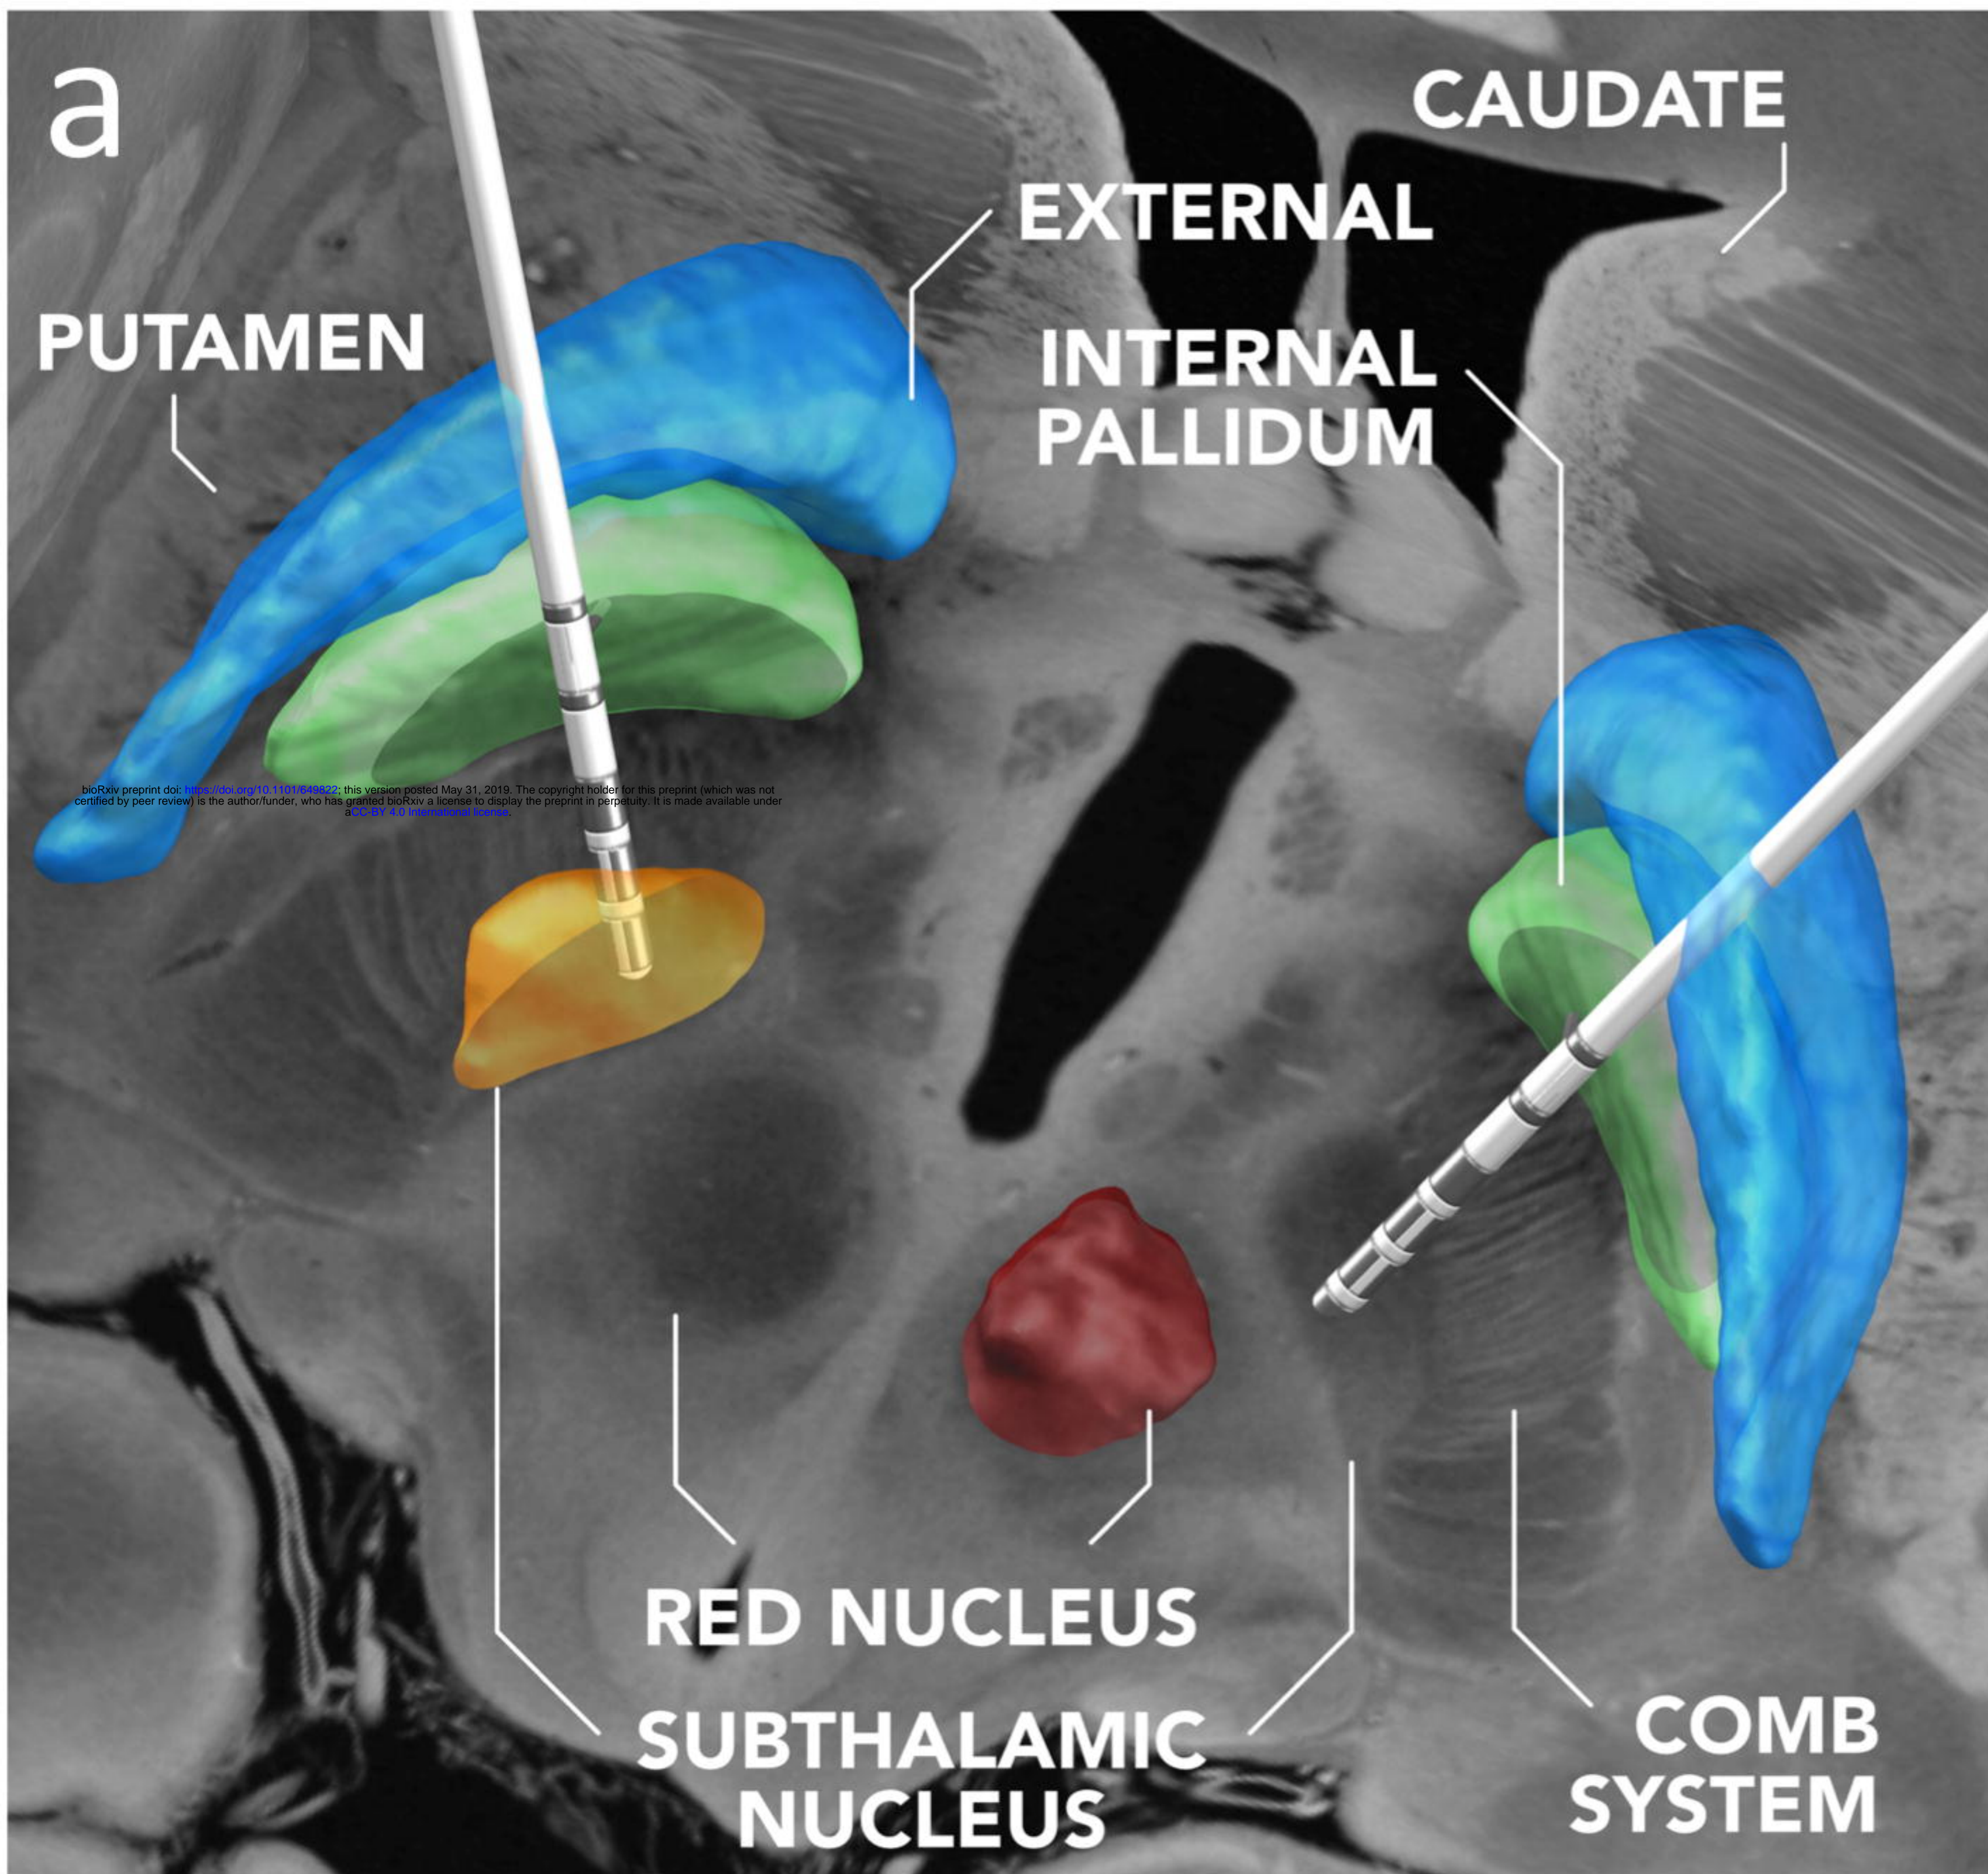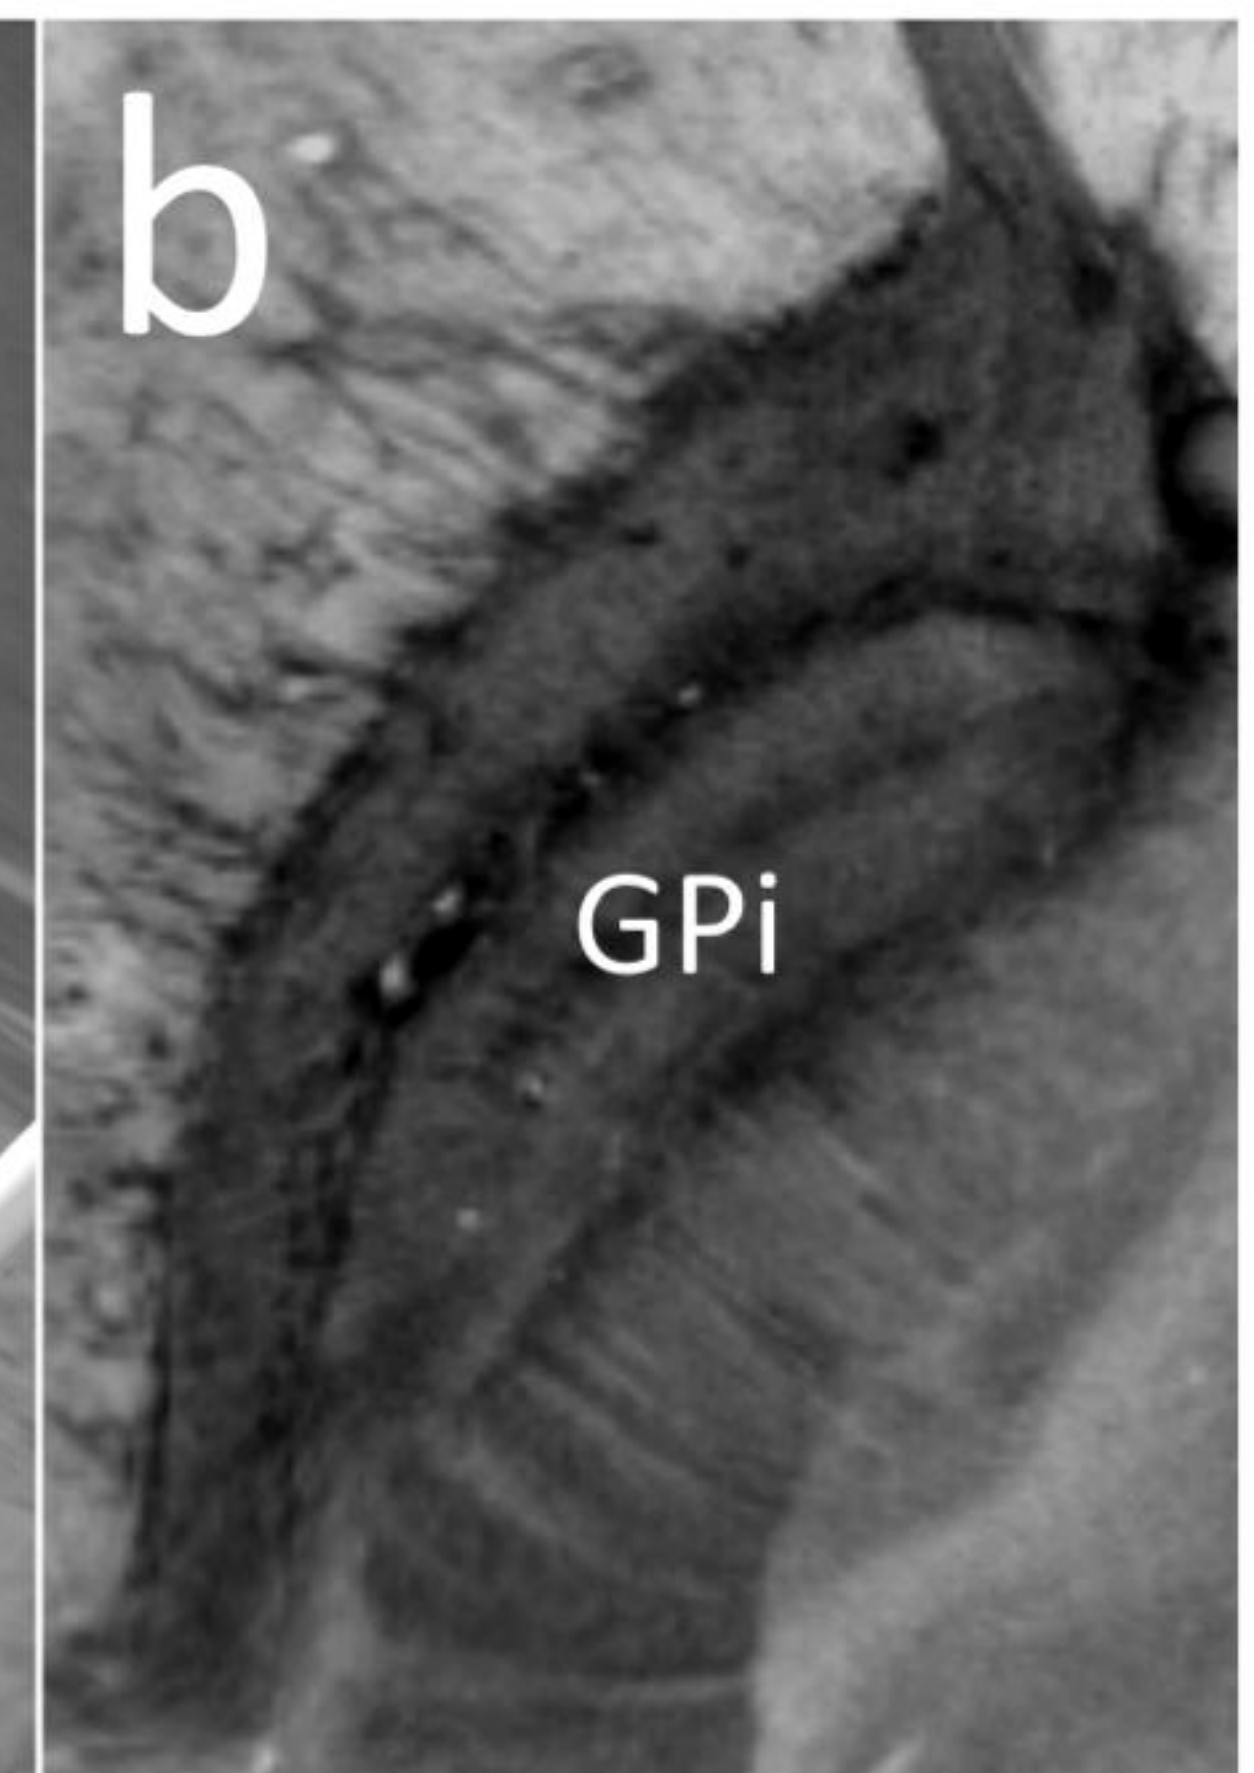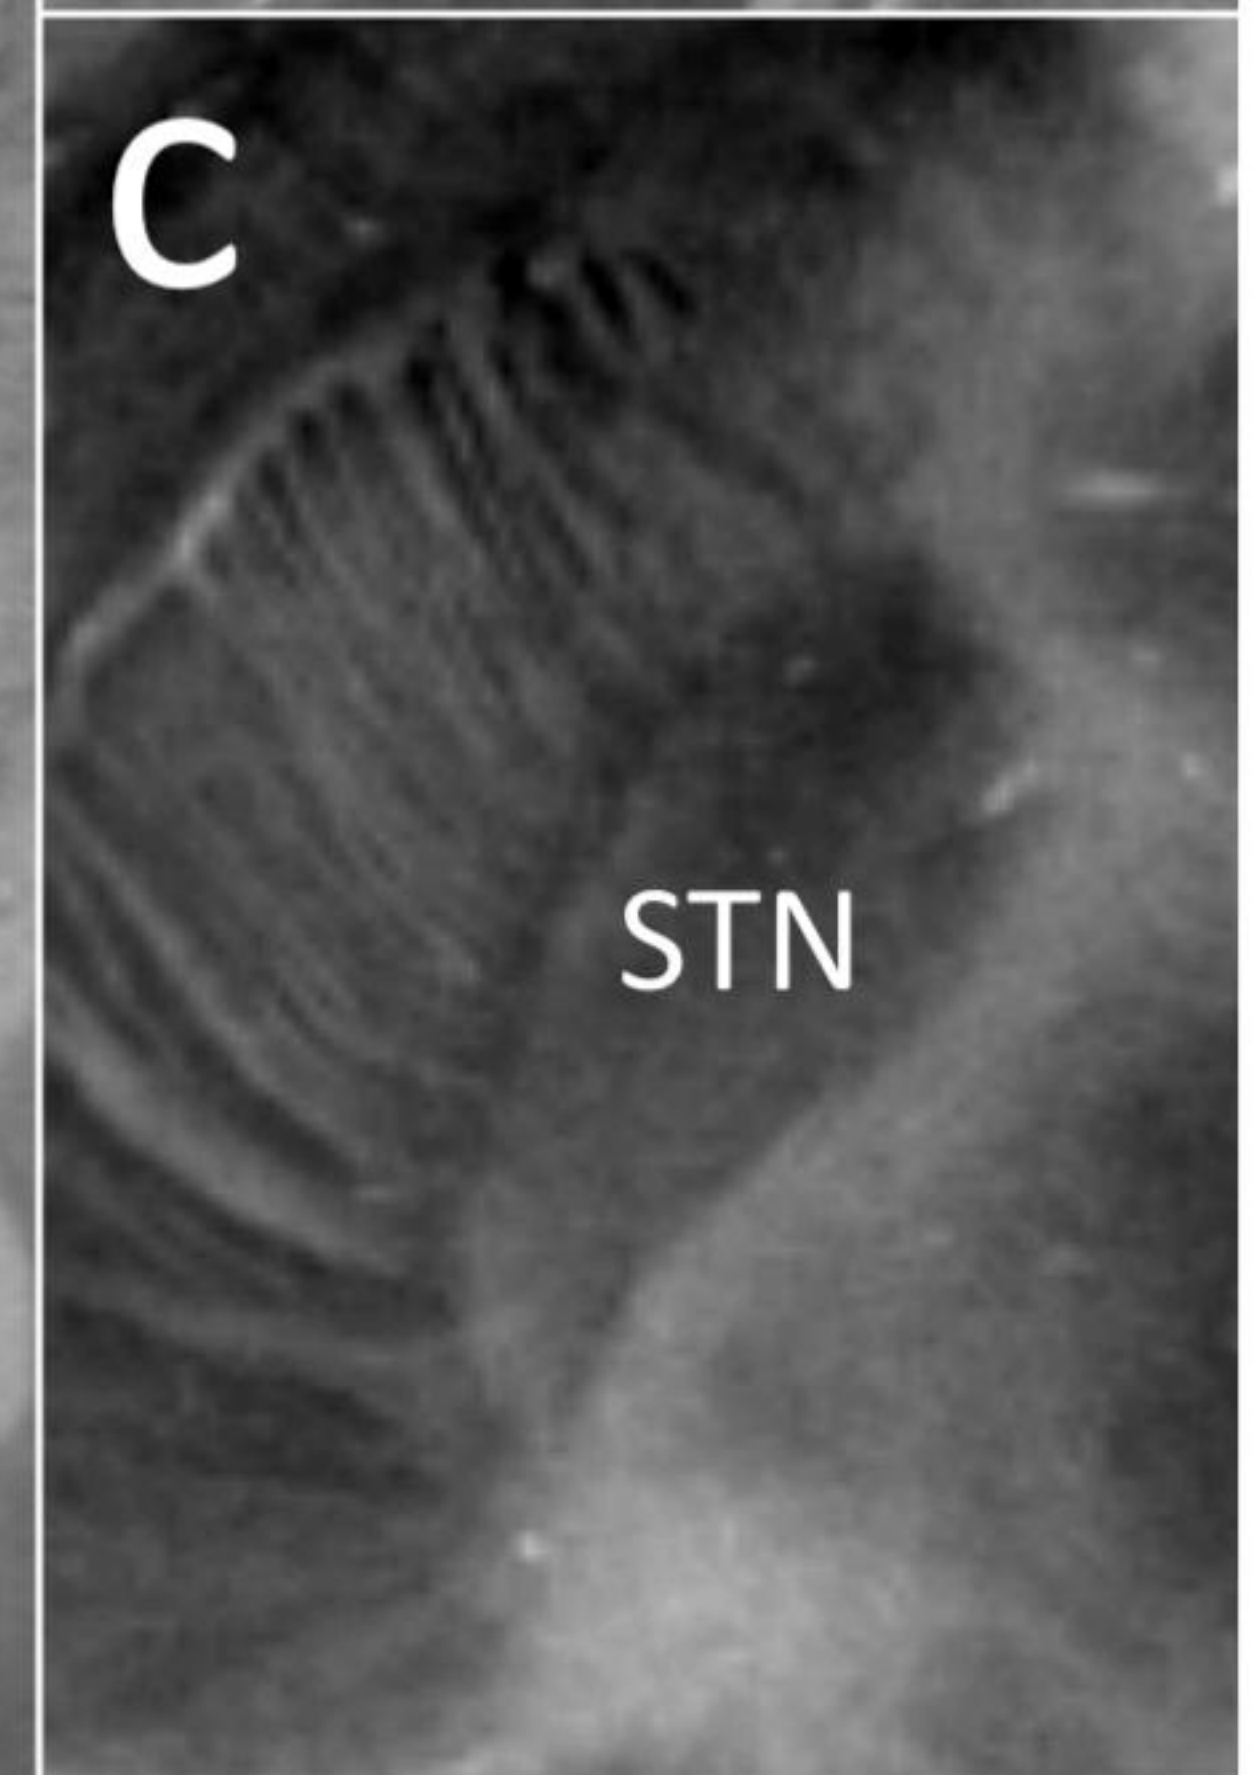

Source: http://biorxiv.org/content/10.1101/649822v1.full.pdf
